# Supplementary material for: Quantitative analysis of actors' mention in press coverage of a seismo-volcanic activity in the French overseas
Source: Copernicus journal article supplement (doi:10.5194/egusphere-2024-1358), 2024-06-14
Supplement: Supplementary file 1 [file egusphere-2024-1358-supplement.zip]

Archive with 3 entries (3 files):
- Supplementary Information/SI_co-citations.pdf
- Supplementary Information/TABLE_SA_NamedEntitiesToGeneralNames_Final.csv
- Supplementary Information/TABLE_SB_GeneralNamesToCategories_Final.csv
