# Supplementary material for: Quantitative analysis of actors' mention in press coverage of a seismo-volcanic activity in the French overseas
Source: Copernicus journal article supplement (doi:10.5194/egusphere-2024-1358), 2024-06-14
Supplement: Supplementary file 1 [file egusphere-2024-1358-supplement.zip › Supplementary Information/TABLE_SA_NamedEntitiesToGeneralNames_Final.csv]

Identifiant	Named_entities	General_name
20180516_la1ère_001	mahorais	Population
20180516_la1ère_001	BRGM (Bureau des Recherches Géologiques et Minières)	BRGM
20180516_la1ère_001	préfecture	Préfecture of Mayotte
20180516_la1ère_001	trois personnes blessées	3 injured people
20180516_la1ère_001	urgences	Emergency services
20180516_la1ère_001	la personne qui a diffusé les informations *fausses*	Rumor spreader
20180516_la1ère_001	scientifiques*non défini*	Scientists_undefined
20180516_la1ère_001	enfants	Children
20180516_la1ère_001	équipes pédagogiques	Teaching staff in Mayotte
20180516_la1ère_001	secours	Rescue services
20180516_la1ère_001	radio	Radio
20180516_la1ère_001	autorités	Authorities
20180516_la1ère_001	télévision	TV
20180516_la1ère_001	site internet du ministère de l’intérieur	Website of Ministry of the Interior
20180516_la1ère_001	site internet du Gouvernement	Website of the Government
20180516_la1ère_001	réseaux sociaux	Social medias
20180516_la1ère_001	ministère de l'intérieur	Ministry of Interior
20180516_la1ère_001	Gouvernement	French State
20180516_la1ère_001	*Préfecture de Mayotte*	Préfecture of Mayotte
20180516_la1ère_001	population	Population
20180521_la1ère_001	la presse mauricienne	Press in Maurice
20180521_la1ère_001	Le journal mauricien « l’Express »	The Express newspaper in Maurice
20180521_la1ère_001	Le géologue mauricien Prem Saddul	Prem Saddul
20180521_la1ère_001	autres géologues	Geologists_undefined
20180521_la1ère_001	le mahorais Said Hachim	Saïd Hachim
20180522_la1ère_001	les familles	Population
20180522_la1ère_001	les familles mahoraises	Population
20180522_la1ère_001	personnes âgées	Older people in Mayotte
20180522_la1ère_001	celles avec une santé fragile	People in poor health in Mayotte
20180524_la1ère_001	population	Population
20180524_la1ère_001	population	Population
20180528_la1ère_001	la famille	Evacuated family
20180528_la1ère_001	mairie *de Sada*	Municipality of Sada
20180529_la1ère_001	CPME (Confédération des Petites et Moyennes Entreprises)	Confederation of Small and Medium-sized Enterprises
20180529_la1ère_002	les administrations	Administrations in Mayotte
20180529_la1ère_002	établissements scolaires	Schools
20180529_la1ère_003	BRGM Le Bureau de Recherches Géologiques et Minières	BRGM
20180529_la1ère_003	BRGM	BRGM
20180529_la1ère_003	*BRGM*	BRGM
20180530_la1ère_001	la population de Mayotte	Population
20180530_la1ère_001	Une cellule d'aide psychologique	Psychological support cell
20180530_la1ère_001	les personnes	Population
20180530_la1ère_001	enfants	Children
20180530_la1ère_001	autorités	Authorities
20180530_la1ère_001	population	Population
20180531_la1ère_001	La mission gouvernementale sur les séismes	Interdepartmental expertise mission in June 2018
20180531_la1ère_001	la population	Population
20180531_la1ère_001	Trois missionnaires dépêchés par le gouvernement	3 interdepartmental experts sent in June 2018
20180531_la1ère_001	Mme Mendy Bendougou de la Direction de la Prévention des Risques du Ministère de l’Ecologie	Mendy Bengoubou
20180531_la1ère_001	le Lieutenant-Colonel Olivier Galichet de la Direction de la Sécurité Civile du Ministère de l’Intérieur	Lt-colonel Galichet
20180531_la1ère_001	M. Bastien Colas ingénieur sismologue envoyé par le Bureau de Recherche Géologique et Minière	Bastien Colas
20180531_la1ère_001	les deux premiers	Mendy Bengoubou
20180531_la1ère_001	Le sismologue	Bastien Colas
20180531_la1ère_001	habitants	Population
20180531_la1ère_001	« Marion Dufresne »	Marion Dufresne
20180531_la1ère_001	tous ceux qui voudraient savoir ce qui se passe dans cette plaine abyssale	Anyone who wants to know about what happens offshore
20180531_la1ère_002	Le président du conseil départemental	President of the departmental council
20180531_la1ère_002	Premier Ministre Edouard Philippe	Prime Minister
20180531_la1ère_002	population	Population
20180531_la1ère_002	Issa Abdou 4ème vice-président du Conseil Départemental	Vice-President of the departmental council
20180601_la1ère_001	Les mairies	Municipalities
20180601_la1ère_001	Les habitants	Population
20180601_la1ère_001	Les mairies de Mayotte	Municipalities
20180601_la1ère_001	*mairie* de Bandraboua	Municipality of Bandraboua
20180602_la1ère_001	La mission d’expertise	Interdepartmental expertise mission in June 2018
20180602_la1ère_001	Les trois experts dépêchés par le gouvernement à Mayotte	3 interdepartmental experts sent in June 2018
20180602_la1ère_001	préfet Dominique Sorain	Préfet of Mayotte
20180602_la1ère_001	Mendy Bendougou de la Direction de la Prévention des Risques du Ministère de l’Ecologie	Mendy Bengoubou
20180602_la1ère_001	le Lieutenant-Colonel Olivier Galichet de la Direction de la Sécurité Civile du Ministère de l’Intérieur	Lt-colonel Galichet
20180602_la1ère_001	M. Bastien Colas ingénieur sismologue envoyé par le Bureau de Recherche Géologique et Minière	Bastien Colas
20180602_la1ère_001	journalistes locaux	Local journalists
20180602_la1ère_002	les familles	Population
20180602_la1ère_002	la population	Population
20180602_la1ère_002	le Préfet Dominique Sorain	Préfet of Mayotte
20180602_la1ère_002	une vingtaine de patients	About 20 injured people in Mayotte
20180602_la1ère_002	les services d’urgence	Emergency services
20180602_la1ère_002	les habitants	Population
20180602_la1ère_002	autorités	Authorities
20180602_la1ère_002	Certains *mahorais*	Witnesses in Mayotte
20180602_la1ère_002	Une pharmacienne de Mamoudzou	Witnesses in Mayotte
20180602_la1ère_002	certains *mahorais*	Witnesses in Mayotte
20180602_la1ère_002	le réseau social Facebook	Facebook
20180602_la1ère_002	un groupe intitulé « Signalement Tremblement de Terre Mayotte »	STTM
20180602_la1ère_002	10 000 internautes	STTM members
20180602_la1ère_002	*10 000 internautes*	STTM members
20180602_la1ère_002	une participante	STTM members
20180602_la1ère_002	Des parents	Parents in Mayotte
20180602_la1ère_002	les enfants	Children
20180602_la1ère_002	ces parents	Parents in Mayotte
20180602_la1ère_002	préfecture	Préfecture of Mayotte
20180602_la1ère_002	population	Population
20180602_la1ère_002	la mission promise par le gouvernement	Interdepartmental expertise mission in June 2018
20180602_la1ère_002	Ces spécialistes	Interdepartmental expertise mission in June 2018
20180602_la1ère_002	les plus anxieux	Anxious people in Mayotte
20180605_la1ère_001	La mission d'expertise	Interdepartmental expertise mission in June 2018
20180605_la1ère_001	Zakwéli	Zakweli
20180605_la1ère_001	Le Lieutenant-Colonel Olivier Galichet de la Direction de la Sécurité Civile du Ministère de l’Intérieur	Lt-colonel Galichet
20180605_la1ère_001	Bastien Colas ingénieur sismologue envoyé par le BRGM	Bastien Colas
20180605_la1ère_002	les experts	Interdepartmental expertise mission in June 2018
20180605_la1ère_002	Les experts arrivés à Mayotte	Interdepartmental expertise mission in June 2018
20180605_la1ère_002	certains habitants	Population
20180605_la1ère_002	conseil départemental	Departmental council
20180605_la1ère_003	experts	Interdepartmental expertise mission in June 2018
20180605_la1ère_003	la population	Population
20180606_la1ère_001	Les mahorais de la Réunion	Mahorese in La Reunion
20180606_la1ère_001	leurs familles restées au pays	Population
20180606_la1ère_001	De nombreuses familles mahoraises	Mahorese in La Reunion
20180606_la1ère_001	*Les mahorais de la Réunion*	Mahorese in La Reunion
20180606_la1ère_001	Certaines *familles de mahorais de la Réunion*	Mahorese in La Reunion
20180608_la1ère_001	Des enseignants	Teachers in Mayotte
20180608_la1ère_001	Le service départemental du renseignement territorial SDRT	The departmental service of territorial intelligence
20180608_la1ère_001	professeurs	Teachers in Mayotte
20180608_la1ère_001	proviseur du collège de Pamandzi	Headmaster of junior high school in Pamandzi
20180608_la1ère_001	proviseur du lycée polyvalent de Petite-Terre	Headmaster of a high school in Petite Terre
20180608_la1ère_001	M. Durand le proviseur du collège de Pamandzi	Headmaster of junior high school in Pamandzi
20180608_la1ère_001	Certains professeurs	Some teachers in Mayotte
20180608_la1ère_001	D'autres professeurs	Other teachers in Mayotte
20180608_la1ère_001	le SDRT	The departmental service of territorial intelligence
20180608_la1ère_001	les élèves	Schoolers in Mayotte
20180608_la1ère_001	*La Croix*	La Croix
20180608_la1ère_001	*Wikipédia*	Wikipedia
20180608_la1ère_001	*Services départementaux du renseignement territorial *	The departmental service of territorial intelligence
20180611_la1ère_001	Jean-Michel Blanquer	Minister of National Education
20180611_la1ère_001	personnels de l'Education nationale à Mayotte	National Education staff in Mayotte
20180611_la1ère_001	Jean-Michel Blanquer le ministre de l'Education	Minister of National Education
20180611_la1ère_001	*Ministre de l'Education Nationale*	Minister of National Education
20180615_la1ère_001	des experts*de terrain*	Scientists_undefined
20180615_la1ère_001	Des experts scientifiques	Scientists_undefined
20180619_la1ère_001	la cellule psychologique au CHM	Psychological support cell
20180619_la1ère_001	un dispositif *cellule psychologique au CHM*	Psychological support cell
20180619_la1ère_001	la population	Population
20180622_la1ère_001	Les pompiers	Firemen
20180622_la1ère_001	Une quinzaine de personnes	Evacuated people in Mayotte
20180628_la1ère_001	un élu	Elected official
20180628_la1ère_001	Un observatoire sismique	A hypothetical observatory in Mayotte
20180628_la1ère_001	Chihaboudine Ben Youssouf conseiller départemental Mamoudzou	Departmental advisor Chihaboudine Ben Youssouf
20180628_la1ère_001	Chihaboudine Ben Youssouf le conseiller départemental de Mamoudzou 2	Departmental advisor Chihaboudine Ben Youssouf
20180628_la1ère_001	observatoire sismique	A hypothetical observatory in Mayotte
20180628_la1ère_001	commission permanente	Permanent commission in the departmental council
20180628_la1ère_001	observatoire sismique à Mayotte	A hypothetical observatory in Mayotte
20180628_la1ère_001	Le Président de l’union pour le renouveau de Mayotte et conseiller départemental de Mamoudzou 2	Departmental advisor Chihaboudine Ben Youssouf
20180628_la1ère_001	population	Population
20180628_la1ère_001	*Le Président de l’union pour le renouveau de Mayotte*	Departmental advisor Chihaboudine Ben Youssouf
20180628_la1ère_001	les habitants	Population
20180628_la1ère_001	les investisseurs	Investisors in Mayotte
20180628_la1ère_001	l’institut physique du globe de Paris	IPGP
20180628_la1ère_001	Chiaboudine Ben Youssouf Conseiller départemental de Mamoudzou 2	Departmental advisor Chihaboudine Ben Youssouf
20180628_la1ère_001	tous les conseillers départementaux	Departmental advisors
20180628_la1ère_001	un vice-président du CD	A vice-president of the departmental council
20180628_la1ère_001	l'Etat	French State
20180628_la1ère_001	Chihaboudine Ben Youssouf	Departmental advisor Chihaboudine Ben Youssouf
20180628_la1ère_001	l'ancien vice président du conseil général	Departmental advisor Chihaboudine Ben Youssouf
20180628_la1ère_001	Conseil Départemental	Departmental council
20180628_la1ère_001	certains conseillers	Departmental advisors
20180628_la1ère_001	Premier Ministre Edouard Philippe	Prime Minister
20180628_la1ère_001	Soibahadine Ibrahim Ramadani le président du Conseil Départemental	President of the departmental council
20180628_la1ère_001	mahorais	Population
20180628_la1ère_001	Conseil Départemental de Mayotte	Departmental council
20180628_la1ère_001	une mission scientifique	Scientific campaign
20180628_la1ère_001	cellules psychologiques	Psychological support cell
20180628_la1ère_001	population	Population
20180628_la1ère_001	lettre du président du Conseil Départemental	President of the departmental council
20180628_la1ère_001	premier ministre	Prime Minister
20180628_la1ère_001	*Le Président de l’union pour le renouveau de Mayotte*	Departmental advisor Chihaboudine Ben Youssouf
20180628_la1ère_001	l'ensemble des acteurs	All the actors
20180628_la1ère_001	la préfecture	Préfecture of Mayotte
20180628_la1ère_001	le Conseil Départemental	Departmental council
20180628_la1ère_001	les parlementaires	Members of Parliament
20180719_la1ère_001	le BRGM	BRGM
20180719_la1ère_001	aux scientifiques du BRGM	Scientists from BRGM
20180719_la1ère_001	le Bureau de recherches géologiques et minière (BRGM) de Mayotte	BRGM in Mayotte
20180719_la1ère_001	les services de l'Etat	State services
20180719_la1ère_001	*BRGM*	BRGM
20180719_la1ère_001	site internet *du BRGM*	Website of BRGM
20180719_la1ère_001	public	The public
20180719_la1ère_001	Frédéric Tronel directeur régional du BRGM Mayotte	Frédéric Tronel
20180719_la1ère_001	population	Population
20180719_la1ère_001	les scientifiques	Scientific community
20180719_la1ère_001	Frédéric Tronel	Frédéric Tronel
20180719_la1ère_001	l’ensemble de la communauté scientifique	Scientific community
20180719_la1ère_001	Le BRGM	BRGM
20180719_la1ère_001	Les élus de Mayotte	Local elected officials
20180719_la1ère_001	l'Etat	French State
20190114_la1ère_001	les pêcheurs	Fishermen of Mayotte
20190114_la1ère_001	Les services des affaires maritimes	Maritime affairs services
20190115_la1ère_001	consommateurs	Consumers in Mayotte
20190115_la1ère_001	les autorités	Authorities
20190115_la1ère_001	les professionnels *poissonniers*	Fishmongers of Mayotte
20190115_la1ère_001	L’IFREMER	IFREMER
20190117_la1ère_001	Said Hachim	Saïd Hachim
20190117_la1ère_001	des scientifiques*non défini*	Scientists_undefined
20190117_la1ère_001	ces scientifiques*non défini*	Scientists_undefined
20190117_la1ère_001	Franck Lavigne professeur des universités à Paris 1 directeur du Laboratoire Géographie Physique au CNRS	Franck Lavigne
20190117_la1ère_001	Frédéric Léone professeur des universités à Montpellier 3 spécialiste des risques naturels	Frédéric Leone
20190117_la1ère_001	D'autres *scientifiques*	Scientists_undefined
20190117_la1ère_001	Paul Allen	American billionaire Paul Allen
20190117_la1ère_001	milliardaire américain Paul Allen	American billionaire Paul Allen
20190117_la1ère_001	Ce passionné de volcanologie	American billionaire Paul Allen
20190117_la1ère_001	son Yacht « l’Octopus »	Octopus
20190117_la1ère_001	L'Octopus yacht du milliardaire Paul Allen	Octopus
20190117_la1ère_001	Mtsamboro	Commune of Mtsamboro
20190131_la1ère_001	commune de Mtzamboro	Commune of Mtsamboro
20190131_la1ère_001	l'Etat	French State
20190131_la1ère_001	personnes	Population
20190131_la1ère_001	*Unidentified*	Unidentified
20190131_la1ère_001	commune	Communes
20190226_la1ère_001	Les missions	Scientific campaigns
20190226_la1ère_001	Plusieurs missions à terre comme en mer	Scientific campaigns
20190226_la1ère_001	CNRS	CNRS
20190226_la1ère_001	BRGM	BRGM
20190226_la1ère_001	l’Institut de physique du globe de Paris	IPGP
20190226_la1ère_001	l’IGN	IGN
20190226_la1ère_001	l’Ifremer	IFREMER
20190226_la1ère_001	ministère de la Transition écologique et solidaire	Ministry of Ecological Transition and Solidarity
20190226_la1ère_001	Une équipe de l’Institut de physique du globe de Paris	Team from IPGP
20190226_la1ère_001	un bateau	A boat
20190226_la1ère_001	deux ingénieurs	Two ingeniors from IPGP
20190226_la1ère_001	un chercheur	Wayne Crawford
20190226_la1ère_001	Wayne Crawford scientifique à l’institut de physique du globe de Paris	Wayne Crawford
20190226_la1ère_001	le scientifique	Wayne Crawford
20190226_la1ère_001	BRGM Bureau de Recherches Géologiques et Minières	BRGM
20190226_la1ère_001	l’observatoire du Piton de la Fournaise	OVPF
20190228_la1ère_001	la mission de l’Institut physique du globe de Paris	1srt IPGP campaign
20190228_la1ère_001	la première mission de l’Institut physique du globe de Paris	1srt IPGP campaign
20190228_la1ère_001	presse	Press
20190228_la1ère_001	La préfecture de Mayotte	Préfecture of Mayotte
20190228_la1ère_001	les missions scientifiques	Scientific campaigns
20190228_la1ère_001	Les techniciens de l’Institut physique du globe de Paris	Technicians from IPGP
20190228_la1ère_001	Les mahorais	Population
20190306_la1ère_001	La mission de scientifiques	Scientific mission on land
20190306_la1ère_001	des scientifiques de l’Institut du Globe de Physique de Paris	Researchers from IPGP
20190306_la1ère_001	leurs homologues travaillant pour le ministère de la transition écologique	Professionals from the Ministry of Ecological Transition and Solidarity
20190507_la1ère_001	la campagne MAYOBS	MAYOBS 1
20190507_la1ère_001	MAYOBS	MAYOBS 1
20190507_la1ère_001	plusieurs scientifiques du CNRS	Scientists from CNRS
20190507_la1ère_001	La mission scientifique	1srt IPGP campaign
20190507_la1ère_001	L’opération appelée MAYOBS	MAYOBS 1
20190507_la1ère_001	les experts*scientifiques*	Scientists involved in the campaigns
20190511_la1ère_001	Les habitants de l’île	Population
20190511_la1ère_001	Une mission scientifique	Scientific mission_MAYOBS 1
20190511_la1ère_001	Marion Dufresne	Marion Dufresne
20190516_la1ère_001	les spécialistes	Experts in seismology
20190516_la1ère_001	la population	Population
20190516_la1ère_001	le gouvernement	French State
20190516_la1ère_001	une mission scientifique	Scientific mission at sea
20190516_la1ère_001	Marion Dufresne	Marion Dufresne
20190516_la1ère_001	le préfet de Mayotte et délégué du gouvernement	Préfet of Mayotte
20190516_la1ère_001	presse	Press
20190516_la1ère_001	la mission Marion Dufresne	MAYOBS 2 on Marion Dufresne
20190516_la1ère_001	*Ministère de la Transition Ecologique et Solidaire*	Ministry of Ecological Transition and Solidarity
20190516_la1ère_001	le Gouvernement	French State
20190516_la1ère_001	la campagne océanographique réalisée par le navire Marion Dufresne	MAYOBS 2
20190516_la1ère_001	La mission	MAYOBS 2
20190516_la1ère_001	le Comité national de la recherche scientifique (CNRS)	MAYOBS 2
20190516_la1ère_001	le Bureau de recherches géologiques et minières (BRGM)	BRGM
20190516_la1ère_001	Institut de physique du globe de Paris (IPGP)	IPGP
20190516_la1ère_001	l'Institut français de recherche pour l'exploitation de la mer (IFREMER)	IFREMER
20190516_la1ère_001	l’université de la Réunion	University of La Reunion
20190516_la1ère_001	l’Institut de physique du globe de Strasbourg (IPGS)	IPGS
20190516_la1ère_001	l’Institut national de l’information géographique et forestière (IGN)	IGN
20190516_la1ère_001	l’École normale supérieure (ENS)	ENS
20190516_la1ère_001	le Centre nationale d’études spatiales (CNES)	CNES
20190516_la1ère_001	le Service hydrographique et océanographique de la marine (SHOM)	SHOM
20190516_la1ère_001	la campagne océanographique du Marion Dufresne	The oceanographic campaign with the Marion Dufresne
20190516_la1ère_001	la mission	MAYOBS 2
20190516_la1ère_001	Les scientifiques	The French scientists
20190516_la1ère_001	l'Etat	French State
20190516_la1ère_001	scientifiques	The French scientists
20190516_la1ère_001	la population mahoraise	Population
20190516_la1ère_001	les élus	Elected officials
20190516_la1ère_001	les autres acteurs impliqués	Other actors involved
20190516_la1ère_001	une mission d’appui à la planification de la sécurité civile	Mission to support civil security planning
20190516_la1ère_001	préfet	Préfet of Mayotte
20190516_la1ère_001	les élus locaux	Local elected officials
20190516_la1ère_001	Le gouvernement	French State
20190516_la1ère_001	son administration	French administration
20190516_la1ère_001	la communauté scientifique	Scientific community
20190517_la1ère_001	La mission scientifique MAYOBS de l’institut du globe de Paris	MAYOBS
20190517_la1ère_001	Marion Dufresne	Marion Dufresne
20190517_la1ère_001	les mahorais	Population
20190517_la1ère_001	Twitter	Twitter
20190517_la1ère_001	Mayotte la 1ère	Mayotte la 1ère
20190517_la1ère_001	BRGM	BRGM
20190517_la1ère_001	l'Etat	French State
20190517_la1ère_001	population	Population
20190517_la1ère_001	Un observatoire volcanique	A hypothetical observatory in Mayotte
20190517_la1ère_001	une mission d’appui à la planification de la sécurité civile	Mission to support civil security planning
20190530_la1ère_001	une mission d’appui à la planification de la sécurité civile	Mission to support civil security planning
20190530_la1ère_001	Facebook	Facebook
20190530_la1ère_001	Onze personnalités	Local personalities
20190530_la1ère_001	Twitter	Twitter
20190530_la1ère_001	Mayotte la 1ère	Mayotte la 1ère
20190530_la1ère_001	*Préfet de Mayotte*	Préfet of Mayotte
20190530_la1ère_001	le vice-rectorat	Vice-rectorate of Mayotte
20190530_la1ère_001	écoles primaires	Primary schools
20190530_la1ère_001	collèges	Junior high schools
20190530_la1ère_001	le préfet	Préfet of Mayotte
20190530_la1ère_001	plusieurs milliers d’enfants	Thousands of children
20190530_la1ère_001	leurs professeurs	Teachers in Mayotte
20190530_la1ère_001	un comité de sélection	A committee to select the volcano's name
20190530_la1ère_001	Préfet de Mayotte	Préfet of Mayotte
20190530_la1ère_001	la préfecture	Préfecture of Mayotte
20190530_la1ère_001	le comité de présélection pour l'attribution du nom	A committee to select the volcano's name
20190530_la1ère_001	les élèves de Mayotte	Schoolers in Mayotte
20190530_la1ère_001	Les onze personnalités qui choisiront le nom	Local personalities
20190530_la1ère_001	M. Siaka HAMIDOU maire de Pamandzi	Mayor of Pamandzi
20190530_la1ère_001	M. Saïd Saïd HACHIM Administrateur de système d’information géographique au Conseil Départemental	Saïd Hachim
20190530_la1ère_001	Mme Nathalie KAUFELD-SCHULER Chef du Service Interministériel de Défense et de Protection Civiles	Head of the Interdepartmental Service for Civil Defense and Protection
20190530_la1ère_001	M. Spelo RASTAMI président de l’association Shimé	President of the association Shimé
20190530_la1ère_001	M. Mahasidhou SAID alias DIHO chanteur et auteur-compositeur	Singer and songwriter Diho
20190530_la1ère_001	M. Ambass RIDJALI écrivain	Writer Ambass Ridjali
20190530_la1ère_001	M. Abdou BACO écrivain	Writer Abdou Baco
20190530_la1ère_001	Mme Mendy BENGOUBOU Chargée de mission risques sismiques et volcaniques au Ministère de la Transition Ecologique et Solidaire et sismologue au BRGM	Mendy Bengoubou
20190530_la1ère_001	Mme Mdzadzé MROIVILI chargée de mission « vie scolaire » au vice-rectorat	Mdzadzé Mroivili in charge of the School Life mission at the vice-rectorate of Mayotte
20190530_la1ère_001	Mme Sitinat BAMANA inspectrice de l’Education Nationale	An inspector of the National Education
20190530_la1ère_001	Mme Marie DUCLOS assistante de prévention et de sécurité au collège de Koungou	An assistant of prevention and security at the college of Koungou
20190604_la1ère_001	la mission de la sécurité civile	Mission for civil protection
20190604_la1ère_001	La mission de la sécurité civile	Mission for civil protection
20190604_la1ère_001	la population	Population
20190604_la1ère_001	une mission spéciale de la Sécurité civile	Special mission for civil protection
20190604_la1ère_001	le ministère de l'intérieur	Ministry of Interior
20190604_la1ère_001	cette mission	Special mission for civil protection
20190604_la1ère_001	Journal de Mayotte	Journal of Mayotte
20190604_la1ère_001	les spécialistes	Experts in civil protection
20190611_la1ère_001	Marion Dufresne	Marion Dufresne
20190611_la1ère_001	Nouvelle mission scientifique	New scientific mission at sea
20190611_la1ère_001	la nouvelle mission scientifique	New scientific mission at sea
20190611_la1ère_001	Twitter	Twitter
20190611_la1ère_001	Prefet de Mayotte	Préfet of Mayotte
20190611_la1ère_001	Nouvelle campagne en mer	New scientific mission at sea
20190611_la1ère_001	Une nouvelle mission scientifique	New scientific mission at sea
20190611_la1ère_001	Des scientifiques de l'Institut Français de Recherche pour l'Exploitation de la Mer (Ifremer)	Scientists from IFREMER
20190611_la1ère_001	*Des scientifiques de*l'Institut de Physique du Globe de Paris (IPGP)	Scientists from IPGP
20190611_la1ère_001	*Des scientifiques du*Centre National de la Recherche Scientifique (CNRS)	Scientists from CNRS
20190611_la1ère_001	*Des scientifiques du*Bureau des Recherches Géologiques et Minières (BRGM)	Scientists from BRGM
20190611_la1ère_001	Stephan Jorry (Ifremer)	Stephan Jorry
20190611_la1ère_001	la première mission de mai 2019	MAYOBS 1
20190611_la1ère_001	la nouvelle mission scientifique	New scientific mission at sea
20190611_la1ère_001	une nouvelle campagne scientifique	New scientific mission at sea
20190611_la1ère_001	Unidentified	Unidentified
20190611_la1ère_001	les scientifiques	Scientific community
20190611_la1ère_001	270 000 habitants	Population
20190611_la1ère_001	Le Gouvernement	French State
20190611_la1ère_001	scientifiques	Scientists in MAYOBS
20190611_la1ère_001	représentant de l’Etat	Préfet of Mayotte
20190611_la1ère_001	La population	Population
20190611_la1ère_001	les réseaux sociaux	Social medias
20190611_la1ère_001	habitants	Population
20190611_la1ère_001	La nouvelle mission	New scientific mission at sea
20190611_la1ère_001	la première mission de mai 2019	MAYOBS 1
20190611_la1ère_001	Cette nouvelle mission scientifique	New scientific mission at sea
20190611_la1ère_001	la préfecture de Mayotte	Préfecture of Mayotte
20190611_la1ère_001	La population de Mayotte	Population
20190611_la1ère_001	la communauté scientifique mondiale	Scientific community
20190611_la1ère_001	Twitter	Twitter
20190611_la1ère_001	Mayotte la 1ère	Mayotte la 1ère
20190611_la1ère_001	Une nouvelle mission scientifique	New scientific mission at sea
20190611_la1ère_001	*BRGM*	BRGM
20190611_la1ère_001	*Préfecture de Mayotte*	Préfecture of Mayotte
20190624_la1ère_001	la seconde campagne océanographique	MAYOBS 2
20190624_la1ère_001	Plusieurs chercheurs	Scientists involved in the campaigns
20190624_la1ère_001	une seconde campagne océanographique intitulée «MAYOBS2»	MAYOBS 2
20190624_la1ère_001	le ministère de l’Enseignement supérieur de la recherche et de l’Innovation	Ministry of Higher Education Research and Innovation
20190624_la1ère_001	le ministère de la Transition écologique et solidaire	Ministry of Ecological Transition and Solidarity
20190624_la1ère_001	le ministère de l’Intérieur	Ministry of Interior
20190624_la1ère_001	le ministère des Outre-mer	Ministry of Overseas
20190624_la1ère_001	IPGP - institut physique du globe de Paris	IPGP
20190624_la1ère_001	IPGS – institut physique du globe de Strasbourg	IPGS
20190624_la1ère_001	BRGM – bureau de recherches géologiques et minières	BRGM
20190624_la1ère_001	IFREMER - institut français de recherche pour l'exploitation de la mer	IFREMER
20190624_la1ère_001	plusieurs chercheurs	Scientists involved in the campaigns
20190624_la1ère_001	une seconde campagne océanographique intitulée «MAYOBS2»	MAYOBS 2
20190624_la1ère_001	Stephan Jorry de l’IFREMER	Stephan Jorry
20190624_la1ère_001	les scientifiques embarqués	Scientists in MAYOBS 2
20190624_la1ère_001	Romuald Daniel (IPGP/CNRS)	Romuald Daniel
20190624_la1ère_001	Félix Leger	Félix Leger
20190624_la1ère_001	Eric Jacques	Eric Jacques
20190624_la1ère_001	Philippe Kowalski (IPGP/CNRS)	Philippe Kowalski
20190624_la1ère_001	Anne Le Friant (IPGP/CNRS)	Anne Le Friant
20190624_la1ère_001	Manon Bikert	Manon Bikert
20190624_la1ère_001	Gaëlle Benatre	Gaëlle Benatre
20190624_la1ère_001	Anne Lemoine	Anne Lemoine
20190624_la1ère_001	Fabien Paquet	Fabien Paquet
20190624_la1ère_001	Chastity Aiken	Chastity Aiken
20190624_la1ère_001	Sylvain Bermell	Sylvain Bermell
20190624_la1ère_001	Charline Guéri	Charline Guéri
20190624_la1ère_001	Pierre Guyavarch	Pierre Guyavarch
20190624_la1ère_001	Pascal Pelleau	Pascal Pelleau
20190624_la1ère_001	cette nouvelle mission	MAYOBS 2
20190624_la1ère_001	la mission MAYOBS1	MAYOBS 1
20190624_la1ère_001	MAYOBS1	MAYOBS 1
20190624_la1ère_001	Twitter	Twitter
20190624_la1ère_001	Mayotte la 1ère	Mayotte la 1ère
20190624_la1ère_001	la seconde campagne océanographique	MAYOBS 2
20190624_la1ère_001	*BRGM*	BRGM
20190624_la1ère_001	*Préfet de Mayotte*	Préfet of Mayotte
20190624_la1ère_001	la campagne MAYOBS 1	MAYOBS 1
20190624_la1ère_002	Marion Dufresne	Marion Dufresne
20190624_la1ère_002	les scientifiques	Scientists in MAYOBS 2
20190624_la1ère_002	la dernière mission scientifique	MAYOBS 1
20190624_la1ère_002	journalistes	Journalists
20190624_la1ère_002	Dominique Sorain le préfet	Préfet of Mayotte
20190624_la1ère_002	Stéphan Jorry le chef de la mission scientifique	Stephan Jorry
20190624_la1ère_002	MAYOBS2	MAYOBS 2
20190624_la1ère_002	équipe de Stéphan Jorry	Stephan Jorry's team
20190624_la1ère_002	le scientifique	Stephan Jorry
20190624_la1ère_002	Stéphan Jorry	Stephan Jorry
20190624_la1ère_002	Dominique Sorain	Préfet of Mayotte
20190624_la1ère_002	scientifiques	Scientists in MAYOBS 2
20190624_la1ère_002	communes	Communes
20190624_la1ère_002	La préfecture	Préfecture of Mayotte
20190624_la1ère_002	populations	Population
20190624_la1ère_002	le préfet	Préfet of Mayotte
20190624_la1ère_002	cette mission	MAYOBS 2
20190624_la1ère_002	La campagne scientifique	MAYOBS 2
20190624_la1ère_002	Dominique Sorain	Préfet of Mayotte
20190624_la1ère_002	cette mission	MAYOBS 2
20190624_la1ère_002	D'autres explorations scientifiques	Other scientific explorations
20190709_la1ère_002	les scientifiques	Scientific community
20190709_la1ère_002	Les Mahorais	Population
20190709_la1ère_002	la communauté scientifique	Scientific community
20190709_la1ère_002	habitants de Mayotte	Population
20190709_la1ère_002	le journal "Le Monde"	Le Monde
20190709_la1ère_002	Marc Chaussidon directeur de l’Institut de Physique du Globe de Paris	Marc Chaussidon
20190709_la1ère_002	M. Chaussidon	Marc Chaussidon
20190709_la1ère_002	les spécialistes français	French experts_undefined
20190709_la1ère_002	un véritable observatoire volcanologique	A hypothetical observatory in Mayotte
20190709_la1ère_002	Etat	French State
20190709_la1ère_002	les spécialistes	Experts_undefined
20190709_la1ère_002	les spécialistes	Experts_undefined
20190709_la1ère_002	deux prochaines missions d'observation	2 next missions at sea
20190709_la1ère_002	lemonde.fr	Le Monde
20190709_la1ère_001	le comité	A committee to select the volcano's name
20190709_la1ère_001	préfecture	Préfecture of Mayotte
20190709_la1ère_001	vice-rectorat de Mayotte	Vice-rectorate of Mayotte
20190709_la1ère_001	le comité de présélection	A committee to select the volcano's name
20190709_la1ère_001	écoles élémentaires	Primary schools
20190709_la1ère_001	collèges	Junior high schools
20190709_la1ère_001	internautes	Internet users
20190709_la1ère_001	réseaux sociaux	Social medias
20190709_la1ère_001	Twitter	Twitter
20190709_la1ère_001	Mayotte la 1ère	Mayotte la 1ère
20190709_la1ère_001	*habitants de* Mayotte	Population
20190709_la1ère_001	BRGM	BRGM
20190709_la1ère_001	Facebook	Facebook
20190709_la1ère_001	internautes	Internet users
20190709_la1ère_001	écoles	Schools
20190709_la1ère_001	collèges	Junior high schools
20190714_la1ère_001	Saïd Saïd Hachim	Saïd Hachim
20190714_la1ère_001	mission MAYOBS 3	MAYOBS 3
20190714_la1ère_001	Marion Dufresne	Marion Dufresne
20190714_la1ère_001	Une nouvelle mission scientifique MAYOBS 3	MAYOBS 3
20190714_la1ère_001	Le géographe Saïd Saïd Hachim	Saïd Hachim
20190714_la1ère_001	2 missions scientifiques	2 scientific missions at sea
20190714_la1ère_001	institutions nationales	French scientific institutions
20190714_la1ère_001	Institut de recherche intégré en sciences marines (IFREMER)	IFREMER
20190714_la1ère_001	Le Centre national de la recherche scientifique (CNRS)	CNRS
20190714_la1ère_001	l'institut de physique du globe de Paris (IPGP)	IPGP
20190714_la1ère_001	le Bureau de recherches géologiques et minières (BRGM)	BRGM
20190714_la1ère_001	Unidentified	Unidentified
20190714_la1ère_001	ces équipes de scientifiques dans les missions	Scientific teams in MAYOBS
20190714_la1ère_001	communauté internationale	International community
20190714_la1ère_001	la France	French State
20190714_la1ère_001	communauté scientifique internationale	Scientific community
20190714_la1ère_001	Unidentified	Unidentified
20190714_la1ère_001	des personnes qui veulent contribuer	People eager to contribute
20190714_la1ère_001	Le géographe Mahorais	Saïd Hachim
20190714_la1ère_001	Atlas des Risques de Mayotte	Atlas des Risques de Mayotte
20190714_la1ère_001	population	Population
20190714_la1ère_001	Dominique Sorain	Préfet of Mayotte
20190714_la1ère_002	Said Said Hachim	Saïd Hachim
20190714_la1ère_002	Marion Dufresne	Marion Dufresne
20190714_la1ère_002	nouvelles campagnes océanographiques	New oceanographic campaigns
20190714_la1ère_002	campagne océanographique "MAYOBS1"	MAYOBS 1
20190714_la1ère_002	campagne océanographique "MAYOBS2"	MAYOBS 2
20190714_la1ère_002	deux nouvelles missions scientifiques	2 scientific missions at sea
20190714_la1ère_002	Une première campagne "MAYOBS3"	MAYOBS 3
20190714_la1ère_002	Isabelle Thinon du BRGM	Isabelle Thinon
20190714_la1ère_002	cinq scientifiques	Scientists in MAYOBS 3
20190714_la1ère_002	Michael ROUDAUT (Ifremer – Ins&tut Français de Recherche pour l’Exploita&on de la Mer)	Michael Roudaut
20190714_la1ère_002	Pierre GUYAVARCH (Ifremer)	Pierre Guyavarch
20190714_la1ère_002	Eric JACQUES (IPGP – Ins&tut Physique du Globe de Paris)	Eric Jacques
20190714_la1ère_002	Jean-Marie SAUREL (IPGP)	Jean-Marie Saurel
20190714_la1ère_002	Arnaud LE MARCHAND (IPGP)	Arnaud Lemarchand
20190714_la1ère_002	Une seconde campagne "MAYOBS4"	MAYOBS 4
20190714_la1ère_002	le géographe Said Hachim	Saïd Hachim
20190714_la1ère_002	Saïd Saïd Hachim	Saïd Hachim
20190714_la1ère_002	programme INSU TELLUS MAYOTTE	TelluS Mayotte
20190714_la1ère_002	ministère de la recherche	Ministry of Higher Education Research and Innovation
20190714_la1ère_002	ministère de la transition écologique et solidaire	Ministry of Ecological Transition and Solidarity
20190714_la1ère_002	instituts impliqués (IPGP IPGS BRGM IFREMER)	Institutes from REVOSIMA
20190714_la1ère_002	équipe scientifique de l'IPGP	Team from IPGP
20190714_la1ère_002	navire océanographique Marion Dufresne	Marion Dufresne
20190714_la1ère_002	campagne MAYOBS	MAYOBS
20190714_la1ère_002	population	Population
20190714_la1ère_002	population mahoraise	Population
20190714_la1ère_002	Lemoine et al 2019	Lemoine et al 2019
20190714_la1ère_002	projet SISMAYOTTE	SISMAORE
20190714_la1ère_002	BRGM	BRGM
20190714_la1ère_002	IPGS	IPGS
20190714_la1ère_002	IPGP/OVSG	IPGP_OVSG
20190714_la1ère_002	INSU	INSU
20190714_la1ère_002	IPGP	IPGP
20190714_la1ère_002	navire Ylang	Ylang ship
20190714_la1ère_002	campagne Bathymay	BathyMay
20190714_la1ère_002	SHOM	SHOM
20190714_la1ère_002	Catalogue BRGM	BRGM seismic catalog
20190714_la1ère_002	catalogue USGS	USGS catalog
20190714_la1ère_002	navire océanographique Marion Dufresne	Marion Dufresne
20190718_la1ère_001	Marion Dufresne	Marion Dufresne
20190718_la1ère_001	Une nouvelle mission intitulée "Mayobs4"	MAYOBS 4
20190718_la1ère_001	navire Marion Dufresne	Marion Dufresne
20190718_la1ère_001	Les scientifiques	Scientific community
20190718_la1ère_001	Marc Chaussidon	Marc Chaussidon
20190721_la1ère_001	"MAYOBS4"	MAYOBS 4
20190721_la1ère_001	le géographe Saïd Saïd Hachim	Saïd Hachim
20190721_la1ère_001	le géographe Said Said Hachim	Saïd Hachim
20190721_la1ère_001	MAYOBS3	MAYOBS 3
20190721_la1ère_001	réseaux sociaux	Social medias
20190721_la1ère_001	Marion Dufresne	Marion Dufresne
20190721_la1ère_001	campagne océanographique MAYOBS4	MAYOBS 4
20190721_la1ère_001	campagne MAYOBS4	MAYOBS 4
20190721_la1ère_001	Mayotte la 1ère Radio	Mayotte la 1ère radio
20190721_la1ère_001	directeur de cabinet de la préfecture	Chief of staff of the Préfecture
20190721_la1ère_001	Said Hachim	Saïd Hachim
20190721_la1ère_001	la physicienne Nathalie Feuillet de l’Institut de physique du globe de Paris	Nathalie Feuillet
20190721_la1ère_001	les mahorais	Population
20190721_la1ère_001	journalistes locaux	Local journalists
20190721_la1ère_001	presse nationale	National press
20190721_la1ère_001	presse internationale	International press
20190721_la1ère_001	habitants de Mayotte	Population
20190721_la1ère_001	Les mahorais	Population
20190721_la1ère_001	les mahorais	Population
20190721_la1ère_001	Said Hachim	Saïd Hachim
20190731_la1ère_001	Nathalie Feuillet	Nathalie Feuillet
20190731_la1ère_001	scientifiques embarqués	Scientists involved in the campaigns
20190731_la1ère_001	mission "Mayobs4"	MAYOBS 4
20190731_la1ère_001	Nathalie Feuillet de l'Institut de Physique du Globe de Paris	Nathalie Feuillet
20190731_la1ère_001	la chercheuse	Nathalie Feuillet
20190731_la1ère_001	laboratoire de Brest	A lab in Brest
20190731_la1ère_001	Nathalie Feuillet	Nathalie Feuillet
20190731_la1ère_001	La physicienne Nathalie Feuillet	Nathalie Feuillet
20190731_la1ère_001	prochaines missions	Next missions at sea
20190731_la1ère_001	La physicienne	Nathalie Feuillet
20190731_la1ère_001	communauté scientifique	Scientific community
20190731_la1ère_001	chercheurs*non défini*	Scientists_undefined
20190731_la1ère_001	scientifiques	Scientific community
20190731_la1ère_001	quatre missions	Scientific missions at sea
20190731_la1ère_001	Marion Dufresne	Marion Dufresne
20190801_la1ère_001	Saïd Saïd Hachim	Saïd Hachim
20190801_la1ère_001	Le géographe Said Said Hachim	Saïd Hachim
20190801_la1ère_001	mission Mayobs 4	MAYOBS 4
20190801_la1ère_001	*Saïd Hachim*	Saïd Hachim
20190801_la1ère_001	le préfet *Dominique Sorain*	Préfet of Mayotte
20190801_la1ère_001	chef de mission scientifique Nathalie Feuillet	Nathalie Feuillet
20190801_la1ère_001	préfecture	Préfecture of Mayotte
20190801_la1ère_001	directeur de cabinet du préfet Etienne Guillet	Chief of staff of the Préfecture
20190801_la1ère_001	ministère de l'écologie	Ministry of Ecological Transition and Solidarity
20190801_la1ère_001	Conseil Départemental	Departmental council
20190801_la1ère_001	Said Hachim	Saïd Hachim
20190801_la1ère_001	le directeur de cabinet Housseini Ahamada	Chief of staff of the Préfecture
20190801_la1ère_001	Said Said Hachim	Saïd Hachim
20190801_la1ère_001	scientifiques embarqués	Scientists involved in the campaigns
20190801_la1ère_001	mahorais	Population
20190801_la1ère_001	réseaux sociaux	Social medias
20190801_la1ère_001	Facebook	Facebook
20190801_la1ère_001	un mahorais	Population
20190808_la1ère_001	envoyés du groupe Facebook S.T.T.M	STTM spokepersons
20190808_la1ère_001	préfecture	Préfecture of Mayotte
20190808_la1ère_001	membres de la délégation du groupe Facebook S.T.T.M	STTM spokepersons
20190808_la1ère_001	Des représentants du groupe Facebook Signalement Tremblement de Terre Mayotte	STTM spokepersons
20190808_la1ère_001	Ses membres	STTM members
20190808_la1ère_001	autorités	Authorities
20190808_la1ère_001	Marion Dufresne	Marion Dufresne
20190808_la1ère_001	journalistes	Journalists
20190808_la1ère_001	Deux personnes refoulées	Two people denied from onboarding
20190808_la1ère_001	membres du groupe Facebook S.T.T.M	STTM members
20190808_la1ère_001	Camille Seker une des internaute empêchée d’entrer sur le Marion Dufresne	STTM spokeperson
20190808_la1ère_001	groupe *STTM*	STTM
20190808_la1ère_001	le groupe Facebook	STTM
20190808_la1ère_001	Camille Seker	STTM spokeperson
20190808_la1ère_001	préfecture	Préfecture of Mayotte
20190808_la1ère_001	*groupe STTM*	STTM
20190808_la1ère_001	six représentants du groupe Facebook	STTM spokepersons
20190808_la1ère_001	directeur adjoint du SIDPC	Deputy Director of SIDPC
20190808_la1ère_001	directeur régional du BRGM	Frédéric Tronel
20190808_la1ère_001	sous-préfet Julien Kerdoncuff	Chief of staff of the Préfecture
20190808_la1ère_001	représentants du groupe STTM	STTM spokepersons
20190808_la1ère_001	Bruno Perrin un membre très actif du groupe	STTM spokeperson
20190808_la1ère_001	site internet *de la préfecture*	Website of Préfecture of Mayotte
20190808_la1ère_001	villages	Villages in Mayotte
20190808_la1ère_001	mairies	Municipalities of Mayotte
20190808_la1ère_001	Bruno Perrin	STTM spokeperson
20190808_la1ère_001	scientifiques	Scientific community
20190808_la1ère_001	STTM	STTM
20190808_la1ère_001	groupe Facebook	STTM
20190825_la1ère_001	ministre des Outre-mer Annick Girardin	Minister of Overseas
20190825_la1ère_001	secrétaire d’état auprès du Premier ministre porte-parole du Gouvernement Sibeth Ndiaye	Governement state secretary
20190825_la1ère_001	ministre des outre-mer Annick Girardin	Minister of Overseas
20190825_la1ère_001	porte-parole du gouvernement Sibeth Ndiaye	Governement state secretary
20190825_la1ère_001	Madame Annick Girardin	Minister of Overseas
20190825_la1ère_001	Madame Sibeth Ndiaye	Governement state secretary
20190825_la1ère_001	habitants	Population
20190825_la1ère_001	maire	Municipality of Bandrélé
20190825_la1ère_001	enfants	Children
20190825_la1ère_001	professeurs	Teachers in Mayotte
20190825_la1ère_001	parents	Parents in Mayotte
20190825_la1ère_001	lycée de Kahani	High school in Kahani
20190825_la1ère_001	collège de Kwalé	Junior high school in Kwalé
20190825_la1ère_001	école de Pamandzi 2	School of Pamandzi 2
20190902_la1ère_001	habitants	Population
20190902_la1ère_001	Laurent Floch le responsable du centre météorologique de Mayotte	Laurent Floch
20190902_la1ère_001	Hachim Said Hachim géographe	Saïd Hachim
20190902_la1ère_001	Les communes	Communes
20190902_la1ère_001	réseaux sociaux	Social medias
20190902_la1ère_001	Bruno Perrin un membre actif du groupe STTM Mayotte	STTM spokeperson
20190902_la1ère_001	préfecture	Préfecture of Mayotte
20190902_la1ère_001	internet	Internet
20190902_la1ère_001	Mohamed Moindjié l’adjoint au maire chargé de l’aménagement	Deputy mayor in charge of development in Mamoudzou
20190902_la1ère_001	gens	Population
20190902_la1ère_001	Mansour Kamardine le député de Mayotte	Mayotte's deputy Mansour Kamardine
20190902_la1ère_001	ministre des outre-mer	Minister of Overseas
20190902_la1ère_001	gouvernement	French State
20190902_la1ère_001	Etat	French State
20190902_la1ère_001	communes	Communes
20190902_la1ère_001	population	Population
20190925_la1ère_001	acteurs	Involved actors
20190925_la1ère_001	préfecture de Mayotte	Préfecture of Mayotte
20190925_la1ère_001	préfet de Mayotte	Préfet of Mayotte
20190925_la1ère_001	ensemble des acteurs institutionnels concernés	Involved institutional actors
20190925_la1ère_001	population	Population
20190925_la1ère_001	État	French State
20190925_la1ère_001	préfet	Préfet of Mayotte
20190925_la1ère_001	communes	Communes
20190925_la1ère_001	équipes des communes	Communes' staffs
20190925_la1ère_001	services de l'État	State services
20190925_la1ère_001	habitants	Population
20190925_la1ère_001	usagers	Mahorese facility users
20190925_la1ère_001	préfecture	Préfecture of Mayotte
20191106_la1ère_001	vice-recteur Gilles Halbout	Vice-rector of Mayotte
20191106_la1ère_001	ministère de l'Enseignement supérieur de la Recherche et de l'Innovation	Ministry of Higher Education Research and Innovation
20191106_la1ère_001	grand public	The public
20191106_la1ère_001	vice-rectorat	Vice-rectorate of Mayotte
20191106_la1ère_001	ses nombreux partenaires*du rectorat*	Vice-rectorate's partners
20191106_la1ère_001	les participants	Participants at the Science Festival in Mayotte
20191106_la1ère_001	nombreux établissements scolaires	Numerous schools
20191106_la1ère_001	MAYOBS 2	MAYOBS 2
20191106_la1ère_001	Marc Chaussidon	Marc Chaussidon
20191106_la1ère_001	collège Kani-kéli	Junior high school in Kani-kéli
20191106_la1ère_001	enseignants	Teachers in Mayotte
20191106_la1ère_001	élèves	Schoolers in Mayotte
20191106_la1ère_001	Le géographe Said Hachim	Saïd Hachim
20191106_la1ère_001	groupe de recherche du centre universitaire	A research group from the university in Mayotte
20191106_la1ère_001	Grégoire Savourey Chargé de mission Biodiversité océan Indien	Head of mission Biodiversity Indian Ocean
20191112_la1ère_001	population	Population
20191112_la1ère_001	les scientifiques*monitoring*	Scientists involved in monitoring
20191112_la1ère_001	un observatoire	A hypothetical observatory in Mayotte
20191112_la1ère_001	population	Population
20191112_la1ère_001	Plusieurs missions à terre	Several missions on land
20191112_la1ère_001	CNRS	CNRS
20191112_la1ère_001	BRGM	BRGM
20191112_la1ère_001	Institut de physique du globe de Paris (IPGP)	IPGP
20191112_la1ère_001	IGN	IGN
20191112_la1ère_001	Ifremer	IFREMER
20191112_la1ère_001	ministère de la transition écologique et solidaire	Ministry of Ecological Transition and Solidarity
20200101_la1ère_001	Réseau National de Surveillance Sismique ( RéNass)	RENASS
20200101_la1ère_001	Le réseau REVOSIMA	REVOSIMA
20200101_la1ère_001	Le Réseau de surveillance Volcanologique et Sismologique de Mayotte (REVOSIMA)	REVOSIMA
20200101_la1ère_001	IPGP	IPGP
20200101_la1ère_001	BRGM	BRGM
20200101_la1ère_001	sa direction régionale à Mayotte*BRGM*	BRGM in Mayotte
20200101_la1ère_001	REVOSIMA	REVOSIMA
20200101_la1ère_001	Ifremer	IFREMER
20200101_la1ère_001	CNRS	CNRS
20200101_la1ère_001	l’IPGS	IPGS
20200101_la1ère_001	RENASS	RENASS
20200101_la1ère_001	l’IRD	IRD
20200101_la1ère_001	l’IGN	IGN
20200101_la1ère_001	ENS	ENS
20200101_la1ère_001	Université de la Réunion	University of La Reunion
20200101_la1ère_001	Université Clermont Auvergne	University of Clermont Auvergne
20200101_la1ère_001	CNES	CNES
20200101_la1ère_001	Météo France	Météo France
20200101_la1ère_001	SHOM	SHOM
20200103_la1ère_001	Mahorais	Population
20200103_la1ère_001	habitants de l'île	Population
20200103_la1ère_001	Certains habitants	Population
20200103_la1ère_001	préfecture	Préfecture of Mayotte
20200103_la1ère_001	population	Population
20200107_la1ère_001	SUALA	SUALA
20200107_la1ère_001	Annick Girardin	Minister of Overseas
20200107_la1ère_001	Ministre des Outre-Mer Annick Girardin	Minister of Overseas
20200107_la1ère_001	ministre des outre-mer Annick Girardin	Minister of Overseas
20200107_la1ère_001	porte parole du gouvernement Sibeth Ndiaye	Governement state secretary
20200107_la1ère_001	Suala	SUALA
20200107_la1ère_001	*Ministre des Outre-Mer*	Minister of Overseas
20200107_la1ère_001	jeunesse Mahoraise	The youth from Mayotte
20200107_la1ère_001	les femmes	Mahorese women
20200113_la1ère_001	le monde scientifique	Scientific community
20200113_la1ère_001	Des scientifiques	Scientific community
20200113_la1ère_001	revues de renom	Renowned scientific journal
20200113_la1ère_001	médias nationaux	National media
20200113_la1ère_001	population	Population
20200113_la1ère_001	certains *unidentified_mahorais*	Population
20200113_la1ère_001	la population	Population
20200113_la1ère_001	Mohamed Moindjié, adjoint au maire de la commune de Mamoudzou	Deputy mayor in charge of development in Mamoudzou
20200113_la1ère_001	Le géographe Said Said Hachim	Saïd Hachim
20200113_la1ère_001	une campagne avec d'autres scientifiques sur le Marion Dufresne	A scientific campaign
20200113_la1ère_001	réseaux sociaux	Social medias
20200113_la1ère_001	publications scientifiques au niveau mondial	Scientific publications worldwide
20200113_la1ère_001	ces campagnes d'observation et de recherchent	Monitoring and research campaign
20200113_la1ère_001	Un observatoire volcanologique	A hypothetical observatory in Mayotte
20200213_la1ère_001	Manfou Index candidat pour la commune de Dzaoudzi-Labattoir	Candidate Manfou Index for the municipality of Dzaoudzi-Labattoir
20200213_la1ère_001	commune de Dzaoudzi-Labattoir	Commune of Dzaoudzi-Labattoir
20200213_la1ère_001	Manfou Index candicat du parti Tanafou	Tanafou political party
20200213_la1ère_001	il*Manfou Index*	Candidate Manfou Index for the municipality of Dzaoudzi-Labattoir
20200213_la1ère_001	une population dense	A dense population
20200213_la1ère_001	Police Municipale actuelle	Current municipal police
20200213_la1ère_001	policiers municipaux	Municipal policemen
20200213_la1ère_001	*policiers*de Mamoudzou	Policemen in Mamoudzou
20200213_la1ère_001	Moi*Manfou Index*	Candidate Manfou Index for the municipality of Dzaoudzi-Labattoir
20200213_la1ère_001	population	Population
20200226_la1ère_001	nouvelle campagne scientifique	New scientific campaign
20200226_la1ère_001	les pouvoirs publics	Public authorities
20200226_la1ère_001	le BRGM	BRGM
20200226_la1ère_001	collectivités concernées	Affected territorial authorities
20200226_la1ère_001	des professionnels qualifiés*manipulateurs de dynamite*	Qualified professionals in dynamite manipulation
20200226_la1ère_001	les géophysiciens du réseau de surveillance volcanologique et sismologique de Mayotte	Geophysicists from REVOSIMA
20200226_la1ère_001	le site internet de la préfecture	Préfecture of Mayotte
20200226_la1ère_001	réseaux sociaux	Social medias
20200226_la1ère_001	ces deux campagnes*SISMAORE et REFMAORE*	Those two scientific campaigns
20200308_la1ère_001	Issoufi Maandhui	Candidate Issoufi Maandhui for the municipality of Pamandzi
20200308_la1ère_001	LREM	LREM party
20200308_la1ère_001	gendarmerie	Gendarmerie
20200308_la1ère_001	rectorat	Rectorate of Mayotte
20200308_la1ère_001	*Issoufi Maandhui*	Candidate Issoufi Maandhui for the municipality of Pamandzi
20200308_la1ère_001	Notre équipe*à Issoufi Maandhui*	Candidate Issoufi Maandhuifor's team
20200308_la1ère_001	SIDEVAM	SIDEVAM
20200308_la1ère_001	la gendarmerie	Gendarmerie
20200308_la1ère_001	le rectorat	Rectorate of Mayotte
20200308_la1ère_001	la police municipale	Municipal police
20200308_la1ère_001	les personnes qui ont vu leurs maisons endommagées par les séismes	People who have seen their homes damaged by earthquakes
20200308_la1ère_001	Labattoir	Commune of Labattoir
20200308_la1ère_001	Issoufi Maandhui	Candidate Issoufi Maandhui for the municipality of Pamandzi
20200308_la1ère_001	LREM	LREM party
20200321_la1ère_001	les "confinés" de Mayotte	The confined of Mayotte
20200321_la1ère_001	tout le monde *est à la maison*	Population
20200321_la1ère_001	le réseau de surveillance volcanologique et sismologique de Mayotte	REVOSIMA
20200321_la1ère_001	les campagnes scientifiques	Scientific campaigns
20200604_la1ère_001	MAYOBS 2	MAYOBS 2
20200604_la1ère_001	Marc Chaussidon	Marc Chaussidon
20200604_la1ère_001	Deux campagnes maritimes de surveillance du volcan	Two monitoring campaigns at sea
20200604_la1ère_001	Le réseau de surveillance volcanologique et sismologique de Mayotte (REVOSIMA)	REVOSIMA
20200604_la1ère_001	deux campagnes maritimes de surveillance du volcan	Two monitoring campaigns at sea
20200604_la1ère_001	quatre ministres	Four ministers
20200604_la1ère_001	Elisabeth Borne (Transition écologique et solidaire)	Minister of Ecological Transition and Solidarity
20200604_la1ère_001	Frédérique Vidal (Enseignement supérieur)	Minister of Higher Education Research and Innovation
20200604_la1ère_001	Annick Girardin (Outremer)	Minister of Overseas
20200604_la1ère_001	Florence Parly (Armées)	Minister of Armies
20200604_la1ère_001	La première campagne Mayobs 13-2	MAYOBS 13-2
20200604_la1ère_001	La deuxième campagne Mayobs 13-1	MAYOBS 13-1
20200610_la1ère_001	CRESTAR_L'EOLIENNE	CRESTAR_L'EOLIENNE
20200610_la1ère_001	Mayotte la 1ère	Mayotte la 1ère
20200610_la1ère_001	le monde scientifique	Scientific community
20200610_la1ère_001	la population	Population
20200610_la1ère_001	des scientifiques*campaigns*	Scientists involved in the campaigns
20200610_la1ère_001	Mahorais	Population
20200610_la1ère_001	Les Mahorais	Population
20200610_la1ère_001	des scientifiques*campaigns*	Scientists involved in the campaigns
20200610_la1ère_001	*les scientifiques du*navire océanographique Marion-Dufresne	Marion Dufresne
20200610_la1ère_001	Un documentaire de 52 minutes	A documentary of 52 minutes
20200610_la1ère_001	Pascal Crésegut	Filmmaker Pascal Crésegut
20200610_la1ère_001	Bruno Sevaistre	Screenwriter Bruno Sevaistre
20200610_la1ère_001	Crestar Productions/L’éolienne	CRESTAR_L'EOLIENNE
20200630_la1ère_001	MAYOBS 2	MAYOBS 2
20200630_la1ère_001	Marc Chaussidon	Marc Chaussidon
20200630_la1ère_001	nouvelle campagne de recherches	New scientific campaign
20200630_la1ère_001	Bureau de Recherches Géologiques et Minières (BRGM)	BRGM
20200630_la1ère_001	Les scientifiques	Scientific community
20200630_la1ère_001	une seconde campagne*MT-MAY?*	A study of seismic refraction
20200630_la1ère_001	Cette campagne*MT-MAY?*	A study of seismic refraction
20200630_la1ère_001	documentaire de 52 minutes "Mayotte, naissance d'un volcan"	Documentary Birth of a Volcano
20200925_la1ère_001	réseau de surveillance volcanologique et sismologique de Mayotte (REVOSIMA)	REVOSIMA
20200925_la1ère_001	REVOSIMA	REVOSIMA
20200925_la1ère_001	habitants	Population
20201013_la1ère_001	Le BRGM (Bureau de recherches géologiques et minières)	BRGM
20201013_la1ère_001	REFMAORE	REFMAORE
20201013_la1ère_001	le BRGM	BRGM
20201013_la1ère_001	Des scientifiques	Scientists in REFMAORE
20201013_la1ère_001	le bureau de recherches géologiques et minières	BRGM
20201013_la1ère_001	Jean-Michel Baltasat, responsable des opérations à terre de la campagne REFMAORE	Jean-Michel Baltassat
20201013_la1ère_001	Jean François Jaccard, directeur technique de la société Titanobel	Technical director of the company Titanobel
20201013_la1ère_001	navire Marion Dufresne	Marion Dufresne
20201016_la1ère_001	autorités	Authorities
20201016_la1ère_001	l’Etat	French State
20201016_la1ère_001	municipalités concernées	Affected municipalities
20201016_la1ère_001	populations installées en bord de mer	Populations settled in the seaside
20201016_la1ère_001	la Deal	DEAL
20201016_la1ère_001	Mayotte la 1ère	Mayotte la 1ère
20201016_la1ère_001	La préfecture	Préfecture of Mayotte
20201016_la1ère_001	maires concernés	Affected mayors
20201016_la1ère_001	services de l'état	State services
20201016_la1ère_001	Le service de transport maritime	Marine transportation service in Mayotte
20201016_la1ère_001	des usagers*du service de transport maritime*	Users of the maritime transport service
20201016_la1ère_001	des personnel*du service de transport maritime*	Maritime transport service'staff
20201016_la1ère_001	Les autorités	Authorities
20201016_la1ère_001	préfet de Mayotte	Préfet of Mayotte
20201016_la1ère_001	population	Population
20201016_la1ère_001	services gestionnaires des routes	Road management services
20201016_la1ère_001	enfants	Children
20201016_la1ère_001	mairie	Municipalities
20201027_la1ère_001	grand public	The public
20201027_la1ère_001	les premiers scientifiques accourus dans l'île	The first scientists who came to the island
20201027_la1ère_001	navire océanographique "Marion Dufresne"	Marion Dufresne
20201027_la1ère_001	Le Marion Dufresne	Marion Dufresne
20201027_la1ère_001	les autorités	Authorities
20201027_la1ère_001	la population	Population
20201027_la1ère_001	Plusieurs scientifiques participant aux multiples études sur le volcan de Mayotte	Scientists from REVOSIMA
20201027_la1ère_001	public	The public
20201027_la1ère_001	les savants	The scholars
20201029_la1ère_001	Zakweli	Zakweli
20201029_la1ère_001	Charlotte Mucig directrice du BRGM de Mayotte	Charlotte Mucig
20201029_la1ère_001	*Charlotte Mucig*	Charlotte Mucig
20201029_la1ère_001	Lycée de Mamoudzou Nord	High school of Mamoudzou Nord
20201029_la1ère_001	la préfecture	Préfecture of Mayotte
20201029_la1ère_001	élèves mahorais	Schoolers in Mayotte
20201030_la1ère_001	la population	Population
20201030_la1ère_001	El-Raouf*Mayotte la 1ère*	Mayotte la 1ère
20201030_la1ère_001	de nombreuses notamment associatives	Numerous associations
20201030_la1ère_001	scientifiques du monde entier	Worldwide scientists
20201030_la1ère_001	la préfecture	Préfecture of Mayotte
20201030_la1ère_001	le rectorat de Mayotte	Rectorate of Mayotte
20201030_la1ère_001	le professeur Eric Humler	Eric Humler
20201030_la1ère_001	Luca Vergallo du cabinet du Préfet	Luca Vergallo from the Prefect's Office
20201030_la1ère_001	Rastami Spelo, président de l'association SHIME	President of the association Shimé
20201030_la1ère_001	les jeunes	The youth from Mayotte
20201030_la1ère_001	recteur de Mayotte, Gilles Halbout	Vice-rector of Mayotte
20201030_la1ère_001	Faoullia	Faoullia in charge of the Research Innovation mission at the rectorate
20201030_la1ère_001	1er Adjoint au Maire de Pamandzi	1st Deputy Mayor of Pamandzi
20201030_la1ère_001	Professeur Eric Humler, directeur scientifique du REVOSIMA	Eric Humler
20201030_la1ère_001	Carole Berthod, chercheur au laboratoire Magmas et volcans à Clermont Ferrand (OPGC)	Carole Berthod
20201030_la1ère_001	le public	The public
20201030_la1ère_001	les scientifiques venus de l'hexagone	Scientists from mainland France
20201030_la1ère_001	Des scientifiques*in school*	Scientists visiting a school in Mayotte
20201030_la1ère_001	la population	Population
20201030_la1ère_001	les Mahorais	Population
20201030_la1ère_001	l’Institut de Physique du Globe de Paris	IPGP
20201030_la1ère_001	un réseau de surveillance REVOSIMA	REVOSIMA
20201030_la1ère_001	le BRGM le bureau de recherche géologique et minière	BRGM
20201030_la1ère_001	Saïd Hachim, géographe	Saïd Hachim
20201030_la1ère_001	Frédéric Mortier, délégué interminsteriel aux risques majeurs Outre-mer	Frédéric Mortier from the DIRMOM
20201031_la1ère_001	Zakweli	Zakweli
20201031_la1ère_001	Frédéric Mortier délégué interministériel aux risques majeurs en outremer	Frédéric Mortier from the DIRMOM
20201031_la1ère_001	le Professeur Eric Humler du CNRS	Eric Humler
20201031_la1ère_001	Lycée Mamoudzou-Nord	High school of Mamoudzou Nord
20201031_la1ère_001	Frédéric Mortier	Frédéric Mortier from the DIRMOM
20201031_la1ère_001	élèves	Schoolers in Mayotte
20201031_la1ère_001	Pr Eric Humler	Eric Humler
20201031_la1ère_001	les mahorais	Population
20201031_la1ère_001	le Pr Humler	Eric Humler
20201031_la1ère_001	population	Population
20201031_la1ère_001	*Frédéric Mortier*	Frédéric Mortier from the DIRMOM
20201031_la1ère_001	*Eric Humler*	Eric Humler
20201031_la1ère_001	les plus petits	The youngest
20201031_la1ère_001	écoles des Antilles	Schools in the Antilles
20201031_la1ère_001	écoles du Japon	Schools in Japon
20201103_la1ère_001	préfecture de Mayotte	Préfecture of Mayotte
20201103_la1ère_001	la mission MAYOBS 15	MAYOBS 15
20201103_la1ère_001	le REVOSIMA, le Réseau de surveillance Volcanologique et Sismologique de Mayotte	REVOSIMA
20201103_la1ère_001	Fatima SOUFFOU, première vice-présidente du Conseil départemental	1st vice-president of the Departmental Council
20201103_la1ère_001	Frédéric MORTIER, délégué interministériel aux risques majeurs Outre-Mer	Frédéric Mortier from the DIRMOM
20201103_la1ère_001	les scientifiques	Scientists from REVOSIMA
20201103_la1ère_001	Musée de Mayotte	Museum of Mayotte
20201103_la1ère_001	la population de Mayotte	Population
20201103_la1ère_001	prefecture de Mayotte	Préfecture of Mayotte
20201103_la1ère_001	la préfecture	Préfecture of Mayotte
20201103_la1ère_001	le rectorat	Rectorate of Mayotte
20201103_la1ère_001	Mahorais	Population
20201103_la1ère_001	les scientifiques	Scientists from REVOSIMA
20201103_la1ère_001	160 professeurs de SVT de l'île	SVT teachers on the island
20201110_la1ère_001	Fahar Ousseni	A journalist at France TV
20201110_la1ère_001	REVOSIMA	REVOSIMA
20201110_la1ère_001	rapport préliminaire du REVOSIMA (Réseau de surveillance Volcanologique et Sismologique de Mayotte	Preliminary report of REVOSIMA
20201110_la1ère_002	le rapport préliminaire du réseau de surveillance volcanologique et sismologique de Mayotte	Preliminary report of REVOSIMA
20201110_la1ère_002	Twitter	Twitter
20201110_la1ère_002	Préfet de Mayotte	Préfet of Mayotte
20201110_la1ère_002	réseau de surveillance volcanologique et sismologique de Mayotte (REVOSIMA)	REVOSIMA
20201120_la1ère_001	Nailane Attoumani	General Secretary of the Mahorese Federation of Environmental Associations
20201120_la1ère_001	village relais	The relay village
20201120_la1ère_001	Zakweli	Zakweli
20201120_la1ère_001	Nailane Attoumani – Attibou secrétaire général de la Fédération Mahoraise des Associations Environnementales (FMAE)	General Secretary of the Mahorese Federation of Environmental Associations
20201120_la1ère_001	des gens	Population
20201120_la1ère_001	village-relais	The relay village
20201120_la1ère_001	le responsable environnemental	General Secretary of the Mahorese Federation of Environmental Associations
20201211_la1ère_001	le géographe Said Said Hachim	Saïd Hachim
20201211_la1ère_001	Zakweli	Zakweli
20201211_la1ère_001	Said Said Hachim	Saïd Hachim
20201211_la1ère_001	la population	Population
20201211_la1ère_001	entreprises françaises	French enterprises
20201211_la1ère_001	comité chargé du projet de piste longue	Long runway project committee
20201211_la1ère_001	le géographe	Saïd Hachim
20201211_la1ère_001	«l’Atlas des risques naturels et es vulnérabilités de Mayotte »	Atlas des Risques de Mayotte
20201223_la1ère_001	SISMAORE, une nouvelle campagne scientifique	SISMAORE
20201223_la1ère_001	nouvelle campagne océanographique nommée SISMAORE	SISMAORE
20201223_la1ère_001	Le Pourquoi Pas?	Le Pourquoi Pas
20201223_la1ère_001	Cette campagne*SISMAORE*	SISMAORE
20201223_la1ère_001	Deux enseignants de SVT	Life science teachers onboard
20201223_la1ère_001	élèves de l'académie de Mayotte	Students from the academy of Mayotte
20201223_la1ère_001	blogue http://sismaore.ac-mayotte.fr/	Website of the SISMAORE blog
20201223_la1ère_001	l'équipe SISMAORE	Scientific team in SISMAORE
20201223_la1ère_001	les membres des équipes scientifiques*SISMAORE*	Scientific team in SISMAORE
20201223_la1ère_001	*membres SISMAORE*de l'équipage	Crew of SISMAORE
20210303_la1ère_001	le réseau de surveillance	REVOSIMA
20210303_la1ère_001	habitants	Population
20210303_la1ère_001	le réseau de surveillance sismologique de Mayotte	REVOSIMA
20210303_la1ère_001	la directrice du Bureau de Recherches Géologiques de Mayotte Charlotte Mucig	Charlotte Mucig
20210303_la1ère_001	BRGM	BRGM
20210303_la1ère_001	population	Population
20210303_la1ère_001	Charlotte Mucig	Charlotte Mucig
20210303_la1ère_001	Le réseau de surveillance	REVOSIMA
20210426_la1ère_001	le géographe Saïd Hachim	Saïd Hachim
20210426_la1ère_001	les équipes de recherche autours du volcan	Scientists from REVOSIMA
20210426_la1ère_001	le comité scientifique du REVOSIMA	Scientific committee of REVOSIMA
20210426_la1ère_001	le géographe*Saïd Hachim*	Saïd Hachim
20210426_la1ère_001	les scientifiques	Scientists from REVOSIMA
20210426_la1ère_001	responsables ministériels	Ministries' officials
20210426_la1ère_001	l'Institut de physique du globe de Paris	IPGP
20210426_la1ère_001	le géographe	Saïd Hachim
20210426_la1ère_001	la première mission MAY OBS	MAYOBS
20210426_la1ère_001	MayObs 3	MAYOBS 3
20210426_la1ère_001	Saïd Hachim	Saïd Hachim
20210426_la1ère_001	expert*Saïd Hachim*	Saïd Hachim
20210426_la1ère_001	*Unidentified*	Unidentified
20210426_la1ère_001	l'Atlas des risques naturels et des vulnérabilités territoriales de Mayotte	Atlas des Risques de Mayotte
20210426_la1ère_001	Professeur Frédéric Leone	Frédéric Leone
20210426_la1ère_001	comité scientifique*du REVOSIMA*	Scientific committee of REVOSIMA
20210426_la1ère_001	Le géographe	Saïd Hachim
20180602_Monde_001	Le département	Department of Mayotte
20180602_Monde_001	ORNELLA LAMBERTI / AFP	AFP
20180602_Monde_001	Les spécialistes	Experts_undefined
20180602_Monde_001	le relevé du Bureau de recherches géologiques et minières (BRGM)	BRGM
20180602_Monde_001	Sénat	Senate
20180602_Monde_001	le sénateur de Mayotte Thani Mohamed Soilihi (LRM)	Mayotte's deputy Thani Mohamed Soilihi
20180602_Monde_001	la ministre*Jacqueline Gourault*	Minister for Territorial Cohesion and Relations with Territorial Communities
20180602_Monde_001	une mission d'expertise	Interdepartmental expertise mission in June 2018
20180602_Monde_001	ministre de l'intérieur	Minister of Interior
20180602_Monde_001	spécialistes de la sécurité civile	Mission for civil protection
20180602_Monde_001	scientifiques	Scientists from REVOSIMA
20180602_Monde_001	Le président du conseil départemental Soibahadine Ibrahim Ramadani (LR)	President of the departmental council
20180602_Monde_001	premier ministre	Prime Minister
20180602_Monde_001	une cellule psychologique	Psychological support cell
20180602_Monde_001	population	Population
20180602_Monde_001	le président de l'Union départementale des associations familiales Ali Nizary	President of UDAF
20180602_Monde_001	les autorités préfectorales	Authorities of the Préfecture
20180602_Monde_001	les réseaux sociaux	Social medias
20180602_Monde_001	Certains habitants *de Mayotte*	Population
20180602_Monde_001	la préfecture	Préfecture of Mayotte
20180602_Monde_001	propriétaires	Building owners in Mayotte
20180602_Monde_001	un expert *pour constater les dégâts*	Experts to ascertain the damage
20180602_Monde_001	maires	Mayors in Mayotte
20180602_Monde_001	les personnes*de Mayotte*	Population
20180602_Monde_001	le gouvernement	French State
20180602_Monde_001	Mme Gourault	Minister for Territorial Cohesion and Relations with Territorial Communities
20180602_Monde_001	Notre état major de zone et de protection civile de l'océan Indien	Zone and civil protection staff of the Indian Ocean
20180614_Monde_001	la préfecture de Mayotte	Préfecture of Mayotte
20180614_Monde_001	AFP	AFP
20180614_Monde_001	la population	Population
20180614_Monde_001	la préfecture de Mayotte	Préfecture of Mayotte
20180614_Monde_001	le Bureau de recherches géologiques et minières (BRGM)	BRGM
20180614_Monde_001	le Bureau de recherches géologiques et minières	BRGM
20180614_Monde_001	les populations*de Mayotte*	Population
20180614_Monde_001	la préfecture de Mayotte	Préfecture of Mayotte
20180614_Monde_001	Une mission du groupe d’intervention macrosismique	A mission from the GIM
20180614_Monde_001	La mission	A mission from the GIM
20180614_Monde_001	la commission interministérielle chargée de se prononcer sur le classement éventuel en catastrophe naturelle	CatNat cell
20180614_Monde_001	la préfecture	Préfecture of Mayotte
20180614_Monde_001	les particuliers	Population
20180614_Monde_001	dix familles	Population
20180614_Monde_001	plusieurs centaines d’habitants	Population
20180614_Monde_001	directeur de l’Union départementale des associations familiales (UDAF)	President of UDAF
20180614_Monde_001	la préfecture	Préfecture of Mayotte
20180614_Monde_001	l’agence régionale de santé (ARS)	ARS
20180614_Monde_001	une cellule psychologique	Psychological support cell
20180614_Monde_001	l’hôpital	CHM
20180614_Monde_001	Geneviève Dennetiere, médecin à l’ARS	Geneviève Dennetiere from ARS
20180614_Monde_001	une quinzaine de personnes	About 15 people in Mayotte
20180614_Monde_001	les secours	Rescue services
20180614_Monde_001	SAMU	SAMU
20180614_Monde_001	gens paniqués	Panicked people in Mayotte
20180614_Monde_001	La préfecture	Préfecture of Mayotte
20180614_Monde_001	Une équipe de professionnels de santé spécialisés*en soutien psychologique*	Team of health professionals specialized in psychological support
20180614_Monde_001	le vice-rectorat de Mayotte	Vice-rectorate of Mayotte
20180614_Monde_001	des experts*en inspection des dégâts*	Experts to ascertain the damage
20180614_Monde_001	les élèves	Schoolers in Mayotte
20190516_Monde_001	AFP	AFP
20190516_Monde_001	Une mission scientifique	A scientific mission
20190516_Monde_001	plusieurs ministères	Several ministries
20190516_Monde_001	une mission scientifique	A scientific mission
20190516_Monde_001	le bureau de recherches géologiques et minières (BRGM)	BRGM
20190516_Monde_001	le communiqué des ministères des outre-mer de la transition écologique de l’intérieur et de la recherche	The press release from the Ministries of Overseas Territories Ecological Transition Interior and Research
20190516_Monde_001	la physicienne Nathalie Feuillet de l’Institut de physique du globe de Paris (IPGB)	Nathalie Feuillet
20190516_Monde_001	une mission en mer	A scientific mission at sea
20190516_Monde_001	une vingtaine de scientifiques	Scientists involved in the campaigns
20190516_Monde_001	Nathalie Feuillet	Nathalie Feuillet
20190516_Monde_001	la physicienne	Nathalie Feuillet
20190516_Monde_001	la chercheuse	Nathalie Feuillet
20190516_Monde_001	*Nathalie Feuillet*	Nathalie Feuillet
20190516_Monde_001	une mission scientifique menée par le Comité national de la recherche scientifique (CNRS)	Scientists from CNRS
20190516_Monde_001	*une mission scientifique avec*BRGM	Scientists from BRGM
20190516_Monde_001	*une mission scientifique avec*IPGP	Scientists from IPGP
20190516_Monde_001	une campagne océanographique réalisée par le navire Marion-Dufresne	An oceanographic campaign carried out with the ship Marion-Dufresne
20190516_Monde_001	*Unidentified*	Unidentified
20190516_Monde_001	la population	Population
20190516_Monde_001	L’IPGP	IPGP
20190516_Monde_001	l’Institut français de recherche pour l’exploitation de la mer (Ifremer)	IFREMER
20190516_Monde_001	l’université de la Réunion	University of La Reunion
20190516_Monde_001	l’Institut de physique du globe de Strasbourg (IPGS)	IPGS
20190516_Monde_001	l’Institut national de l’information géographique et forestière (IGN)	IGN
20190516_Monde_001	l’Ecole normale supérieure (ENS)	ENS
20190516_Monde_001	le Centre national d’études spatiales (CNES)	CNES
20190516_Monde_001	le Service hydrographique et océanographique de la marine (SHOM)	SHOM
20190516_Monde_001	la mission	A scientific mission at sea
20190516_Monde_001	les ministères	Ministries
20190516_Monde_001	Les scientifiques*campaigns*	Scientists involved in the campaigns
20190516_Monde_001	Le préfet de Mayotte Dominique Sorain	Préfet of Mayotte
20190516_Monde_001	trois spécialistes de la sécurité civile	Experts in civil protection
20190516_Monde_001	*Préfet de Mayotte*	Préfet of Mayotte
20190516_Monde_001	gouvernement	French State
20190528_Monde_001	le département français de l'océan Indien	The French Department in the Indian Ocean
20190528_Monde_001	Les habitants de Mayotte	Population
20190528_Monde_001	le Bureau de recherches géologiques et minières (BRGM)	Scientists from BRGM
20190528_Monde_001	l'Institut de physique du globe de Paris (IPGP)	Scientists from IPGP
20190528_Monde_001	l'Institut français de recherche pour l'exploitation de la mer (Ifremer)	Scientists from IFREMER
20190528_Monde_001	d'autres organismes français de recherche	French scientific institutes
20190528_Monde_001	une campagne coordonnée par le CNRS	A campaign coordinated by the CNRS
20190528_Monde_001	navire Marion Dufresne	Marion Dufresne
20190528_Monde_001	la population	Population
20190528_Monde_001	*la population de* Mayotte	Population
20190528_Monde_001	le BRGM	BRGM
20190528_Monde_001	Nicolas Taillefer responsable de l'unité « Risque sismique et volcanique » au BRGM à Orléans	Nicolas Taillefer
20190528_Monde_001	le public	The public
20190528_Monde_001	les scientifiques	Scientific community
20190528_Monde_001	l'Institut géographique national (IGN)	IGN
20190528_Monde_001	le CNRS	CNRS
20190528_Monde_001	ministère de la recherche	Ministry of Higher Education Research and Innovation
20190528_Monde_001	ministère de la transition écologique et solidaire	Ministry of Ecological Transition and Solidarity
20190528_Monde_001	des scientifiques*campaigns*	Scientists involved in the campaigns
20190528_Monde_001	La campagne de neuf jours	The 9-days scientific campaign
20190528_Monde_001	ces opérations *en mer*	Those operations at sea
20190528_Monde_001	Marion-Dufresne	Marion Dufresne
20190528_Monde_001	les chercheurs*campaigns*	Scientists involved in the campaigns
20190528_Monde_001	La mission	A scientific mission at sea
20190528_Monde_001	le Marion Dufresne	Marion Dufresne
20190528_Monde_001	Les scientifiques*campaigns*	Scientists involved in the campaigns
20190528_Monde_001	l'équipe*MAYOBS*	Scientific teams in MAYOBS
20190528_Monde_001	Stephan Jorry	Stephan Jorry
20190528_Monde_001	les participants à la mission	The participants in the mission
20190528_Monde_001	Philippe Kowalski ingénieur de recherche CNRS à l'Observatoire volcanologique du piton de la Fournaise dépendant de l'Institut de physique du globe de Paris	Philippe Kowalski
20190529_Monde_001	Une campagne océanographique	A campaign at sea
20190529_Monde_001	Les habitants de Mayotte	Population
20190529_Monde_001	le Bureau de recherches géologiques et minières (BRGM)	Scientists from BRGM
20190529_Monde_001	l'Institut de physique du globe de Paris (IPGP)	Scientists from IPGP
20190529_Monde_001	l'Ifremer	Scientists from IFREMER
20190529_Monde_001	d'autres organismes français de recherche	French scientific institutes
20190529_Monde_001	une campagne coordonnée par le CNRS	A campaign coordinated by the CNRS
20190529_Monde_001	navire Marion-Dufresne	Marion Dufresne
20190529_Monde_001	*les habitants de* Mayotte	Population
20190529_Monde_001	Nicolas Taillefer	Nicolas Taillefer
20190529_Monde_001	*Unidentified*	Unidentified
20190529_Monde_001	les scientifiques	Scientific community
20190529_Monde_001	l'Institut géographique national	IGN
20190529_Monde_001	CNRS	CNRS
20190529_Monde_001	ministère de la recherche	Ministry of Higher Education Research and Innovation
20190529_Monde_001	ministère de la transition écologique et solidaire	Ministry of Ecological Transition and Solidarity
20190529_Monde_001	des scientifiques*campaigns*	Scientists involved in the campaigns
20190529_Monde_001	l'armée	French army
20190529_Monde_001	La campagne de neuf jours	The 9-days scientific campaign
20190529_Monde_001	le Marion-Dufresne	Marion Dufresne
20190529_Monde_001	Les scientifiques*campaigns*	Scientists involved in the campaigns
20190529_Monde_001	l'équipe *de la campagne en mer*	Scientific teams in MAYOBS
20190529_Monde_001	Stephan Jorry chercheur à l'Ifremer et coresponsable de la mission	Stephan Jorry
20190529_Monde_001	Marion Dufresne	Marion Dufresne
20190529_Monde_001	les participants à la mission	The participants in the mission
20190708_Monde_001	les scientifiques	Scientific community
20190708_Monde_001	Marc Chaussidon directeur de l’Institut de physique du globe de Paris (IPGP)	Marc Chaussidon
20190708_Monde_001	les scientifiques français	The French scientists
20190708_Monde_001	une équipe de l’Institut français de recherche pour l’exploitation de la mer (Ifremer)	Scientists from IFREMER
20190708_Monde_001	*une équipe de*l’IPGP	Scientists from IPGP
20190708_Monde_001	*une équipe du*Bureau de recherches géologiques et minières (BRGM)	Scientists from BRGM
20190708_Monde_001	*une équipe de*l’IPGP	Team from IPGP
20190708_Monde_001	la campagne Mayobs 2	MAYOBS 2
20190708_Monde_001	Marion-Dufresne	Marion Dufresne
20190708_Monde_001	IPGP	IPGP
20190708_Monde_001	CNRS	CNRS
20190708_Monde_001	BRGM	BRGM
20190708_Monde_001	IFREMER	IFREMER
20190708_Monde_001	Stephan Jorry chercheur à l’Ifremer et responsable de la mission	Stephan Jorry
20190708_Monde_001	des chercheurs*non défini*	Scientists_undefined
20190708_Monde_001	les chercheurs* non défini*	Scientists_undefined
20190708_Monde_001	programme Tellus Mayotte	TelluS Mayotte
20190708_Monde_001	le Centre national de la recherche scientifique (CNRS)	CNRS
20190708_Monde_001	la population	Population
20190708_Monde_001	l'IGN	IGN
20190708_Monde_001	*Unidentified*	Unidentified
20190708_Monde_001	les chercheurs*non défini*	Scientists_undefined
20190708_Monde_001	campagnes du Marion-Dufresne	Marion Dufresne campaigns
20190708_Monde_001	la campagne Mayobs 2 du «Marion-Dufresne»	MAYOBS 2
20190708_Monde_001	scientifiques*campaigns*	Scientists involved in the campaigns
20190708_Monde_001	Marc Chaussidon	Marc Chaussidon
20190708_Monde_001	la journaliste Anne Perzo du Journal de Mayotte	Anne Perzo journalist for the JDM
20190708_Monde_001	missions de la sécurité civile	Mission for civil protection
20190708_Monde_001	le directeur du cabinet du préfet du département Etienne Guillet	Chief of staff of the Préfecture
20190708_Monde_001	Sébastien Jaffrot du BRGM	Sébastien Jaffrot
20190708_Monde_001	plusieurs campagnes de mesures magnétotelluriques	Several magnetotelluric studies
20190708_Monde_001	les experts	Experts_undefined
20190708_Monde_001	une nouvelle campagne du Marion-Dufresne	A new campaign with the Marion Dufresne
20190708_Monde_001	une autre *campagne du Marion Dufresne*	An other campaign with the Marion Dufresne
20190708_Monde_001	*une équipe du*Bureau de recherches géologiques et minières (BRGM)	Team from BRGM
20190708_Monde_001	les scientifiques*non défini*	Scientists_undefined
20190708_Monde_001	pouvoirs publics	Public authorities
20190708_Monde_001	les équipes*campaigns*	Scientists involved in the campaigns
20190708_Monde_001	une structure pérenne de type « observatoire volcanologique »	A hypothetical observatory in Mayotte
20190708_Monde_001	l’IPGP	IPGP
20190708_Monde_001	Eric Humler directeur adjoint à l’Institut national des sciences de l’Univers du CNRS	Eric Humler
20190708_Monde_001	l’Etat	French State
20190708_Monde_001	une telle institution **observatoire volcanologique pérenne*	A hypothetical observatory in Mayotte
20190708_Monde_001	nos partenaires	IPGP's partners
20190708_Monde_001	les ministères concernés	French State
20190710_Monde_002	*Eric Humler*	Eric Humler
20190710_Monde_002	Eric Humler est directeur adjoint scientifique de l'Institut national des sciences de l'Univers du Centre national de la recherche scientifique (INSU-CNRS)	Eric Humler
20190710_Monde_002	Christiane Grappin	Christiane Grappin
20190710_Monde_002	« Quand la terre tremble » (CNRS Editions 264 p. 24 euros)	Quand la terre tremble CNRS Editions
20190710_Monde_002	*Eric Humler* responsable du programme Tellus Mayotte	Eric Humler
20190710_Monde_002	laboratoires de l'INSU-CNRS situés à Strasbourg Toulouse et Grenoble	Labs of INSU-CNRS in Strasbourg Toulouse and Grenoble
20190710_Monde_002	équipes de l'Institut de physique du globe de Paris (IPGP) et du Bureau de recherches géologiques et minières (BRGM)	Teams from IPGP and BRGM
20190710_Monde_002	une nouvelle campagne	A new scientific campaign
20190710_Monde_002	une autre *campagne*	An other scientific campaign
20190710_Monde_002	Ces missions	Those scientific missions
20190710_Monde_002	l'Institut français de recherche pour l'exploitation de la mer (Ifremer)	IFREMER
20190710_Monde_002	le BRGM	BRGM
20190710_Monde_002	l'IPGP	IPGP
20190710_Monde_002	les responsables scientifiques	Scientific leaders
20190710_Monde_002	les représentants des différents ministères	Representatives of the various ministries
20190710_Monde_002	la délégation interministérielle aux risques majeurs outre-mer	DIRMOM
20190710_Monde_002	un navire	A boat
20190710_Monde_002	un observatoire permanent	A hypothetical observatory in Mayotte
20190710_Monde_001	Marc Chaussidon directeur de l'Institut de physique du globe de Paris (IPGP)	Marc Chaussidon
20190710_Monde_001	les scientifiques français	The French scientists
20190710_Monde_001	une équipe de l'Institut français de recherche pour l'exploitation de la mer (Ifremer)	Scientists from IFREMER
20190710_Monde_001	*une équipe de*l'IPGP	Scientists from IPGP
20190710_Monde_001	*une équipe du*Bureau de recherches géologiques et minières (BRGM)	Scientists from BRGM
20190710_Monde_001	la campagne May obs 2	MAYOBS 2
20190710_Monde_001	Marion-Dufresne	Marion Dufresne
20190710_Monde_001	Stephan Jorry chercheur à l'Ifremer et responsable de la mission	Stephan Jorry
20190710_Monde_001	chercheurs*non défini*	Scientists_undefined
20190710_Monde_001	programme Tellus Mayotte coordonné par le Centre national de la recherche scientifique (CNRS)	TelluS Mayotte
20190710_Monde_001	la population	Population
20190710_Monde_001	l'IGN	IGN
20190710_Monde_001	Les scientifiques*campaigns*	Scientists involved in the campaigns
20190710_Monde_001	les équipes*campaigns*	Scientists involved in the campaigns
20190710_Monde_001	les chercheurs*campaigns*	Scientists involved in the campaigns
20190710_Monde_001	centre Ifremer de Brest	IFREMER in Brest
20190710_Monde_001	campagnes du Marion-Dufresne	Marion Dufresne campaigns
20190710_Monde_001	scientifiques*campaigns*	Scientists involved in the campaigns
20190710_Monde_001	Marc Chaussidon	Marc Chaussidon
20190710_Monde_001	pouvoirs publics	Public authorities
20190710_Monde_001	la journaliste Anne Perzo du Journal de Mayotte	Anne Perzo journalist for the JDM
20190710_Monde_001	missions de la sécurité civile	Mission for civil protection
20190710_Monde_001	le directeur du cabinet du préfet du département Etienne Guillet	Chief of staff of the Préfecture
20190710_Monde_001	Sébastien Jaffrot du BRGM	Sébastien Jaffrot
20190710_Monde_001	plusieurs campagnes de mesures magnétotelluriques	Several magnetotelluric studies
20190710_Monde_001	les experts	Experts_undefined
20190710_Monde_001	une nouvelle campagne du Marion Dufresne	A new campaign with the Marion Dufresne
20190710_Monde_001	une autre *campagne*	An other scientific campaign
20190710_Monde_001	un autre navire	An other ship
20190710_Monde_001	les équipes*campaigns*	Scientists involved in the campaigns
20190710_Monde_001	une structure pérenne de type « observatoire volcanologique »	A hypothetical observatory in Mayotte
20190710_Monde_001	l'IPGP	IPGP
20190710_Monde_001	Eric Humler directeur adjoint à l'Institut national des sciences de l'Univers du CNRS	Eric Humler
20190710_Monde_001	l'Etat	French State
20190710_Monde_001	une telle institution	A hypothetical observatory in Mayotte
20190710_Monde_001	nos partenaires	IPGP's partners
20190710_Monde_001	les ministères concernés	French State
20191025_Monde_001	*Unidentified*	Unidentified
20191025_Monde_001	les habitants des bidonvilles situés dans la mangrove d'Iloni	The inhabitants of the slums located in the mangrove of Iloni
20191025_Monde_001	Le plus jeune département de France	The youngest department in France
20191025_Monde_001	le président de la République Emmanuel Macron	President of the French Republic
20191025_Monde_001	chef de l'Etat	President of the French Republic
20191025_Monde_001	villageois d'Iloni vivant sur le littoral	Villagers of Iloni living on the coast
20191025_Monde_001	une habitante *d'Iloni*	An inhabitant in Iloni
20191025_Monde_001	le directeur de cabinet de la préfecture Etienne Guillet	Chief of staff of the Préfecture
20191025_Monde_001	Frédéric Tronel directeur du Bureau de recherches géologiques et minières (BRGM) de Mayotte	Frédéric Tronel
20191025_Monde_001	Saïd Hachim géographe et coauteur de l'Atlas des risques naturels et des vulnérabilités territoriales de Mayotte	Saïd Hachim
20191025_Monde_001	la géographe Virginie Duvat contributrice du rapport spécial du Groupe d'experts intergouvernemental sur l'évolution du climat (GIEC) consacré à l'océan	Virginie Duvat
20191025_Monde_001	la chercheuse *Virginie Duvat* qui a vécu dix ans dans l'océan Indien	Virginie Duvat
20191025_Monde_001	Le département	Department of Mayotte
20191025_Monde_001	la préfecture	Préfecture of Mayotte
20191025_Monde_001	les mairies	Municipalities
20191025_Monde_001	les populations	Population
20191025_Monde_001	Etienne Guillet	Chief of staff of the Préfecture
20191025_Monde_001	les communes	Communes
20191025_Monde_001	Laurent Floch directeur de Météo France Mayotte	Laurent Floch
20191025_Monde_001	les services *Météo France*	Météo France
20191025_Monde_001	l'Insee	INSEE
20191025_Monde_001	Mohamed Moindjie maire adjoint de Mamoudzou	Deputy mayor in charge of development in Mamoudzou
20191025_Monde_001	premier ministre Edouard Philippe	Prime Minister
20191025_Monde_001	80 % des villages de Mayotte	Villages in Mayotte
20191025_Monde_001	des vies humaines	Inhabitants at-risk
20191025_Monde_001	Virginie Duvat	Virginie Duvat
20191025_Monde_001	la population	Population
20191025_Monde_001	la géographe	Saïd Hachim
20191025_Monde_001	le directeur de cabinet de la préfecture	Chief of staff of the Préfecture
20191025_Monde_001	collectivités	Territorial authorities
20191025_Monde_001	*le département de* Mayotte	Department of Mayotte
20191025_Monde_001	le préfet de Mayotte	Préfet of Mayotte
20191025_Monde_001	département	Department of Mayotte
20200630_Monde_001	Une double campagne*MAYOBS 13*	A double scientific campaign
20200630_Monde_001	scientifiques*de MAYOBS 13*	Scientists in MAYOBS 13
20200630_Monde_001	les scientifiques	Scientific community
20200630_Monde_001	des chercheurs*de MAYOBS 13*	A scientific mission
20200630_Monde_001	cette campagne *MAYOBS 13*	This campaign in full containment
20200630_Monde_001	le navire des Terres australes et antarctiques françaises (TAAF)	Marion Dufresne
20200630_Monde_001	organisateurs *de MAYOBS 13*	Campaign organizers
20200630_Monde_001	organisateurs*de MAYOBS 13*	An other ship
20200630_Monde_001	l'ensemble de la flotte océanographique française	The entire French oceanographic fleet
20200630_Monde_001	le Champlain de la marine nationale	Le Champlain from the national navy
20200630_Monde_001	le Gauss de la société Fugro	Le Gauss from Fugro Compagnie
20200630_Monde_001	l'Etat	French State
20200630_Monde_001	la population	Population
20200630_Monde_001	Nathalie Feuillet, de l'Institut de physique du globe de Paris (IPGP)	Nathalie Feuillet
20200630_Monde_001	pouvoirs publics	Public authorities
20200630_Monde_001	le cabinet du premier ministre	Prime minister's office
20200630_Monde_001	l'IPGP	IPGP
20200630_Monde_001	le Réseau de surveillance volcanologique et sismologique de Mayotte (Revosima)	REVOSIMA
20200630_Monde_001	de multiples organismes de recherche*REVOSIMA*	Multiple research institutes
20200630_Monde_001	le Bureau de recherches géologiques et minières (BRGM)	BRGM
20200630_Monde_001	l'Institut français de recherche pour l'exploitation de la mer (Ifremer)	IFREMER
20200630_Monde_001	l'IPGP	IPGP
20200630_Monde_001	Emmanuel Rinnert, chercheur en géosciences marine à l'Ifremer	Emmanuel Rinnert
20200630_Monde_001	la première des deux campagnes baptisée « MAY OBS 13-1 »	The first campaign named MAYOBS 13-1
20200630_Monde_001	quatre scientifiques*de la métropole MAYOBS 13-1*	Scientists in MAYOBS 13
20200630_Monde_001	«MAYOBS 13-2 »	MAYOBS 13-2
20200630_Monde_001	trois chefs de mission*MAYOBS 13-2*	Scientific mission leaders
20200630_Monde_001	des membres de l'équipe technique*MAYOBS 13-2*	MAYOBS 13-2
20200630_Monde_001	l'équipage du Gauss	Crew on Le Gauss
20200630_Monde_001	François Houllier, le PDG de l'Ifremer	François Houllier
20200630_Monde_001	la flotte océanographique française	The French oceanographic fleet
20200630_Monde_001	Certaines campagnes comme celles que devait conduire l'Antea	Some campaigns such as those to be conducted by Antea
20200630_Monde_001	personnel*de navigation du Champlain MAYOBS 13*	Crew on Le Champlain
20200630_Monde_001	des scientifiques*de la flotte océanographique français*	Scientists involved in the campaigns
20180512_JDM_001	vous *les lecteurs du JDM*	Readers of Journal of Mayotte
20180512_JDM_001	la préfecture	Préfecture of Mayotte
20180512_JDM_001	les services de l'Etat	Préfecture of Mayotte
20180514_JDM_001	Institut d'études géologiques des États-Unis	USGS
20180514_JDM_001	*Unidentified*	Unidentified
20180514_JDM_001	gens	Population
20180514_JDM_001	la préfecture	Préfecture of Mayotte
20180514_JDM_001	le Bureau de recherche géologique et minière (BRGM)	BRGM
20180514_JDM_001	Eric Tronel, directeur du BRGM Mayotte	Frédéric Tronel
20180514_JDM_001	Le responsable du bureau local	Frédéric Tronel
20180514_JDM_001	Institut d’études géologiques des États-Unis	USGS
20180514_JDM_001	Mahorais	Population
20180514_JDM_001	le directeur du BRGM	Frédéric Tronel
20180514_JDM_001	Le BRGM	BRGM
20180515_JDM_002	Préfet de Mayotte	Préfet of Mayotte
20180515_JDM_002	la préfecture	Préfecture of Mayotte
20180515_JDM_002	la préfecture	Préfecture of Mayotte
20180515_JDM_002	le BRGM	BRGM
20180515_JDM_002	la population	Population
20180515_JDM_002	la population	Population
20180515_JDM_002	BRGM	BRGM
20180515_JDM_002	la préfecture	Préfecture of Mayotte
20180515_JDM_002	vos enfants	Children
20180515_JDM_002	les équipes pédagogiques	Teaching staff in Mayotte
20180515_JDM_002	les secours	Rescue services
20180515_JDM_002	autorités	Authorities
20180515_JDM_002	radio	Radio
20180515_JDM_002	télévision	TV
20180515_JDM_002	sites internets *du Gouvernement*	Website of the Government
20180515_JDM_002	sites internets *du ministère de l’intérieur*	Website of Ministry of the Interior
20180515_JDM_002	réseaux sociaux du ministère de l’intérieur	Social medias of Ministry of Interior
20180515_JDM_002	réseaux sociaux *du Gouvernement*	Social medias of Government
20180515_JDM_001	trois blessés	Injured people in Mayotte
20180515_JDM_001	USGS	USGS
20180515_JDM_001	USGS	USGS
20180515_JDM_001	le BRGM (Bureau de recherche géologique et minière)	BRGM
20180515_JDM_001	l’Institut Géologique des États-Unis (USGS)	USGS
20180515_JDM_001	la préfecture	Préfecture of Mayotte
20180515_JDM_001	trois blessés légers	Injured people in Mayotte
20180515_JDM_001	les services de secours	Rescue services
20180515_JDM_001	le site du USGS	USGS
20180515_JDM_001	la préfecture	Préfecture of Mayotte
20180515_JDM_001	vos enfants	Children
20180515_JDM_001	les équipes pédagogiques	Teaching staff in Mayotte
20180515_JDM_001	les secours	Rescue services
20180515_JDM_001	autorités	Authorities
20180515_JDM_001	radio	Radio
20180515_JDM_001	télévision	TV
20180515_JDM_001	sites internets *du Gouvernement*	Website of the Government
20180515_JDM_001	sites internets *du ministère de l’intérieur*	Website of Ministry of the Interior
20180515_JDM_001	réseaux sociaux du ministère de l’intérieur	Social medias of Ministry of Interior
20180515_JDM_001	réseaux sociaux *du Gouvernement*	Social medias of Government
20180515_JDM_001	les spécialistes *des séismes*	Seismologists
20180515_JDM_001	victimes *du 1er décembre 1993*	People historically injured in Mayotte
20180516_JDM_002	Phil Ouzov	Phil Ouzov
20180516_JDM_005	Phil Ouzov	Phil Ouzov
20180516_JDM_005	Le dessinateur Phil Ouzov	Phil Ouzov
20180516_JDM_005	Phil Ouzov	Phil Ouzov
20180516_JDM_001	la préfecture	Préfecture of Mayotte
20180516_JDM_001	Institut d’études géologiques des États-Unis	USGS
20180516_JDM_001	la préfecture	Préfecture of Mayotte
20180516_JDM_001	le Bureau des Recherches Géologiques et Minières (BRGM)	BRGM
20180516_JDM_003	la préfecture de Mayotte	Préfecture of Mayotte
20180516_JDM_003	le préfet de Mayotte	Préfet of Mayotte
20180516_JDM_003	les communes	Communes
20180516_JDM_003	les services de l’État	Préfecture of Mayotte
20180516_JDM_003	le Bureau des Recherches Géologiques et Minières (BRGM)	BRGM
20180516_JDM_003	la population	Population
20180516_JDM_003	Les particuliers	Population
20180516_JDM_003	leur mairie	Municipalities
20180516_JDM_003	Le préfet	Préfet of Mayotte
20180516_JDM_003	communes	Communes
20180516_JDM_003	La préfecture	Préfecture of Mayotte
20180516_JDM_003	population	Population
20180516_JDM_003	les services de secours	Rescue services
20180516_JDM_003	autorités	Authorities
20180516_JDM_003	radio	Radio
20180516_JDM_003	télévision	TV
20180516_JDM_003	sites internets *officiels*	Official websites
20180516_JDM_003	réseaux sociaux officiels	Official social medias
20180516_JDM_003	vos enfants	Children
20180516_JDM_003	les équipes pédagogiques	Teaching staff in Mayotte
20180516_JDM_004	La préfecture	Préfecture of Mayotte
20180516_JDM_004	Un centre opérationnel départemental	Crisis unit in the departmental council
20180516_JDM_004	Le préfet	Préfet of Mayotte
20180516_JDM_004	Dominique Sorain	Préfet of Mayotte
20180516_JDM_004	tous les services	Crisis management services
20180516_JDM_004	cet enseignant	Witnesses in Mayotte
20180516_JDM_004	ces voisins	Witnesses in Mayotte
20180516_JDM_004	cet habitant	Witnesses in Mayotte
20180516_JDM_004	trois personnes *admises aux urgences*	Injured people in Mayotte
20180516_JDM_004	le BRGM, bureau d’études géologiques	BRGM
20180516_JDM_004	le préfet Dominique Sorain	Préfet of Mayotte
20180516_JDM_004	le BRGM	BRGM
20180516_JDM_004	les scientifiques	Scientific community
20180516_JDM_004	Le préfet	Préfet of Mayotte
20180516_JDM_004	Dominique Sorain	Préfet of Mayotte
20180516_JDM_004	tous les services	Crisis management services
20180516_JDM_004	Le préfet	Préfet of Mayotte
20180516_JDM_004	cellule de crise ou COD	Crisis unit in the departmental council
20180516_JDM_004	des maires	Mayors in Mayotte
20180516_JDM_004	responsables des services de secours	Chiefs of rescue services in Mayotte
20180516_JDM_004	la population	Population
20180516_JDM_004	tous les services d’urgence	Rescue services
20180516_JDM_004	le COD	Crisis unit in the departmental council
20180516_JDM_004	La préfecture	Préfecture of Mayotte
20180516_JDM_004	Le préfet	Préfet of Mayotte
20180516_JDM_004	la population	Population
20180516_JDM_004	La préfecture	Préfecture of Mayotte
20180516_JDM_004	des experts	Experts_undefined
20180516_JDM_004	les pompiers	Firemen
20180516_JDM_004	la mairie	Municipalities
20180516_JDM_004	un expert de la préfecture	Experts to ascertain the damage
20180516_JDM_004	ce professeur	Witnesses in Mayotte
20180516_JDM_004	*Unidentified*	Unidentified
20180516_JDM_004	les personnes	Population
20180516_JDM_004	les habitants de pays à forte sismicité	Populations living in countries with high seismicity
20180516_JDM_004	services de secours	Rescue services
20180517_JDM_001	USGS	USGS
20180517_JDM_001	La préfecture	Préfecture of Mayotte
20180517_JDM_001	La préfecture	Préfecture of Mayotte
20180517_JDM_001	BRGM	BRGM
20180517_JDM_001	la population	Population
20180518_JDM_001	Phil Ouzov	Préfecture of Mayotte
20180518_JDM_001	La préfecture	Préfecture of Mayotte
20180518_JDM_001	le Bureau des Recherches Géologiques et Minières (BRGM)	BRGM
20180518_JDM_001	le BRGM	BRGM
20180518_JDM_002	la population	Population
20180518_JDM_002	le vice-rectorat	Vice-rectorate of Mayotte
20180518_JDM_002	La préfecture	Préfecture of Mayotte
20180518_JDM_002	une cellule de gestion de crise	Crisis unit_undefined
20180518_JDM_002	les établissements scolaires	Schools
20180518_JDM_002	enseignants	Teachers in Mayotte
20180518_JDM_002	le site pédagogique du Vice-rectorat	Website of Vice-rectorate of Mayotte
20180518_JDM_002	élèves	Schoolers in Mayotte
20180519_JDM_001	La préfecture	Préfecture of Mayotte
20180519_JDM_001	l’observation américain de sismologie	USGS
20180519_JDM_001	La préfecture	Préfecture of Mayotte
20180519_JDM_001	*Unidentified*	Unidentified
20180519_JDM_001	La population de Mayotte	Population
20180519_JDM_001	les services de l’État	State services
20180519_JDM_001	BUREAU DES RECHERCHES GÉOLOGIQUES ET MINIÈRES (BRGM)	BRGM
20180519_JDM_001	Le bureau des recherches géologiques et minières	BRGM
20180520_JDM_001	Préfet de Mayotte	Préfet of Mayotte
20180520_JDM_001	le Bureau des Recherches Géologiques et Minières(BRGM)	BRGM
20180520_JDM_001	Le bureau des recherches géologiques et minières	BRGM
20180520_JDM_001	les services de l’État	Préfecture of Mayotte
20180520_JDM_001	préfet de Mayotte	Préfet of Mayotte
20180521_JDM_001	la Croix Rouge	The Red Cross
20180521_JDM_001	la population	Population
20180521_JDM_001	la Croix Rouge	The Red Cross
20180521_JDM_001	des habitants	Population
20180521_JDM_001	les volontaires de la Croix-Rouge	The Red Cross’ volunteers
20180521_JDM_001	les habitants	Population
20180521_JDM_001	le sous-préfet Etienne Guillet	Chief of staff of the Préfecture
20180521_JDM_001	la population	Population
20180521_JDM_001	des bénévoles de la Croix Rouge	The Red Cross’ volunteers
20180521_JDM_001	des habitants	Population
20180521_JDM_001	vice-rectorat	Vice-rectorate of Mayotte
20180521_JDM_001	le grand-public	The public
20180521_JDM_001	une habitante de Bandrélé	Witnesses in Mayotte
20180521_JDM_001	des gens	Population
20180521_JDM_001	elle *une habitante de Bandrélé*	Witnesses in Mayotte
20180521_JDM_001	les habitants	Population
20180521_JDM_001	la Croix-Rouge	The Red Cross
20180521_JDM_001	La préfecture	Préfecture of Mayotte
20180521_JDM_001	la Croix Rouge	The Red Cross
20180521_JDM_001	la population	Population
20180521_JDM_001	la mairie	Municipalities
20180521_JDM_001	deux équipes *de la Croix Rouge*	Two teams of The Red Cross
20180521_JDM_001	les habitants	Population
20180521_JDM_001	le directeur de cabinet du préfet Etienne Guillet	Chief of staff of the Préfecture
20180521_JDM_001	des habitants	Population
20180521_JDM_001	le directeur de cabinet du préfet Etienne Guillet	Chief of staff of the Préfecture
20180521_JDM_001	des habitants soucieux	Worried inhabitants
20180521_JDM_001	le “dir’cab”	Chief of staff of the Préfecture
20180521_JDM_001	enseignants	Teachers in Mayotte
20180521_JDM_001	Etienne Guillet	Chief of staff of the Préfecture
20180521_JDM_001	les experts *du bâtiment*	Experts to ascertain the damage
20180521_JDM_001	le fonctionnaire *Etienne Guillet*	Chief of staff of the Préfecture
20180521_JDM_001	Malidi Mohamed *un habitant*	Witnesses in Mayotte
20180521_JDM_001	Murielle Lignon *une témoin*	Witnesses in Mayotte
20180521_JDM_001	la page Facebook du préfet de Mayotte	Facebook page of the préfet of Mayotte
20180523_JDM_001	le maire de Mamoudzou	Mayor of Mamoudzou
20180523_JDM_001	la population	Population
20180523_JDM_001	brgm	BRGM
20180523_JDM_001	Majani Mohamed	Mayor of Mamoudzou
20180523_JDM_001	ses administrés	Residents in Mamoudzou
20180523_JDM_001	le maire de Mamoudzou	Mayor of Mamoudzou
20180523_JDM_001	le BRGM	BRGM
20180523_JDM_001	la population	Population
20180523_JDM_001	il *le maire de Mamoudzou*	Mayor of Mamoudzou
20180523_JDM_001	les administrés	Residents in Mamoudzou
20180523_JDM_001	les services compétents en cas de fort séisme	Dedicated services in case of big earthquake
20180523_JDM_001	ses enfants	Children
20180523_JDM_001	les équipes pédagogiques	Teaching staff in Mayotte
20180523_JDM_001	les secours	Rescue services
20180523_JDM_001	autorités	Authorities
20180523_JDM_001	radio	Radio
20180523_JDM_001	télévision	TV
20180523_JDM_001	sites internet *du gouvernement*	Website of the Government
20180523_JDM_001	sites internet *du ministère de l’intérieur*	Website of Ministry of the Interior
20180523_JDM_001	réseaux sociaux du ministère de l’intérieur	Social medias of Ministry of Interior
20180523_JDM_001	réseaux sociaux *du gouvernement*	Social medias of Government
20180523_JDM_002	opérateurs *instituts en sismologie*	Institutes for seismic monitoring
20180523_JDM_002	le BRGM	BRGM
20180523_JDM_002	l’institut américain USGS	USGS
20180523_JDM_002	le BRGM	BRGM
20180523_JDM_002	ce dernier *le BRGM*	BRGM
20180523_JDM_002	réseau international *USGS*	USGS
20180523_JDM_002	Les amateurs d’appli	Apps enthusiasts
20180523_JDM_002	internautes	Internet users
20180523_JDM_002	La préfecture	Préfecture of Mayotte
20180523_JDM_002	le bureau des Recherches géologiques (BRGM)	BRGM
20180523_JDM_002	la population	Population
20180523_JDM_002	l’USGS, l’Institut d’études géologiques des Etats-Unis	USGS
20180523_JDM_002	site *du BRGM*	Website of BRGM
20180523_JDM_002	brgm	BRGM
20180523_JDM_002	BRGM	BRGM
20180523_JDM_002	les scientifiques de l’antenne mahoraise	BRGM in Mayotte
20180523_JDM_002	l’USGS	USGS
20180523_JDM_002	BRGM	BRGM
20180523_JDM_002	USGS	USGS
20180523_JDM_002	le BRGM	BRGM
20180523_JDM_002	l’antenne locale du BRGM	BRGM in Mayotte
20180523_JDM_002	brgm	BRGM
20180523_JDM_002	des habitants	Population
20180523_JDM_002	des Mahorais	Population
20180523_JDM_002	certains fonctionnaires	Certain officials
20180523_JDM_002	le BRGM	BRGM
20180523_JDM_002	BRGM	BRGM
20180523_JDM_002	Le bureau *BRGM*	BRGM
20180523_JDM_002	toute personne souhaitant témoigner	Witnesses in Mayotte
20180523_JDM_002	le site du BCSF (Bureau Central Sismologique Français)	BCSF
20180524_JDM_002	préfet de Mayotte	Préfet of Mayotte
20180524_JDM_001	la préfecture de Mayotte	Préfecture of Mayotte
20180524_JDM_001	le BRGM	BRGM
20180524_JDM_003	le BRGM	BRGM
20180524_JDM_003	le Bureau de recherches géologiques et minières (BRGM)	BRGM
20180524_JDM_003	l’institut américain USGS	USGS
20180524_JDM_003	Le BRGM	BRGM
20180524_JDM_003	le BRGM	BRGM
20180525_JDM_001	La préfecture	Préfecture of Mayotte
20180525_JDM_001	la préfecture de Mayotte	Préfecture of Mayotte
20180525_JDM_001	le BRGM	BRGM
20180525_JDM_001	Le bureau des recherches géologiques et minières	BRGM
20180525_JDM_001	les services de l’État	Préfecture of Mayotte
20180525_JDM_001	Le commerce SFR	The SFR trade
20180525_JDM_001	le magasin SFR	The SFR trade
20180525_JDM_001	Patrick Josset, directeur général adjoint de SFR Réunion	Deputy Managing Director of SFR Réunion
20180525_JDM_001	le personnel*SFR*	The SFR trade staff
20180525_JDM_001	la préfecture	Préfecture of Mayotte
20180525_JDM_001	Mayotte la Première	Mayotte la 1ère
20180525_JDM_001	les agents *du conseil départmental*	Agents of the departmental council
20180525_JDM_001	la Direction par interim	The interim management of the departemental council
20180525_JDM_001	l’ensemble du personnel*COD*	Staff of the departmental council
20180525_JDM_001	la préfecture	Préfecture of Mayotte
20180528_JDM_001	les élus communaux	Local elected municipal officials
20180528_JDM_001	la DGS de la commune *de Koungou*	Director General of Services in Koungou
20180528_JDM_001	les habitant *de Koungou*	Inhabitants in Koungou
20180528_JDM_001	La DGS de la mairie de Koungou, Ketty Gob Crantor	Director General of Services in Koungou
20180528_JDM_001	la DEAL	DEAL
20180528_JDM_001	la direction de l’Equipement	Directorate of Public Works
20180528_JDM_001	le Bureau de Recherches géologiques et minière	BRGM
20180528_JDM_001	Des élèves	Schoolers in Mayotte
20180528_JDM_001	elle *La DGS de la mairie de Koungou*	Director General of Services in Koungou
20180528_JDM_001	Les enfants	Children
20180528_JDM_001	les parents	Parents
20180528_JDM_001	Ketty Gob Crantor	Director General of Services in Koungou
20180528_JDM_001	la DEAL	DEAL
20180528_JDM_002	la préfecture	Préfecture of Mayotte
20180528_JDM_002	La préfecture	Préfecture of Mayotte
20180528_JDM_002	Le rectorat de Mayotte	Vice-rectorate of Mayotte
20180528_JDM_002	La préfecture	Préfecture of Mayotte
20180528_JDM_002	la préfecture	Préfecture of Mayotte
20180528_JDM_002	*Unidentified*	Unidentified
20180528_JDM_002	cinq personnes *des blessés*	Five injured people
20180528_JDM_002	les services de secours	Rescue services
20180528_JDM_002	Les parents d’élèves	Parents in Mayotte
20180528_JDM_002	directeur d’école	Chief of schools
20180528_JDM_002	chef d’établissement	Chief of schools
20180528_JDM_002	BRGM	BRGM
20180528_JDM_002	le vice-rectorat	Vice-rectorate of Mayotte
20180528_JDM_002	le vice-rectorat	Vice-rectorate of Mayotte
20180528_JDM_002	directeurs d’établissement	Chiefs of schools
20180528_JDM_002	le maire	Mayor_undefined
20180528_JDM_002	le vice-rectorat	Vice-rectorate of Mayotte
20180528_JDM_002	un bureau spécialisé *expertise bâtimentaire*	Expert cabinet to ascertain the damage
20180528_JDM_002	les enfants	Children
20180528_JDM_002	les personnels*des écoles*	National Education staff in Mayotte
20180528_JDM_002	parents d’élèves	Parents in Mayotte
20180528_JDM_002	maire	Mayor_undefined
20180528_JDM_002	Vice-rectorat	Vice-rectorate of Mayotte
20180528_JDM_002	personnels*des écoles*	National Education staff in Mayotte
20180528_JDM_002	les enfants	Children
20180528_JDM_002	les parents *d'élèves*	Parents in Mayotte
20180528_JDM_002	autorités	Authorities
20180528_JDM_002	la mairie	Municipalities
20180529_JDM_001	le BRGM	BRGM
20180529_JDM_001	le Bureau de recherches géologiques et minières (BRGM)	BRGM
20180529_JDM_001	le BRGM	BRGM
20180529_JDM_001	l’USGS, l’Institut américain	USGS
20180529_JDM_001	les réseaux internationaux *sismologiques*	International webs for seismic monitoring
20180529_JDM_001	l’USGS	USGS
20180529_JDM_001	l’USGS	USGS
20180530_JDM_003	BRGM	BRGM
20180530_JDM_003	le BRGM	BRGM
20180530_JDM_003	*Unidentified*	Unidentified
20180530_JDM_003	BRGM	BRGM
20180530_JDM_003	BRGM	BRGM
20180530_JDM_003	le BRGM	BRGM
20180530_JDM_003	toute personne souhaitant témoigner	Witnesses in Mayotte
20180530_JDM_003	le site du BCSF (Bureau Central Sismologique Français	BCSF
20180530_JDM_003	La préfecture de Mayotte	Préfecture of Mayotte
20180530_JDM_002	le Bureau des Recherches Géologiques et Minières (BRGM)	BRGM
20180530_JDM_002	les habitants	Population
20180530_JDM_002	la préfecture	Préfecture of Mayotte
20180530_JDM_002	le sous-préfet Etienne Guillet	Chief of staff of the Préfecture
20180530_JDM_002	une cellule psychologique	Psychological support cell
20180530_JDM_002	habitants	Population
20180530_JDM_002	mairies	Municipalities
20180530_JDM_002	les personnels de l’Éducation Nationale	National Education staff in Mayotte
20180530_JDM_002	les enfants présents dans les bâtiments scolaires	Children in Schools
20180530_JDM_002	les parents	Parents in Mayotte
20180530_JDM_002	leurs enfants	Children
20180530_JDM_002	autorités	Authorities
20180530_JDM_001	Une « mission d’expertise » * interministérielle*	Interdepartmental expertise mission in June 2018
20180530_JDM_001	la population mahoraise	Population
20180530_JDM_001	le sénateur Thani Mohamed Soilihi	Mayotte's deputy Thani Mohamed Soilihi
20180530_JDM_001	la ministre Jacqueline Gourault	Minister for Territorial Cohesion and Relations with Territorial Communities
20180530_JDM_001	spécialistes de la sécurité civile	Experts in civil protection
20180530_JDM_001	scientifiques spécialisés en sismologie	Seismologists_undefined
20180530_JDM_001	le Bureau de recherches géologiques et minières (BRGM)	BRGM
20180530_JDM_001	Certains habitants	Population
20180530_JDM_001	Thani Mohamed	Mayotte's deputy Thani Mohamed Soilihi
20180530_JDM_001	le BRGM	BRGM
20180530_JDM_001	la population	Population
20180530_JDM_001	CCGM	CCGM
20180530_JDM_001	UNESCO	UNESCO
20180530_JDM_001	le sénateur Thani Mohamed	Mayotte's deputy Thani Mohamed Soilihi
20180530_JDM_001	la ministre *Jacqueline Gourault*	Minister for Territorial Cohesion and Relations with Territorial Communities
20180530_JDM_001	ministre de l’Intérieur	Ministry of Interior
20180530_JDM_001	les familles touchées	Impacted families in Mayotte
20180530_JDM_001	l’État	French State
20180530_JDM_001	Le département	Department of Mayotte
20180530_JDM_001	les communes	Communes
20180530_JDM_001	la ministre *Jacqueline Gourault*	Minister for Territorial Cohesion and Relations with Territorial Communities
20180530_JDM_001	la préfecture	Préfecture of Mayotte
20180530_JDM_001	La préfecture	Préfecture of Mayotte
20180530_JDM_001	une cellule psychologique	Psychological support cell
20180530_JDM_001	Jacqueline Gourault	Minister for Territorial Cohesion and Relations with Territorial Communities
20180530_JDM_001	l’Etat Major de zone et de protection civile de l’océan Indien	The Zone and Civil Protection Staff of the Indian Ocean
20180530_JDM_001	une mission de reconnaissance *interministérielle*	Interdepartmental expertise mission in June 2018
20180531_JDM_002	le Bureau de recherches géologiques et minières	BRGM
20180531_JDM_002	le BRGM	BRGM
20180531_JDM_002	l’USGS	USGS
20180531_JDM_002	le BRGM	BRGM
20180531_JDM_002	les habitants	Population
20180531_JDM_002	la préfecture	Préfecture of Mayotte
20180531_JDM_002	habitants	Population
20180531_JDM_002	mairies	Municipalities
20180531_JDM_002	les personnels de l’Éducation Nationale	National Education staff in Mayotte
20180531_JDM_002	les enfants présents dans les bâtiments scolaires	Children in Schools
20180531_JDM_002	les parents	Parents in Mayotte
20180531_JDM_002	leurs enfants	Children
20180531_JDM_002	autorités	Authorities
20180531_JDM_001	la mission d’expertise * interministérielle*	Interdepartmental expertise mission in June 2018
20180531_JDM_001	Le président du Département	President of the departmental council
20180531_JDM_001	son vice-président Issa Issa Abdou	Vice-President of the departmental council Issa Abdou
20180531_JDM_001	premier ministre	Prime Minister
20180531_JDM_001	la ministre des Outre-mer	Minister of Overseas
20180531_JDM_001	une mission scientifique	A scientific mission
20180531_JDM_001	une cellule psychologique pour les habitants	Psychological support cell for inhabitants
20180531_JDM_001	certains *habitants*	Population
20180531_JDM_001	la préfecture de Mayotte	Préfecture of Mayotte
20180531_JDM_001	une mission *d'expertise interministérielle*	Interdepartmental expertise mission in June 2018
20180531_JDM_001	Etienne Guillet	Chief of staff of the Préfecture
20180531_JDM_001	elle *la mission d'expertise interministérielle*	Interdepartmental expertise mission in June 2018
20180531_JDM_001	la ministre Jacqueline Gourault	Minister for Territorial Cohesion and Relations with Territorial Communities
20180531_JDM_001	elle *la mission d'expertise interministérielle*	Interdepartmental expertise mission in June 2018
20180531_JDM_001	spécialistes de la sécurité civile	Experts in civil protection
20180531_JDM_001	scientifiques spécialisés en sismologie	Seismologists_undefined
20180531_JDM_001	La cellule psychologique	Psychological support cell
20180531_JDM_001	Etienne Guillet	Chief of staff of the Préfecture
20180531_JDM_001	un psychologue du CHM	A psychologist in CHM
20180531_JDM_001	les maires	Mayors in Mayotte
20180531_JDM_001	BRGM	BRGM
20180531_JDM_001	maires	Mayors in Mayotte
20180531_JDM_001	*Unidentified*	Unidentified
20180531_JDM_001	particuliers	Population
20180531_JDM_001	leur maire	Mayors in Mayotte
20180531_JDM_001	*Unidentified*	Unidentified
20180531_JDM_001	les personnes assurées	Insured persons
20180531_JDM_001	les services de l’État	State services
20180531_JDM_001	les maires	Mayors in Mayotte
20180531_JDM_001	une commission du ministère de l’Intérieur	A commission of the Ministry of the Interior
20180531_JDM_001	ministères de l’Ecologie	Ministry of Ecological Transition and Solidarity
20180531_JDM_001	*ministère* des Finances	Ministry of Finances
20180531_JDM_001	*ministère* de l’Intérieur	Ministry of Interior
20180531_JDM_001	*ministère* des Outre-mer	Ministry of Overseas
20180531_JDM_001	la préfecture	Préfecture of Mayotte
20180531_JDM_001	les élèves	Schoolers in Mayotte
20180531_JDM_001	Etienne Guillet	Chief of staff of the Préfecture
20180531_JDM_001	le maire	Mayor_undefined
20180531_JDM_001	un ingénieur-structure	Experts to ascertain the damage
20180531_JDM_001	Didier Cauret, le directeur de cabinet de la vice-recteur	Chief of staff of the Vice-Rectorat of Mayotte
20180531_JDM_001	Les chefs d’établissement	Heads of schools
20180531_JDM_001	un expert, de la Socotec	Expert cabinet to ascertain the damage
20180531_JDM_001	*un expert* du Bureau Veritas	Expert cabinet to ascertain the damage
20180531_JDM_001	un expert	Expert_undefined
20180531_JDM_001	ministère *de l'Enseignement*	Ministry of National Education
20180601_JDM_003	BRGM	BRGM
20180601_JDM_003	La préfecture	Préfecture of Mayotte
20180601_JDM_003	BRGM	BRGM
20180601_JDM_003	les habitants	Population
20180601_JDM_003	la préfecture	Préfecture of Mayotte
20180601_JDM_003	habitants	Population
20180601_JDM_003	mairies	Municipalities
20180601_JDM_001	le BRGM	BRGM
20180601_JDM_001	La préfecture de Mayotte	Préfecture of Mayotte
20180601_JDM_002	L’UDAF	UDAF
20180601_JDM_002	familles	Population
20180601_JDM_002	l'Union Départementale des Associations Familiales (UDAF)	UDAF
20180601_JDM_002	familles du département	Population
20180601_JDM_002	Ali Nizary, président de l’UDAF Mayotte	President of UDAF
20180601_JDM_002	la population	Population
20180601_JDM_002	il *Ali Nizary*	President of UDAF
20180601_JDM_002	des personnes qui ne dorment plus ou peu	Persons with sleeping problems
20180601_JDM_002	*des personnes* celles qui ne se nourrissent pas ou le font très mal	Persons with eating problems
20180601_JDM_002	des personnes qui ont peur de quitter leur village	Persons afraid of leaving their village
20180601_JDM_002	les familles	Population
20180601_JDM_002	lui *Ali Nizary*	President of UDAF
20180601_JDM_002	certains médecins	Some physicians
20180601_JDM_002	l’UDAF	UDAF
20180601_JDM_002	une cellule psychologique	Psychological support cell
20180601_JDM_002	*Unidentified*	Unidentified
20180601_JDM_002	Les personnes qui suivent des traitements lourds ou qui ont des pathologies à risque	Persons with heavy treatments or at risks
20180601_JDM_002	*Unidentified*	Unidentified
20180601_JDM_002	les cabinet *de soin*	Health cabinets
20180601_JDM_002	les services de soin	Health services
20180601_JDM_002	la population	Population
20180601_JDM_002	familles du département	Population
20180601_JDM_002	les enfants	Children
20180601_JDM_002	les personnes en situation de handicap	Disabled persons in Mayotte
20180601_JDM_002	les personnes âgées	Older people in Mayotte
20180601_JDM_002	les femmes enceintes	Pregnant women in Mayotte
20180601_JDM_002	*Unidentified*	Unidentified
20180601_JDM_002	nos enfants	Children
20180601_JDM_002	des élèves	Schoolers in Mayotte
20180601_JDM_002	udaf Mayotte	UDAF
20180601_JDM_002	L’UDAF	UDAF
20180601_JDM_002	pouvoirs publics	Public authorities
20180601_JDM_002	Conseil Départemental	Departmental council
20180601_JDM_002	familles	Population
20180601_JDM_002	Elle *l'UDAF*	UDAF
20180601_JDM_002	sénateur Thani Mohamed Soilihi	Mayotte's deputy Thani Mohamed Soilihi
20180601_JDM_002	gouvernement	French State
20180601_JDM_002	l’institution *l'UDAF*	UDAF
20180601_JDM_002	l’UNAF(l’Union Nationale des Associations Familiales)	UNAF
20180601_JDM_002	les familles du département	Population
20180601_JDM_002	son président *de l'UDAF Mayotte*	President of UDAF
20180601_JDM_002	la population	Population
20180601_JDM_002	les personnes qui sont déjà touchées	Persons already impacted
20180601_JDM_002	l’Union Départementale des Associations Familiales	UDAF
20180601_JDM_002	les familles	Population
20180601_JDM_002	les services de l’État	State services
20180601_JDM_002	le Conseil Départemental	Departmental council
20180601_JDM_002	l’association des maires	Mayors association
20180601_JDM_002	la CSSM	CSSM
20180601_JDM_002	le vice-rectorat	Vice-rectorate of Mayotte
20180601_JDM_002	les structures intervenantes à domicile	Health structures intervening at home
20180601_JDM_002	toutes les associations adhérentes à l’UDAF et qui s’occupent des familles	All associations members of the UDAF and dealing with families
20180601_JDM_002	Grand Cadi de Mayotte	Grand Cadi de Mayotte
20180601_JDM_002	Association des infirmiers de Mayotte	Association of Nurses of Mayotte
20180601_JDM_002	Ordre des médecins	College of Physicians
20180601_JDM_002	Service Kiné à domicile	Home Physiotherapy Service
20180601_JDM_002	DEAL	DEAL
20180601_JDM_002	BRGM	BRGM
20180601_JDM_002	Croix Rouge :SIAO et préventions	The Red Cross
20180601_JDM_002	la directrice *de l'UDAF de Mayotte*	President of UDAF
20180602_JDM_001	la mission d’experts * interministérielle*	Interdepartmental expertise mission in June 2018
20180602_JDM_001	la préfecture	Préfecture of Mayotte
20180602_JDM_001	la mission d’expertise * interministérielle*	Interdepartmental expertise mission in June 2018
20180602_JDM_001	Le préfet Dominique Sorain	Préfet of Mayotte
20180602_JDM_001	les militaires	Military
20180602_JDM_001	la mission *d'expertise interministérielle*	Interdepartmental expertise mission in June 2018
20180602_JDM_001	Mendy Bengoubou, sismologue à la Direction générale Risque et Prévention	Mendy Bengoubou
20180602_JDM_001	le lieutenant-colonel Olivier Galichet, DGSCGS	Lt-colonel Galichet
20180602_JDM_001	Bastien Colas, Ingénieur du Bureau de Recherches Géologiques et Minière (BRGM)	Bastien Colas
20180602_JDM_001	des journalistes présents	Attending journalists
20180602_JDM_001	Bastien Colas	Bastien Colas
20180602_JDM_001	le BRGM	BRGM
20180602_JDM_001	Le préfet Dominique Sorain	Préfet of Mayotte
20180602_JDM_001	Mendy Bengoubou	Mendy Bengoubou
20180602_JDM_001	la population	Population
20180602_JDM_001	les scientifiques	Scientific community
20180603_JDM_001	La Préfecture	Préfecture of Mayotte
20180603_JDM_001	les centres de mesures internationaux	International centers for seismic monitoring
20180603_JDM_001	Le Préfet	Préfet of Mayotte
20180603_JDM_001	la population	Population
20180603_JDM_001	la préfecture	Préfecture of Mayotte
20180604_JDM_002	Les experts en sismique	Seismologists mission in June 2018
20180604_JDM_002	la préfecture	Préfecture of Mayotte
20180604_JDM_002	USGS	USGS
20180604_JDM_002	*Unidentified*	Unidentified
20180604_JDM_002	le BRGM	BRGM
20180604_JDM_002	le BRGM	BRGM
20180604_JDM_002	l'USGS	USGS
20180604_JDM_002	Le Préfet	Préfet of Mayotte
20180604_JDM_002	la population	Population
20180604_JDM_002	la préfecture	Préfecture of Mayotte
20180604_JDM_002	le site brgm.fr	Website of BRGM
20180604_JDM_001	agents du conseil départemental	Agents of the departmental council
20180604_JDM_001	la mission d’expertise * interministérielle*	Interdepartmental expertise mission in June 2018
20180604_JDM_001	le géographe du conseil départemental Saïd Hachim	Saïd Hachim
20180604_JDM_001	le président du conseil départemental	President of the departmental council
20180604_JDM_001	les experts « es-risques sismiques »	Seismologists mission in June 2018
20180604_JDM_001	agents *du conseil départemental*	Agents of the departmental council
20180604_JDM_001	simples citoyens	Population
20180604_JDM_001	journalistes	Journalists
20180604_JDM_001	Mendy Bengoubou, sismologue à la Direction générale Risque et Prévention	Mendy Bengoubou
20180604_JDM_001	le lieutenant-colonel Olivier Galichet, à la même DGSCGS	Lt-colonel Galichet
20180604_JDM_001	Bastien Colas, Ingénieur du Bureau de Recherches Géologiques et Minière (BRGM)	Bastien Colas
20180604_JDM_001	les experts *de la mission d'expertise interministérielle*	Interdepartmental expertise mission in June 2018
20180604_JDM_001	la mission d’expertise * interministérielle*	Interdepartmental expertise mission in June 2018
20180604_JDM_001	une salariée	Witnesses in Mayotte
20180604_JDM_001	sa mère	Witnesses in Mayotte
20180604_JDM_001	Mendy Bengoubou	Mendy Bengoubou
20180604_JDM_001	toute personne confrontée à un tremblement de terre	Everybody experimenting an earthquake
20180604_JDM_001	Bastien Colas	Bastien Colas
20180604_JDM_001	chacun d'entre nous *habitants de Mayotte*	Population
20180604_JDM_001	mairie	Municipalities
20180604_JDM_001	La mission *d'expertise interministérielle*	Interdepartmental expertise mission in June 2018
20180604_JDM_001	Olivier Galichet	Lt-colonel Galichet
20180604_JDM_001	Etienne Guillet, le directeur de cabinet de la préfecture de Mayotte	Chief of staff of the Préfecture
20180604_JDM_001	certains *habitants*	Population
20180604_JDM_001	autorités	Authorities
20180604_JDM_001	un groupe de travail avec les ingénieurs structure	A working group with structural engineers
20180604_JDM_001	certains agents *du conseil départemental*	Some agents of the departmental council
20180604_JDM_001	la préfecture	Préfecture of Mayotte
20180604_JDM_001	l'un *des agents du conseil départemental*	One of the agents of the departmental council
20180604_JDM_001	les salariés	Employees
20180604_JDM_001	Etienne Guillet	Chief of staff of the Préfecture
20180604_JDM_001	Saïd Hachim	Saïd Hachim
20180604_JDM_001	les enfants	Children
20180604_JDM_001	une cellule psychologique	Psychological support cell
20180604_JDM_001	un groupe de travail avec les sismologues de l’Hexagone et internationaux	a working group with international and mainland seismologists
20180605_JDM_004	la CGT Educ'action	Union CGT Educ’action
20180605_JDM_004	élèves	Schoolers in Mayotte
20180605_JDM_004	personnels *de l'Education Nationale*	National Education staff in Mayotte
20180605_JDM_004	la CGT Educ'action	Union CGT Educ’action
20180605_JDM_004	élèves	Schoolers in Mayotte
20180605_JDM_004	personnels *de l'Education Nationale*	National Education staff in Mayotte
20180605_JDM_004	Le syndicat	Union CGT Educ’action
20180605_JDM_004	le vice-rectorat	Vice-rectorate of Mayotte
20180605_JDM_004	représentants des parents d’élèves	Parent representatives
20180605_JDM_004	*représentants* des personnels	School staffs representatives
20180605_JDM_004	CGT Éduc’action Mayotte	Union CGT Educ’action
20180605_JDM_004	élèves	Schoolers in Mayotte
20180605_JDM_004	personnels *de l'Education Nationale*	National Education staff in Mayotte
20180605_JDM_004	le syndicat *CGT Educ'Action*	Union CGT Educ’action
20180605_JDM_004	les personnels *de l'Education Nationale*	Union CGT Educ’action
20180605_JDM_006	le BRGM	BRGM
20180605_JDM_006	BRGM	BRGM
20180605_JDM_006	le Bureau des Recherches Géologiques et Minières (BRGM)	BRGM
20180605_JDM_006	La préfecture	Préfecture of Mayotte
20180605_JDM_006	Le préfet de Mayotte	Préfet of Mayotte
20180605_JDM_006	centres de mesures internationaux	International centers for seismic monitoring
20180605_JDM_006	la préfecture	Préfecture of Mayotte
20180605_JDM_006	BRGM	BRGM
20180605_JDM_006	les services de secours	Rescue services
20180605_JDM_006	un blessé léger	An injured person
20180605_JDM_006	les sites *de la préfecture de Mayotte*	Website of Préfecture of Mayotte
20180605_JDM_006	les sites *du BRGM*	Website of BRGM
20180605_JDM_003	le BRGM	BRGM
20180605_JDM_003	BRGM	BRGM
20180605_JDM_003	USGS	USGS
20180605_JDM_003	le site du BRGM	Website of BRGM
20180605_JDM_003	la mission d’expertise *interministérielle*	Interdepartmental expertise mission in June 2018
20180605_JDM_005	les mairies	Municipalities
20180605_JDM_005	les mairies de l’île	Municipalities
20180605_JDM_005	La préfecture	Préfecture of Mayotte
20180605_JDM_005	le lieutenant colonel des pompiers Olivier Galichet	Lt-colonel Galichet
20180605_JDM_005	JDM	Journal of Mayotte
20180605_JDM_005	Les habitants	Population
20180605_JDM_005	celle *la mairie* d'Acoua	Municipalities of Acoua
20180605_JDM_005	ses administrés	Residents in Acoua
20180605_JDM_005	ses services techniques	Technical services in the commune of Acoua
20180605_JDM_005	Les services techniques de la mairie	Technical services in the commune of Acoua
20180605_JDM_005	la mairie	Commune of Acoua
20180605_JDM_005	les services de l’Etat	Préfecture of Mayotte
20180605_JDM_005	Le lieutenant colonel Galichet, de la mission d’experts * interministérielle*	Lt-colonel Galichet
20180605_JDM_005	Toillal Abdourraquib, le DGS de l’Association des Maires de Mayotte (AMM)	Mayors association
20180605_JDM_005	les maires	Mayors in Mayotte
20180605_JDM_005	les communes de Mamoudzou	Commune of Mamoudzou
20180605_JDM_005	*commune de* Mtsamboro	Commune of Mtsamboro
20180605_JDM_005	*commune de* Dembéni	Commune of Dembéni
20180605_JDM_005	le Centre Communal d’Action Sociale (CCAS) *de Koungou*	CCAS in Koungou
20180605_JDM_005	Annick Girardin	Minister of Overseas
20180605_JDM_005	les maires	Mayors in Mayotte
20180605_JDM_005	la mission d’experts * interministérielle*	Interdepartmental expertise mission in June 2018
20180605_JDM_005	les propriétaires assurés	Insured owners
20180605_JDM_005	*Unidentified*	Unidentified
20180605_JDM_005	services de la mairie	Municipality services
20180605_JDM_005	la Direction de l’Equipement (DEAL)	DEAL
20180605_JDM_002	les hyper sensibles *population de Mayotte*	Hyper sensitive peoples in Mayotte
20180605_JDM_002	Certains *population de Mayotte*	Population
20180605_JDM_002	le site USGS	Website of USGS
20180605_JDM_002	la BRGM	BRGM
20180605_JDM_002	la préfecture	Préfecture of Mayotte
20180605_JDM_002	préfet de Mayotte	Préfet of Mayotte
20180605_JDM_001	le vice-rectorat	Vice-rectorate of Mayotte
20180605_JDM_001	les élèves	Schoolers in Mayotte
20180605_JDM_001	les enseignants	Teachers in Mayotte
20180605_JDM_001	la CGT Educ’Action	Union CGT Educ’action
20180605_JDM_001	Didier Cauret, directeur de cabinet du vice-rectorat	Chief of staff of the Vice-Rectorat of Mayotte
20180605_JDM_001	les maires	Mayors in Mayotte
20180605_JDM_001	Les experts *en structure bâtimentaire*	Experts to ascertain the damage
20180605_JDM_001	les élèves	Schoolers in Mayotte
20180605_JDM_001	Les élèves	Schoolers in Mayotte
20180605_JDM_001	Les experts *en structure bâtimentaire*	Experts to ascertain the damage
20180605_JDM_001	Le cabinet *d'expertise en bâtiments*	Expert cabinet to ascertain the damage
20180605_JDM_001	le vice-rectorat	Vice-rectorate of Mayotte
20180605_JDM_001	le cabinet d’experts *en bâtiments*	Expert cabinet to ascertain the damage
20180605_JDM_001	une entreprise *d'expertise en bâtiment*	Experts enterprise to ascertain the damage
20180605_JDM_001	Didier Cauret	Chief of staff of the Vice-Rectorat of Mayotte
20180605_JDM_001	le vice-rectorat	Vice-rectorate of Mayotte
20180605_JDM_001	l’expert *en structure bâtimentaire*	Experts to ascertain the damage
20180605_JDM_001	experts *en structure bâtimentaire*	Experts to ascertain the damage
20180605_JDM_001	le vice-rectorat	Vice-rectorate of Mayotte
20180605_JDM_001	les personnels de santé	Health staff in Mayotte
20180605_JDM_001	les élèves	Schoolers in Mayotte
20180605_JDM_001	membres du personnel en difficulté psychologique *de l'Education Nationale*	Staff educational members in psychological difficulty
20180605_JDM_001	la délégation scientifique*damage*	Experts to ascertain the damage
20180606_JDM_004	Facebook	Facebook
20180606_JDM_004	la préfecture	Préfecture of Mayotte
20180606_JDM_004	le site américain USGS	USGS
20180606_JDM_004	le BRGM	BRGM
20180606_JDM_004	le Bureau des Recherches Géologiques et Minières (BRGM)	BRGM
20180606_JDM_002	le BRGM	BRGM
20180606_JDM_002	brgm	BRGM
20180606_JDM_002	le Bureau des Recherches Géologiques et Minières (BRGM)	BRGM
20180606_JDM_002	l’USGS	USGS
20180606_JDM_002	les réseaux internationaux	International webs for seismic monitoring
20180606_JDM_002	le BRGM	BRGM
20180606_JDM_002	les services de l’État	State services
20180606_JDM_002	les sites *de la préfecture de Mayotte*	Website of Préfecture of Mayotte
20180606_JDM_002	les sites *du BRGM*	Website of BRGM
20180606_JDM_001	La commune de Chirongui	Commune of Chirongui
20180606_JDM_001	population *de Chirongui*	Populations of Chirongui
20180606_JDM_001	la ville de Chirongui	Commune of Chirongui
20180606_JDM_001	ses administrés *de Chirongui*	Residents of Chirongui
20180606_JDM_001	membres de la mission d’expertise *interministérielle*	Interdepartmental expertise mission in June 2018
20180606_JDM_001	La maire de Chirongui	Mayor of Chirongui
20180606_JDM_001	la population dans les mosquées	The population in mosques
20180606_JDM_001	les écoles	Schools
20180606_JDM_001	*la population* dans les espaces publics	Population
20180606_JDM_001	Facebook	Facebook
20180606_JDM_001	sa page *Hanima Ibrahima maire de Chirongui*	Facebook page of the mayor of Chirongui
20180606_JDM_001	Les agents du CCAS	Agents of the CCAS
20180606_JDM_001	la Croix rouge	The Red Cross
20180606_JDM_001	des villageois	Villagers in Mayotte
20180606_JDM_001	des personnes les plus isolées	Most isolated people in Mayotte
20180606_JDM_001	la préfecture	Préfecture of Mayotte
20180606_JDM_001	Hanima Ibrahima *maire de Chirongui*	Mayor of Chirongui
20180606_JDM_001	La mairie *de Chirongui*	Commune of Chirongui
20180606_JDM_001	Le Préfet	Préfet of Mayotte
20180606_JDM_001	la population	Population
20180606_JDM_001	les propriétaires	Building owners in Mayotte
20180606_JDM_001	un expert *des bâtiments*	Experts to ascertain the damage
20180606_JDM_001	les collectivités locales	Local territorial collectivities
20180606_JDM_001	la préfecture	Préfecture of Mayotte
20180606_JDM_001	une cellule psychologique	Psychological support cell
20180606_JDM_001	CHM	CHM
20180606_JDM_001	experts en sismologie	Seismologists mission in June 2018
20180606_JDM_001	*experts* en gestion de crise à Mayotte	Experts in crisis management in Mayotte
20180606_JDM_001	La mairie *de Chirongui*	Municipality of Chirongui
20180606_JDM_001	la préfecture	Préfecture of Mayotte
20180606_JDM_001	les habitants du sud *de Grande Terre*	Inhabitants in South of Mayotte
20180606_JDM_001	experts *de la mission d'expertise interministérielle*	Interdepartmental expertise mission in June 2018
20180606_JDM_001	les trois experts *de la mission d'expertise interministérielle*	Interdepartmental expertise mission in June 2018
20180606_JDM_001	Bastien Colas, ingénieur au BRGM	Bastien Colas
20180606_JDM_001	Mendy Bengoubou, sismologue au Ministère de l’Ecologie	Mendy Bengoubou
20180606_JDM_001	Olivier Galichet, Lieutenant Colonel au Ministère de l’Intérieur	Lt-colonel Galichet
20180606_JDM_001	Directeur de Cabinet de la Préfecture	Chief of staff of the Préfecture
20180606_JDM_001	Mme le Maire *de Chirongui*	Mayor of Chirongui
20180606_JDM_001	agents de la Ville *de Chirongui*	Agents of the city of Chirongui
20180606_JDM_001	CCAS de Chirongui	CCAS in Chirongui
20180606_JDM_001	les experts *de la mission d'expertise interministérielle*	Interdepartmental expertise mission in June 2018
20180606_JDM_001	deux familles de Tsimkoura	Two families in Tsimkoura
20180606_JDM_001	la ville de Chirongui	City of Chirongui
20180606_JDM_001	sa population	Population
20180606_JDM_001	des experts *de la mission d'expertise interministérielle*	Interdepartmental expertise mission in June 2018
20180606_JDM_001	les habitants	Population
20180606_JDM_003	La préfecture de Mayotte	Préfecture of Mayotte
20180606_JDM_003	Bureau de Recherches Géologiques et Minières (BRGM)	BRGM
20180606_JDM_003	les habitants	Population
20180606_JDM_003	Le Marion Dufresne	Marion Dufresne
20180606_JDM_003	*Unidentified*	Unidentified
20180606_JDM_003	une mission de recherche scientifique	A scientific research mission
20180606_JDM_003	les experts *de la mission d'expertise interministérielle*	Interdepartmental expertise mission in June 2018
20180606_JDM_003	Conseil Départemental	Departmental council
20180606_JDM_003	une mission *scientifique* à venir	An upcoming *scientific* mission
20180606_JDM_003	plusieurs internautes	Several Internet users
20180606_JDM_003	le site américain USGS	Website of USGS
20180606_JDM_003	*Unidentified*	Unidentified
20180606_JDM_003	Les sites internet officiels d’instituts de sismologie internationaux	Website of international scientific institutes
20180606_JDM_003	BRGM	BRGM
20180606_JDM_003	l’équipe actuelle du BRGM Mayotte	BRGM in Mayotte
20180607_JDM_003	les non assurés *habitants de Mayotte*	Non insured people in Mayotte
20180607_JDM_003	Elle *mairie de Mamoudzou*	Municipality in Mamoudzou
20180607_JDM_003	la population	Population
20180607_JDM_003	Centre Communal d’Action Sociale (CCAS)	CCAS in Mamoudzou
20180607_JDM_001	le BRGM	BRGM
20180607_JDM_001	Le BRGM	BRGM
20180607_JDM_002	Le BRGM	BRGM
20180608_JDM_001	BRGM	BRGM
20180608_JDM_001	le Bureau des Recherches Géologiques et Minières (BRGM)	BRGM
20180608_JDM_001	Le BRGM	BRGM
20180608_JDM_001	les services de l’État	Préfecture of Mayotte
20180608_JDM_001	les sites *de la préfecture de Mayotte*	Website of Préfecture of Mayotte
20180608_JDM_001	les sites *du BRGM*	Website of BRGM
20180608_JDM_002	préfet de Mayotte	Préfet of Mayotte
20180608_JDM_002	le Bureau des Recherches Géologiques et Minières (BRGM)	BRGM
20180608_JDM_002	*Unidentified*	Unidentified
20180608_JDM_002	les services de secours	Rescue services
20180608_JDM_002	les sites *de la préfecture de Mayotte*	Website of Préfecture of Mayotte
20180608_JDM_002	les sites *du BRGM*	Website of BRGM
20180608_JDM_003	Une mission d’étude macrosismique	A mission from the GIM
20180608_JDM_003	la mission gouvernementale *mission d'expertise*	Interdepartmental expertise mission in June 2018
20180608_JDM_003	préfet	Préfet of Mayotte
20180608_JDM_003	le Bureau Central Sismologique Français (BCSF)	BCSF
20180608_JDM_003	le Réseau National de Surveillance Sismique (RENASS)	RENASS
20180608_JDM_003	une mission du Groupe d’Intervention Macrosismique (GIM)	A mission from the GIM
20180608_JDM_003	La mission *GIM*	A mission from the GIM
20180608_JDM_003	Le BCSF-RENASS	BCSF-RENASS
20180608_JDM_003	la préfecture	Préfecture of Mayotte
20180608_JDM_003	Christophe Sira : Chargé d’études macrosismiques	Christophe Sira
20180608_JDM_003	Antoine Schlupp : Responsable scientifique	Antoine Schlupp
20180608_JDM_003	Martial Bontemps : Membre du GIM	Martial Bontemps
20180608_JDM_003	Edouard Régis : Membre du GIM	Edouard Régis
20180608_JDM_003	le BRGM	BRGM
20180608_JDM_003	le communiqué BRGM	A report from BRGM
20180609_JDM_001	Jean-Michel Blanquer	Minister of National Education
20180609_JDM_001	personnels de l'Education nationale	National Education staff in Mayotte
20180609_JDM_001	Jean-Michel Blanquer, ministre de l’Education Nationale	Minister of National Education
20180609_JDM_001	l’ensemble des professionnels de l’Education nationale	National Education staff in Mayotte
20180609_JDM_001	ces personnels *de l'Education Nationale*	National Education staff in Mayotte
20180609_JDM_001	Certains *personnels de l'Education Nationale*	Some of the National Education staff in Mayotte
[truncated: 2,628 more rows]
