# Supplementary material for: Quantitative analysis of actors' mention in press coverage of a seismo-volcanic activity in the French overseas
Source: Copernicus journal article supplement (doi:10.5194/egusphere-2024-1358), 2024-06-14
Supplement: Supplementary file 1 [file egusphere-2024-1358-supplement.zip › Supplementary Information/TABLE_SB_GeneralNamesToCategories_Final.csv]

GeneralNames	GeneralNames2	Category_of_actors	Geo_lvel
«Bathymétrie» by Jean-Christophe Audru	Jean-Christophe Audru	Scientific research and monitoring (named individuals)	Local/National
160 schoolers from 1rst and 2nd degres	Schoolers in Mayotte	Students and schoolers in Mayotte	Local
19 injured people	Populations in Mayotte	At-risk populations in Mayotte	Local
1srt IPGP campaign	IPGP	Scientific research and monitoring (groups, publications and institutions)	National
1st Deputy Mayor of Pamandzi	Deputy Mayor of Pamandzi	Elected local officials	Local
1st vice-president of the Departmental Council	Vice-president of the Departmental Council	Elected local officials	Local
2 next missions at sea	Scientific campaigns	Scientific research and monitoring (groups, publications and institutions)	National
2 scientific missions at sea	Scientific campaigns	Scientific research and monitoring (groups, publications and institutions)	National
20 French research labs	French research institutes	Scientific research and monitoring (groups, publications and institutions)	National
24 schoolers in Lycée des Lumières	Schoolers in Mayotte	Students and schoolers in Mayotte	Local
3 injured people	Populations in Mayotte	At-risk populations in Mayotte	Local
3 interdepartmental experts sent in June 2018	Interdepartmental mission in June 2018	Risks and crisis management actors	National
300 children	Schoolers in Mayotte	Students and schoolers in Mayotte	Local
300 millions of francophones	Francophones worldwide	Foreign states, communities and personalities	International
4 scientists involved in the campaign	Scientific campaigns	Scientific research and monitoring (groups, publications and institutions)	National
A boat	Scientific campaigns	Scientific research and monitoring (groups, publications and institutions)	National
A campaign at sea	Scientific campaigns	Scientific research and monitoring (groups, publications and institutions)	National
A campaign coordinated by the CNRS	CNRS	Scientific research and monitoring (groups, publications and institutions)	National
A commission of the Ministry of the Interior	A commission of the Ministry of the Interior	Risks and crisis management actors	National
A committee to select the volcano's name	A committee to select the volcano's name	Local identified personalities	Local
A dense population	Populations in Mayotte	At-risk populations in Mayotte	Local
A documentary of 52 minutes	Documentary Birth of a Volcano	Mass media and associated journalists	National
A double scientific campaign	Scientific campaigns	Scientific research and monitoring (groups, publications and institutions)	National
A family in Mayotte	Populations in Mayotte	At-risk populations in Mayotte	Local
A futur observatory in Mayotte	A futur observatory in Mayotte	Scientific research and monitoring (groups, publications and institutions)	Local/National
A german study	Scientific studies	Scientific research and monitoring (groups, publications and institutions)	International
A hypothetical observatory in Mayotte	A futur observatory in Mayotte	Scientific research and monitoring (groups, publications and institutions)	Local/National
A journalist at France TV	Journalist for France TV	Mass media and associated journalists	Local
A lab in Brest	IFREMER	Scientific research and monitoring (groups, publications and institutions)	National
A mahorese	Populations in Mayotte	At-risk populations in Mayotte	Local
A mission from the GIM	Macroseismic Intervention Group	Scientific research and monitoring (groups, publications and institutions)	National
A new campaign with the Marion Dufresne	Scientific campaigns	Scientific research and monitoring (groups, publications and institutions)	National
A new scientific campaign	Scientific campaigns	Scientific research and monitoring (groups, publications and institutions)	National
A person abroad passionated by seisms	A person abroad passionated by seisms	Foreign states, communities and personalities	International
A policeman in Nosy Be	Municipal police in Madagascar	Public and para-public services to the population (institutions and members)	Regional
A psychiatrist	CHM (Mayotte's hospital)	Public and para-public services to the population (institutions and members)	Local
A psychologist in CHM	CHM (Mayotte's hospital)	Public and para-public services to the population (institutions and members)	Local
A report from BRGM	BRGM	Scientific research and monitoring (groups, publications and institutions)	Local/National
A research group from the university in Mayotte	University of Mayotte	Scientific research and monitoring (groups, publications and institutions)	Local
Team from EOST	EOST	Scientific research and monitoring (groups, publications and institutions)	National
Team from IPGP	IPGP	Scientific research and monitoring (groups, publications and institutions)	National
A scientific campaign	Scientific campaigns	Scientific research and monitoring (groups, publications and institutions)	National
A scientific mission	Scientific campaigns	Scientific research and monitoring (groups, publications and institutions)	National
A scientific mission at sea	Scientific campaigns	Scientific research and monitoring (groups, publications and institutions)	National
A scientific research mission	Scientific campaigns	Scientific research and monitoring (groups, publications and institutions)	National
A seismologist	Geoscientists_undefined	Scientific research and monitoring (groups, publications and institutions)	National
A Stakeholder Committee in case of marine submersion	Actors mobilized in case of marine submersion	Risks and crisis management actors	Local
A study of seismic refraction	Scientific studies	Scientific research and monitoring (groups, publications and institutions)	National
A teacher on land	Teachers in the SISMAORE campaign	Educational staff and institutions	Local
Team of health professionals specialized in psychological support	CHM (Mayotte's hospital)	Public and para-public services to the population (institutions and members)	Local
Team of scientists	Scientists_undefined	Scientific research and monitoring (groups, publications and institutions)	National
A vice-president of the departmental council	Vice-president of the Departmental Council	Elected local officials	Local
French scientific institutes	Scientific campaigns	Scientific research and monitoring (groups, publications and institutions)	National
A witness’ children	Children in Mayotte	At-risk populations in Mayotte	Local
a working group with international and mainland seismologists	Scientific campaigns	Scientific research and monitoring (groups, publications and institutions)	International
A working group with structural engineers	A working group with structural engineers	Scientific research and monitoring (groups, publications and institutions)	National
About 15 people in Mayotte	Populations in Mayotte	At-risk populations in Mayotte	Local
About 20 injured people in Mayotte	Populations in Mayotte	At-risk populations in Mayotte	Local
Academic Inspector for Maths	Educational staff members in Mayotte	Educational staff and institutions	Local
Actors in crisis management	Actors in crisis management	Risks and crisis management actors	National
Actors mobilized in case of marine submersion	Actors mobilized in case of marine submersion	Risks and crisis management actors	Local
Actors operating on the territory of Mayotte	Actors operating on the territory of Mayotte	Divers/Undefined	Local
Administration of French government	French Government	French political institutions	National
Administrations in Mayotte	Administrations in Mayotte	Public and para-public services to the population (institutions and members)	Local
Affected mayors	Affected territorial authorities	Elected local officials	Local
Affected municipalities	Affected territorial authorities	Elected local officials	Local
Affected territorial authorities	Affected territorial authorities	Elected local officials	Local
AFP	AFP	Mass media and associated journalists	National
Agents of the CCAS	Community Social Action Center	Public and para-public services to the population (institutions and members)	Local
Agents of the city of Chirongui	Commune of Chirongui	Public and para-public services to the population (institutions and members)	Local
Agents of the departmental council	Agents of the departmental council	Public and para-public services to the population (institutions and members)	Local
AGU	American Geophysical Union	Scientific research and monitoring (groups, publications and institutions)	International
Airport of Pamandzi	Airport of Pamandzi	Public and para-public services to the population (institutions and members)	Local
Airport of St Denis	Airport of St Denis	Public and para-public services to the population (institutions and members)	Regional
Alexandre Sahal	Alexandre Sahal	Scientific research and monitoring (named individuals)	National
Aline Peltier	Aline Peltier	Scientific research and monitoring (named individuals)	Regional
Associates of Aline Peltier	Associates of Aline Peltier	Scientific research and monitoring (groups, publications and institutions)	Regional
All associations members of the UDAF and dealing with families	UDAF (Departmental Union of Family Associations)	Public and para-public services to the population (institutions and members)	Local
All stakeholders_undefined	All stakeholders_undefined	Divers/Undefined	Undefined
All the actors	All stakeholders_undefined	Divers/Undefined	Undefined
American billionaire Paul Allen	American billionaire Paul Allen	Foreign states, communities and personalities	International
An assistant of prevention and security at the college of Koungou	Educational staff members in Mayotte	Educational staff and institutions	Local
An inhabitant in Iloni	Populations in Mayotte	At-risk populations in Mayotte	Local
An injured person	Populations in Mayotte	At-risk populations in Mayotte	Local
An inspector of the National Education	Educational staff members in Mayotte	Educational staff and institutions	Local
International team of scientists	Scientific studies	Scientific research and monitoring (groups, publications and institutions)	International
An observation mission	Scientific campaigns	Scientific research and monitoring (groups, publications and institutions)	National
An oceanographic campaign carried out with the ship Marion-Dufresne	Scientific campaigns	Scientific research and monitoring (groups, publications and institutions)	National
An operations group led by the chief of staff of the defense and civil protection zone	Zone and civil protection staff of the Indian Ocean	Risks and crisis management actors	Regional
An other campaign with the Marion Dufresne	Scientific campaigns	Scientific research and monitoring (groups, publications and institutions)	National
An other scientific campaign	Scientific campaigns	Scientific research and monitoring (groups, publications and institutions)	National
An other ship	Scientific campaigns	Scientific research and monitoring (groups, publications and institutions)	National
An upcoming *scientific* mission	Scientific campaigns	Scientific research and monitoring (groups, publications and institutions)	National
Andrea Di Muro	Andrea Di Muro	Scientific research and monitoring (named individuals)	National
Andrieu_Arnoud_SIPA	Illustration journalist sources	Mass media and associated journalists	National
Andry Ramanantsoa	Andry Ramanantsoa	Scientific research and monitoring (named individuals)	Regional
Anne Le Friant	Anne Le Friant	Scientific research and monitoring (named individuals)	National
Anne Lemoine	Anne Lemoine	Scientific research and monitoring (named individuals)	National
Anne Perzo journalist for the JDM	Anne Perzo for the Journal of Mayotte	Mass media and associated journalists	Local
Another team of the TelluS Mayotte campaign	Scientific campaign TelluS Mayotte	Scientific research and monitoring (groups, publications and institutions)	National
Antoine Schlupp	Antoine Schlupp	Scientific research and monitoring (named individuals)	National
Anxious people in Mayotte	Populations in Mayotte	At-risk populations in Mayotte	Local
Anyone who wants to know about what happens offshore	Populations in Mayotte	At-risk populations in Mayotte	Local
Apps enthusiasts	Populations in Mayotte	At-risk populations in Mayotte	Local
Arnaud Lemarchand	Arnaud Lemarchand	Scientific research and monitoring (named individuals)	National
ARS	Regional Health Agency	Public and para-public services to the population (institutions and members)	Local
ARS Indian Ocean	Regional Health Agency	Public and para-public services to the population (institutions and members)	Regional
Association of Nurses of Mayotte	Association of Nurses of Mayotte	Civil society, private sector and NGOs	Local
Associations recognised as civil protection actors	Associations recognised as civil protection actors	Risks and crisis management actors	Local
Atlas des Risques de Mayotte	Scientific studies	Scientific research and monitoring (groups, publications and institutions)	National
Attending journalists	Journalists_undefined	Mass media and associated journalists	Local
Audru et al.	Scientific studies	Scientific research and monitoring (groups, publications and institutions)	National
Authorities	Authorities in charge of civil protection	Risks and crisis management actors	National
Authorities in BRGM	BRGM	Scientific research and monitoring (groups, publications and institutions)	National
Authorities in charge of civil protection	Authorities in charge of civil protection	Risks and crisis management actors	National
Authorities of the Préfecture	Préfecture of Mayotte	Risks and crisis management actors	Local
Bacoco Saïd	Imaginary character for risk communication	Divers/Undefined	Local
Bacoco Saïd’s grandchild	Imaginary character for risk communication	Divers/Undefined	Local
Bastien Colas	Bastien Colas	Scientific research and monitoring (named individuals)	National
BathyMay	Scientific campaign BathyMay	Scientific research and monitoring (groups, publications and institutions)	Local
BCSF	BCSF	Scientific research and monitoring (groups, publications and institutions)	National
BCSF-RENASS	BCSF-RENASS	Scientific research and monitoring (groups, publications and institutions)	National
Bernard Thomassin	Bernard Thomassin	Scientific research and monitoring (named individuals)	National
Biodivertissons-nous schoolers association	Biodivertissons-nous schoolers association	Civil society, private sector and NGOs	Local
BRGM	BRGM	Scientific research and monitoring (groups, publications and institutions)	Local/National
BRGM in Mayotte	BRGM	Scientific research and monitoring (groups, publications and institutions)	Local
BRGM in Orleans	BRGM	Scientific research and monitoring (groups, publications and institutions)	National
BRGM seismic catalog	BRGM	Scientific research and monitoring (groups, publications and institutions)	National
British people in 1831	Other populations	Foreign states, communities and personalities	International
Building owners in Mayotte	Populations in Mayotte	At-risk populations in Mayotte	Local
Building professionals	Building professionals	Civil society, private sector and NGOs	Local
Cadis in Mayotte	Religious leaders in Mayotte	Civil society, private sector and NGOs	Local
Campaign organizers	Scientific campaigns leaders	Scientific research and monitoring (groups, publications and institutions)	National
Candidate Issoufi Maandhui for the municipality of Pamandzi	Candidate Issoufi Maandhui for the municipality of Pamandzi	Elected local officials	Local
Candidate Issoufi Maandhuifor's team	Candidate Issoufi Maandhuifor's team	Elected local officials	Local
Candidate Manfou Index for the municipality of Dzaoudzi-Labattoir	Candidate Manfou Index for the municipality of Dzaoudzi-Labattoir	Elected local officials	Local
Capitan of Marion Dufresne	Capitan of Marion Dufresne	Scientific research and monitoring (groups, publications and institutions)	National
Carole Berthod	Carole Berthod	Scientific research and monitoring (named individuals)	National
CatNat cell	CatNat cell	Risks and crisis management actors	National
CCAS in Chirongui	Community Social Action Center	Public and para-public services to the population (institutions and members)	Local
CCAS in Koungou	Community Social Action Center	Public and para-public services to the population (institutions and members)	Local
CCAS in Mamoudzou	Community Social Action Center	Public and para-public services to the population (institutions and members)	Local
CCGM	Geological map of the world commission	Scientific research and monitoring (groups, publications and institutions)	International
CCI	CCI (Chamber of Commerce and Industry)	Public and para-public services to the population (institutions and members)	National
Certain officials	Officials in Mayotte	Elected local officials	Local
Cesca et al.	Scientific studies	Scientific research and monitoring (groups, publications and institutions)	International
Charles Platiau_REUTERS	Illustration journalist sources	Mass media and associated journalists	National
Charline Guéri	Charline Guéri	Scientific research and monitoring (named individuals)	National
Charlotte Mucig	Charlotte Mucig	Scientific research and monitoring (named individuals)	Local
Chastity Aiken	Chastity Aiken	Scientific research and monitoring (named individuals)	National
Chief of schools	Schools administration in Mayotte	Educational staff and institutions	Local
Chief of staff of the civil aircraft safety	Chief of staff of the civil aircraft safety	Risks and crisis management actors	Regional
Chief of staff of the Préfecture	Chief of staff of the Préfecture	Risks and crisis management actors	Local
Chief of staff of the Vice-Rectorat of Mayotte	Chief of staff of the Rectorat of Mayotte	Educational staff and institutions	Local
Chief of the civil aircraft safety in Indian Ocean	Chief of the civil aircraft safety in Indian Ocean	Risks and crisis management actors	Regional
Chiefs of rescue services in Mayotte	Chiefs of rescue services in Mayotte	Public and para-public services to the population (institutions and members)	Local
Chiefs of schools	Schools administration in Mayotte	Educational staff and institutions	Local
Children	Children in Mayotte	At-risk populations in Mayotte	Local
Children born in Mayotte	Children in Mayotte	At-risk populations in Mayotte	Local
Children in Schools	Schoolers in Mayotte	Students and schoolers in Mayotte	Local
CHM	CHM (Mayotte's hospital)	Public and para-public services to the population (institutions and members)	Local
Christiane Grappin	Christiane Grappin	Scientific research and monitoring (named individuals)	National
Christophe Castagne	Christophe Castagne	Mass media and associated journalists	National
Christophe Sira	Christophe Sira	Scientific research and monitoring (named individuals)	National
Citizen in Chirongui	Populations in Mayotte	At-risk populations in Mayotte	Local
Civil protection	Civil protection	Risks and crisis management actors	National
CNES	CNES	Scientific research and monitoring (groups, publications and institutions)	International
CNRS	CNRS	Scientific research and monitoring (groups, publications and institutions)	National
CNRS-INSU	CNRS	Scientific research and monitoring (groups, publications and institutions)	National
College of Physicians	College of Physicians	Scientific research and monitoring (groups, publications and institutions)	National
Collegues of Didier Bertil	Associates of Didier Bertil	Scientific research and monitoring (groups, publications and institutions)	National
Commune of Acoua	Commune of Acoua	Public and para-public services to the population (institutions and members)	Local
Commune of Chirongui	Commune of Chirongui	Public and para-public services to the population (institutions and members)	Local
Commune of Dembéni	Commune of Dembéni	Public and para-public services to the population (institutions and members)	Local
Commune of Dzaoudzi-Labattoir	Commune of Dzaoudzi-Labattoir	Elected local officials	Local
Commune of Labattoir	Commune of Dzaoudzi-Labattoir	Public and para-public services to the population (institutions and members)	Local
Commune of Mamoudzou	Commune of Mamoudzou	Public and para-public services to the population (institutions and members)	Local
Commune of Mtsamboro	Commune of Mtsamboro	Public and para-public services to the population (institutions and members)	Local
Communes	Communes of Mayotte	Public and para-public services to the population (institutions and members)	Local
Communes' staffs	Communes of Mayotte	Public and para-public services to the population (institutions and members)	Local
Communication section of Préfecture of Mayotte	Préfecture of Mayotte	Risks and crisis management actors	Local
Confederation of Small and Medium-sized Enterprises	Confederation of Small and Medium-sized Enterprises	Civil society, private sector and NGOs	Local
Conservation Officer at the Museum of Mayotte	Conservation Officer at the Museum of Mayotte	Civil society, private sector and NGOs	Local
Consumers in Mayotte	Populations in Mayotte	At-risk populations in Mayotte	Local
Contractual teachers in Mayotte	Teachers in Mayotte	Educational staff and institutions	Local
CRESTAR_L'EOLIENNE	CRESTAR_L'EOLIENNE	Mass media and associated journalists	National
Crew on Le Pourquoi Pas	Le Pourquoi Pas from IFREMER	Scientific research and monitoring (groups, publications and institutions)	Local/National
Crew of SISMAORE	Crew of SISMAORE	Scientific research and monitoring (groups, publications and institutions)	Local/National
Crew on Marion Dufresne	Crew of Marion Dufresne	Scientific research and monitoring (groups, publications and institutions)	Local/National
Crew on Le Champlain	Crew of Le Champlain	Scientific research and monitoring (groups, publications and institutions)	Local/National
Marion Dufresne crew’s families	Crew’s families of Marion Dufresne	Scientific research and monitoring (groups, publications and institutions)	International
Crisis unit in the departmental council	Crisis unit in the Departmental Council	Risks and crisis management actors	Local
Crisis management services	Crisis management services	Risks and crisis management actors	Local/National
Crisis unit_undefined	Crisis unit in the Departmental Council	Risks and crisis management actors	Local
Crisis unit in rectorat and préfecture	Crisis unit in rectorat and préfecture	Risks and crisis management actors	Local
CSSM	Mayotte Social Security Fund	Public and para-public services to the population (institutions and members)	Local
Current municipal police	Municipal police in Mayotte	Public and para-public services to the population (institutions and members)	Local
D. Pierre	Delphine Pierre	Scientific research and monitoring (named individuals)	National
DEAL	DEAL (Department of the Environment, Planning and Housing)	Public and para-public services to the population (institutions and members)	Local
Dedicated services in case of big earthquake	Dedicated services in case of big earthquake	Risks and crisis management actors	National
Department of Mayotte	Department of Mayotte	Elected local officials	Local
Departmental advisor Chihaboudine Ben Youssouf	Departmental advisor Chihaboudine Ben Youssouf	Elected local officials	Local
Departmental advisors	Department of Mayotte	Elected local officials	Local
Departmental council	Department of Mayotte	Elected local officials	Local
Deputy Director of SIDPC	Deputy Director of SIDPC	Risks and crisis management actors	Local
Deputy Managing Director of SFR Réunion	Deputy Managing Director of SFR Réunion	Civil society, private sector and NGOs	Regional
Deputy mayor in charge of development in Mamoudzou	Deputy mayor in charge of development in Mamoudzou	Elected local officials	Local
Dictation Bolée organizers	Dictation Bolée organizers	Civil society, private sector and NGOs	Local
Dictation Bolée participants	Dictation Bolée participants	At-risk populations in Mayotte	Local
Didier Bertil	Didier Bertil	Scientific research and monitoring (named individuals)	National
Different research teams on field	Scientific campaigns	Scientific research and monitoring (groups, publications and institutions)	National
Different seismological observatories	Different seismological observatories	Scientific research and monitoring (groups, publications and institutions)	International
Director General of Services in Koungou	Director General of Services in Koungou	Elected local officials	Local
Director of CHM	Director of CHM	Public and para-public services to the population (institutions and members)	Local
Directorate of Public Works	Directorate of Public Works	Public and para-public services to the population (institutions and members)	Local
DIRMOM	DIRMOM	Risks and crisis management actors	National
Disabled persons in Mayotte	Populations in Mayotte	At-risk populations in Mayotte	Local
Documentary Birth of a Volcano	Documentary Birth of a Volcano	Mass media and associated journalists	National
Early sleepers in Mayotte	Populations in Mayotte	At-risk populations in Mayotte	Local
eartharxiv website	eartharxiv website	Scientific research and monitoring (groups, publications and institutions)	International
Economic actors in Mayotte	Economic actors in Mayotte	Civil society, private sector and NGOs	Local
Edouard Régis	Edouard Régis	Scientific research and monitoring (named individuals)	National
Elected official	Elected local officials	Elected local officials	Local
Elected officials	Elected local officials	Elected local officials	Local
Elected officials from the department	Department of Mayotte	Elected local officials	Local
Electricity of Mayotte	Electricity of Mayotte	Civil society, private sector and NGOs	Local
Eleonora Rivalta	Eleonora Rivalta	Scientific research and monitoring (named individuals)	International
Emergency services	Emergency services	Public and para-public services to the population (institutions and members)	Local
Emilie Lagahé	Emilie Lagahé	Scientific research and monitoring (named individuals)	National
Emmanuel Rinnert	Emmanuel Rinnert	Scientific research and monitoring (named individuals)	National
Employees	Populations in Mayotte	At-risk populations in Mayotte	Local
EMSC	EMSC	Scientific research and monitoring (groups, publications and institutions)	International
EMSO	EMSO	Scientific research and monitoring (groups, publications and institutions)	International
ENS	ENS	Scientific research and monitoring (groups, publications and institutions)	National
EOS journal	EOS journal	Scientific research and monitoring (groups, publications and institutions)	International
EOST	EOST	Scientific research and monitoring (groups, publications and institutions)	National
Eric Humler	Eric Humler	Scientific research and monitoring (named individuals)	National
Eric Jacques	Eric Jacques	Scientific research and monitoring (named individuals)	National
ETPC society	ETPC society	Civil society, private sector and NGOs	Local
Evacuated family	Populations in Mayotte	At-risk populations in Mayotte	Local
Evacuated people in Mayotte	Populations in Mayotte	At-risk populations in Mayotte	Local
Everybody experimenting an earthquake	Populations in Mayotte	At-risk populations in Mayotte	Local
Expert cabinet to ascertain the damage	Experts enterprise to ascertain the damage	Civil society, private sector and NGOs	Local
Expert_undefined	Expert_undefined	Civil society, private sector and NGOs	Local
Experts enterprise to ascertain the damage	Experts enterprise to ascertain the damage	Civil society, private sector and NGOs	Local
Experts from BCSF	BCSF	Scientific research and monitoring (groups, publications and institutions)	National
Experts from GIM	Macroseismic Intervention Group	Scientific research and monitoring (groups, publications and institutions)	National
Experts from RENASS	RENASS	Scientific research and monitoring (groups, publications and institutions)	National
Experts from REVOSIMA	REVOSIMA	Scientific research and monitoring (groups, publications and institutions)	National
Experts from the interdepartmental expertise mission in June 2018	Interdepartmental mission in June 2018	Risks and crisis management actors	National
Experts in civil protection	Experts in civil protection	Risks and crisis management actors	National
Experts in crisis management in Mayotte	Experts in crisis management in Mayotte	Risks and crisis management actors	Local
Seismologists mission in June 2018	Seismologists mission in June 2018	Scientific research and monitoring (groups, publications and institutions)	National
Experts in seismology and tectonics	Geoscientists_undefined	Scientific research and monitoring (groups, publications and institutions)	National
Experts to ascertain the damage	Experts to ascertain the damage from Prefecture	Civil society, private sector and NGOs	Local
Experts_undefined	Experts_undefined	Scientific research and monitoring (groups, publications and institutions)	National
Fabien Paquet	Fabien Paquet	Scientific research and monitoring (named individuals)	National
Facebook	Facebook	Social medias/Internet	International
Facebook page of the mayor of Chirongui	Facebook page of the mayor of Chirongui	Social medias/Internet	Local
Facebook page of the préfet of Mayotte	Facebook page of the préfet of Mayotte	Social medias/Internet	Local
Families in Mayotte	Populations in Mayotte	At-risk populations in Mayotte	Local
Families who stayed in Mayotte	Populations in Mayotte	At-risk populations in Mayotte	Local
Faoullia in charge of the Research Innovation mission at the rectorate	Faoullia in charge of the Research Innovation mission at the rectorate	Educational staff and institutions	Local
Félix Leger	Félix Leger	Scientific research and monitoring (named individuals)	National
Filmmaker Pascal Crésegut	Filmmaker Pascal Crésegut	Mass media and associated journalists	National
Firemen	Firemen	Risks and crisis management actors	Local
First mission of scientists	Scientific campaigns	Scientific research and monitoring (groups, publications and institutions)	National
First vice-president of the Departmental Council	Vice-president of the Departmental Council	Elected local officials	Local
Fishermen	Fishermen of Mayotte	At-risk populations in Mayotte	Local
Fishermen leader Abdallah Issoufi	Fishermen leader Abdallah Issoufi	Local identified personalities	Local
Fishermen of Mayotte	Fishermen of Mayotte	At-risk populations in Mayotte	Local
Fishermen of Petite-Terre and M’tsapéré	Fishermen of Mayotte	At-risk populations in Mayotte	Local
Fishmongers of Mayotte	Fishmongers of Mayotte	At-risk populations in Mayotte	Local
Five injured people	Populations in Mayotte	At-risk populations in Mayotte	Local
Four ministers	French ministers	French political institutions	National
FranceSeisme	FranceSeisme	Scientific research and monitoring (groups, publications and institutions)	National
Franck Lavigne	Franck Lavigne	Scientific research and monitoring (named individuals)	National
François Houllier	François Houllier	Scientific research and monitoring (named individuals)	National
Freddy Vinet	Freddy Vinet	Scientific research and monitoring (named individuals)	National
Frédéric Leone	Frédéric Leone	Scientific research and monitoring (named individuals)	National
Frédéric Mortier from the DIRMOM	Frédéric Mortier from the DIRMOM	Risks and crisis management actors	National
Frédéric Tronel	Frédéric Tronel	Scientific research and monitoring (named individuals)	Local
French administration	French administration	Public and para-public services to the population (institutions and members)	National
French army	French army	Public and para-public services to the population (institutions and members)	National
French enterprises	French enterprises	Civil society, private sector and NGOs	National
French experts_undefined	French experts_undefined	Divers/Undefined	National
French military units	French military crisis units	Risks and crisis management actors	National
French research institutes	French research institutes	Scientific research and monitoring (groups, publications and institutions)	National
French scientific community	French scientific community	Scientific research and monitoring (groups, publications and institutions)	National
French scientific institutions	French research institutes	Scientific research and monitoring (groups, publications and institutions)	National
French seismologists working on Mayotte	Scientists involved in the campaigns	Scientific research and monitoring (groups, publications and institutions)	National
French State	French State	French political institutions	National
Fugro society	Fugro society	Civil society, private sector and NGOs	National
Futura Science newspaper	Futura Science newspaper	Social medias/Internet	International
Future research platform set up by the Ministry of Research	Future research platform set up by the Ministry of Research	Scientific research and monitoring (groups, publications and institutions)	Local
Gabriel Barathieu_Biosphoto	Illustration journalist sources	Mass media and associated journalists	National
Gaëlle Benatre	Gaëlle Benatre	Scientific research and monitoring (named individuals)	National
Gendarmerie	Gendarmerie	Public and para-public services to the population (institutions and members)	Local
Gendarmerie Air Section and High Mountain Gendarmerie Platoon	Gendarmerie Air Section and High Mountain Gendarmerie Platoon	Risks and crisis management actors	National
General Secretary of the Mahorese Federation of Environmental Associations	General Secretary of the Mahorese Federation of Environmental Associations	Civil society, private sector and NGOs	Local
Geneviève Dennetiere from ARS	Regional Health Agency	Public and para-public services to the population (institutions and members)	Local
GEOFLAMME	Scientific campaign GEOFLAMME	Scientific research and monitoring (groups, publications and institutions)	National
GeoForschungsZentrum	GeoForschungsZentrum	Scientific research and monitoring (groups, publications and institutions)	International
Geologists	Geoscientists_undefined	Scientific research and monitoring (groups, publications and institutions)	Undefined
Geologists from OVPF	OVPF	Scientific research and monitoring (groups, publications and institutions)	Regional
Geologists_undefined	Geoscientists_undefined	Scientific research and monitoring (groups, publications and institutions)	Undefined
Geophysicists	Geoscientists_undefined	Scientific research and monitoring (groups, publications and institutions)	Undefined
Geophysicists from REVOSIMA	REVOSIMA	Scientific research and monitoring (groups, publications and institutions)	National
Geoscientists_undefined	Geoscientists_undefined	Scientific research and monitoring (groups, publications and institutions)	Undefined
GIM	Macroseismic Intervention Group	Scientific research and monitoring (groups, publications and institutions)	National
Göran Ekström	Göran Ekström	Scientific research and monitoring (named individuals)	International
Grand Cadi de Mayotte	Religious leaders in Mayotte	Civil society, private sector and NGOs	Local
Guilhem Barruol	Guilhem Barruol	Scientific research and monitoring (named individuals)	Regional
Head of mission Biodiversity Indian Ocean	Head of mission Biodiversity Indian Ocean	Public and para-public services to the population (institutions and members)	Regional
Head of the Interdepartmental Service for Civil Defense and Protection	Head of the Interdepartmental Service for Civil Defense and Protection	Risks and crisis management actors	National
Headmaster of a high school in Petite Terre	Schools administration in Mayotte	Educational staff and institutions	Local
Headmaster of junior high school in Pamandzi	Schools administration in Mayotte	Educational staff and institutions	Local
Heads of schools	Schools administration in Mayotte	Educational staff and institutions	Local
Health cabinets	Health services	Public and para-public services to the population (institutions and members)	Local
Health services	Health services	Public and para-public services to the population (institutions and members)	Local
Health staff in Mayotte	Health services	Public and para-public services to the population (institutions and members)	Local
Health structures intervening at home	Health services	Public and para-public services to the population (institutions and members)	Local
Hélène Ondréas	Hélène Ondréas	Scientific research and monitoring (named individuals)	National
HERE	Illustration journalist sources	Mass media and associated journalists	National
High school in Kahani	Schools in Mayotte	Students and schoolers in Mayotte	Local
High school of Mamoudzou Nord	Schools in Mayotte	Students and schoolers in Mayotte	Local
High schooler in Mayotte	Schoolers in Mayotte	Students and schoolers in Mayotte	Local
High schoolers in Kahani	Schoolers in Mayotte	Students and schoolers in Mayotte	Local
High schoolers in Kaweni	Schoolers in Mayotte	Students and schoolers in Mayotte	Local
High schoolers in Mamoudzou	Schoolers in Mayotte	Students and schoolers in Mayotte	Local
High schoolers in Mayotte	Schoolers in Mayotte	Students and schoolers in Mayotte	Local
High schoolers in Tsararano	Schoolers in Mayotte	Students and schoolers in Mayotte	Local
Home Physiotherapy Service	Health services	Public and para-public services to the population (institutions and members)	Local
Hyper sensitive peoples in Mayotte	Populations in Mayotte	At-risk populations in Mayotte	Local
IFREMER	IFREMER	Scientific research and monitoring (groups, publications and institutions)	National
IFREMER in Brest	IFREMER	Scientific research and monitoring (groups, publications and institutions)	National
IGN	IGN	Scientific research and monitoring (groups, publications and institutions)	National
IGN_SGN	IGN	Scientific research and monitoring (groups, publications and institutions)	National
ILICO	ILICO	Scientific research and monitoring (groups, publications and institutions)	National
Impacted families in Mayotte	Populations in Mayotte	At-risk populations in Mayotte	Local
Individuals in Mayotte	Populations in Mayotte	At-risk populations in Mayotte	Local
Inhabitants	Populations in Mayotte	At-risk populations in Mayotte	Local
Inhabitants at-risk	Populations in Mayotte	At-risk populations in Mayotte	Local
Inhabitants in Bandrélé	Populations in Mayotte	At-risk populations in Mayotte	Local
Inhabitants in Iceland	Other populations	Foreign states, communities and personalities	International
Inhabitants in Koungou	Populations in Mayotte	At-risk populations in Mayotte	Local
Inhabitants in Mamoudzou	Populations in Mayotte	At-risk populations in Mayotte	Local
Inhabitants in Mayotte	Populations in Mayotte	At-risk populations in Mayotte	Local
Inhabitants in South of Mayotte	Populations in Mayotte	At-risk populations in Mayotte	Local
Inhabitants who live on the shoreline in Mayotte	Populations in Mayotte	At-risk populations in Mayotte	Local
Injured people in Mayotte	Populations in Mayotte	At-risk populations in Mayotte	Local
INSEE	INSEE	Scientific research and monitoring (groups, publications and institutions)	National
Institutes for seismic monitoring	Institutes for seismic monitoring	Scientific research and monitoring (groups, publications and institutions)	Undefined
Institutes from REVOSIMA	REVOSIMA	Scientific research and monitoring (groups, publications and institutions)	National
Institutions from MARMOR	MARMOR	Scientific research and monitoring (groups, publications and institutions)	National
INSU	INSU	Scientific research and monitoring (groups, publications and institutions)	National
INSU_CNRS	CNRS	Scientific research and monitoring (groups, publications and institutions)	National
Insured owners	Populations in Mayotte	At-risk populations in Mayotte	Local
Insured persons	Populations in Mayotte	At-risk populations in Mayotte	Local
Interdepartmental expertise mission in June 2018	Interdepartmental mission in June 2018	Risks and crisis management actors	National
Interministerial statement	Interministerial statement	Risks and crisis management actors	National
International centers for seismic monitoring	Institutes for seismic monitoring	Scientific research and monitoring (groups, publications and institutions)	International
International community	International community	Foreign states, communities and personalities	International
International institutes social medias	International institutes social medias	Social medias/Internet	International
International institutes websites	International institutes websites	Social medias/Internet	International
International institutes websites’ applications	International institutes websites’ applications	Social medias/Internet	International
International organisms for seismic monitoring	Institutes for seismic monitoring	Scientific research and monitoring (groups, publications and institutions)	International
International press	International press	Mass media and associated journalists	International
International scientific institutes	International scientific institutes	Scientific research and monitoring (groups, publications and institutions)	International
International webs for seismic monitoring	International webs for seismic monitoring	Scientific research and monitoring (groups, publications and institutions)	International
Internet	Internet	Social medias/Internet	International
Internet users	Internet	Social medias/Internet	Local
Internet users in Mayotte	Internet	Social medias/Internet	Local
Investisors in Mayotte	Investisors in Mayotte	At-risk populations in Mayotte	Local
Involved actors	All stakeholders_undefined	Divers/Undefined	Undefined
Involved institutional actors	Involved institutional actors	Risks and crisis management actors	Undefined
Involved researchers	Scientists involved in the campaigns	Scientific research and monitoring (groups, publications and institutions)	Undefined
Involved scientists	Scientists involved in the campaigns	Scientific research and monitoring (groups, publications and institutions)	Undefined
IPGP	IPGP	Scientific research and monitoring (groups, publications and institutions)	National
IPGP_OVSG	IPGP	Scientific research and monitoring (groups, publications and institutions)	National
IPGP's partners	Associates of IPGP	Scientific research and monitoring (groups, publications and institutions)	National
IPGS	IPGS	Scientific research and monitoring (groups, publications and institutions)	National
IRD	IRD	Scientific research and monitoring (groups, publications and institutions)	National
IRMA	IRMA	Scientific research and monitoring (groups, publications and institutions)	National
Isabelle Thinon	Isabelle Thinon	Scientific research and monitoring (named individuals)	National
Italian people in 1831	Other populations	Foreign states, communities and personalities	International
IUEM	IUEM	Scientific research and monitoring (groups, publications and institutions)	International
Jean-Christophe Komorowski	Jean-Christophe Komorowski	Scientific research and monitoring (named individuals)	National
Jean-Marie Saurel	Jean-Marie Saurel	Scientific research and monitoring (named individuals)	National
Jean-Michel Audibert	Jean-Michel Audibert	Risks and crisis management actors	National
Jean-Michel Baltassat	Jean-Michel Baltassat	Scientific research and monitoring (named individuals)	National
Journal of Geophysical Research	Journal of Geophysical Research	Scientific research and monitoring (groups, publications and institutions)	International
Journal of La Reunion	Journal of La Reunion	Mass media and associated journalists	Regional
Journal of Mayotte	Journal of Mayotte	Mass media and associated journalists	Local
Journalists	Journalists_undefined	Mass media and associated journalists	Local
Julien Tredan-Turini	Illustration journalist sources	Mass media and associated journalists	National
Junior high school in Kani-kéli	Schools in Mayotte	Students and schoolers in Mayotte	Local
Junior high school in Kwalé	Schools in Mayotte	Students and schoolers in Mayotte	Local
Junior high schoolers in Kawéni 2	Schoolers in Mayotte	Students and schoolers in Mayotte	Local
Junior high schoolers in Labattoir	Schoolers in Mayotte	Students and schoolers in Mayotte	Local
Junior high schoolers in Mayotte	Schoolers in Mayotte	Students and schoolers in Mayotte	Local
Junior high schools	Schools in Mayotte	Students and schoolers in Mayotte	Local
Ken Rubin	Ken Rubin	Scientific research and monitoring (named individuals)	International
Kenya's seismological observatory	Kenya's seismological observatory	Scientific research and monitoring (groups, publications and institutions)	Regional
Kwezi TV	Kwezi TV	Mass media and associated journalists	Local
La Croix	La Croix	Mass media and associated journalists	National
Labs of INSU-CNRS in Strasbourg Toulouse and Grenoble	CNRS	Scientific research and monitoring (groups, publications and institutions)	National
Laure Fallou	Laure Fallou	Scientific research and monitoring (named individuals)	National
Laurent Floch	Laurent Floch	Scientific research and monitoring (named individuals)	Local
Laurent Michon	Laurent Michon	Scientific research and monitoring (named individuals)	Regional
Le Blob newspaper	Le Blob newspaper	Mass media and associated journalists	National
Le Champlain from the national navy	Le Champlain from the national navy	Scientific research and monitoring (groups, publications and institutions)	National
Le Gauss	Le Gauss from Fugro Compagnie	Scientific research and monitoring (groups, publications and institutions)	National
Crew on Le Gauss	Le Gauss from Fugro Compagnie	Scientific research and monitoring (groups, publications and institutions)	National
Le Gauss from Fugro Compagnie	Le Gauss from Fugro Compagnie	Scientific research and monitoring (groups, publications and institutions)	National
Le Monde	Le Monde	Mass media and associated journalists	National
Le Pourquoi Pas from IFREMER	Le Pourquoi Pas from IFREMER	Scientific research and monitoring (groups, publications and institutions)	National
Lemoine et al 2019	Scientific studies	Scientific research and monitoring (groups, publications and institutions)	National
Life science teachers onboard	Teachers in the SISMAORE campaign	Educational staff and institutions	Local
Lise Retailleau	Lise Retailleau	Scientific research and monitoring (named individuals)	Regional
Local authorities	Local authorities	Risks and crisis management actors	Local
Local elected	Elected local officials	Elected local officials	Local
Local elected municipal officials	Elected local officials	Elected local officials	Local
Local elected officials	Elected local officials	Elected local officials	Local
Local journalists	Local journalists	Mass media and associated journalists	Local
Local medias	Local medias	Mass media and associated journalists	Local
Local personalities	Local personalities	Local identified personalities	Local
Local press	Local press	Mass media and associated journalists	Local
Local radio	Local radio	Mass media and associated journalists	Local
Local territorial collectivities	Territorial collectivities in Mayotte	Public and para-public services to the population (institutions and members)	Local
Local TV	Local TV	Mass media and associated journalists	Local
Long runway project committee	Long runway project committee	Civil society, private sector and NGOs	Local
LREM party	LREM party	Elected local officials	Local/National
Lt-colonel Galichet	Lt-colonel Galichet	Risks and crisis management actors	National
Luca Vergallo from the Prefect's Office	Luca Vergallo from the Prefect's Office	Risks and crisis management actors	Local
Lucia Gurioli	Lucia Gurioli	Scientific research and monitoring (named individuals)	National
Ludovic Laï-Yu photograph	Illustration journalist sources	Mass media and associated journalists	National
Madagascar's seismological observatory	Madagascar's seismological observatory	Scientific research and monitoring (groups, publications and institutions)	Regional
Mahorese	Populations in Mayotte	At-risk populations in Mayotte	Local
Mahorese facility users	Populations in Mayotte	At-risk populations in Mayotte	Local
Mahorese in La Reunion	Mahorese in La Reunion	Other populations	Regional
Mahorese population	Populations in Mayotte	At-risk populations in Mayotte	Local
Mahorese women	Populations in Mayotte	At-risk populations in Mayotte	Local
Malgasy authorities	Malgasy authorities	Foreign states, communities and personalities	Regional
Manon Bikert	Manon Bikert	Scientific research and monitoring (named individuals)	National
Marc Chaussidon	Marc Chaussidon	Scientific research and monitoring (named individuals)	National
Marie-Odile Lamirault-Gall	Marie-Odile Lamirault-Gall	Scientific research and monitoring (named individuals)	National
Marine geoscientists from IFREMER	IFREMER	Scientific research and monitoring (groups, publications and institutions)	National
Marine transportation service in Mayotte	Maritime cooperatives	Civil society, private sector and NGOs	Local
Marion Dufresne	Marion Dufresne from IFREMER	Scientific research and monitoring (groups, publications and institutions)	National
Marion Dufresne campaigns	Scientific campaigns	Scientific research and monitoring (groups, publications and institutions)	National
Maritime affairs services	Maritime affairs services	Public and para-public services to the population (institutions and members)	Local
Maritime cooperatives	Maritime cooperatives	Civil society, private sector and NGOs	Local
MARMOR	MARMOR	Scientific research and monitoring (groups, publications and institutions)	Local
Martial Bontemps	Martial Bontemps	Scientific research and monitoring (named individuals)	National
Mathieu Péroche	Mathieu Péroche	Scientific research and monitoring (named individuals)	National
MAYOBS	Scientific campaigns MAYOBS	Scientific research and monitoring (groups, publications and institutions)	National
MAYOBS 1	Scientific campaign MAYOBS 1	Scientific research and monitoring (groups, publications and institutions)	National
MAYOBS 13	Scientific campaign MAYOBS 13	Scientific research and monitoring (groups, publications and institutions)	National
MAYOBS 13-1	Scientific campaign MAYOBS 13	Scientific research and monitoring (groups, publications and institutions)	National
MAYOBS 13-2	Scientific campaign MAYOBS 13	Scientific research and monitoring (groups, publications and institutions)	National
MAYOBS 15	Scientific campaign MAYOBS 15	Scientific research and monitoring (groups, publications and institutions)	National
MAYOBS 2	Scientific campaign MAYOBS 2	Scientific research and monitoring (groups, publications and institutions)	National
MAYOBS 2 on Marion Dufresne	Scientific campaign MAYOBS 2	Scientific research and monitoring (groups, publications and institutions)	National
MAYOBS 3	Scientific campaign MAYOBS 3	Scientific research and monitoring (groups, publications and institutions)	National
MAYOBS 4	Scientific campaign MAYOBS 4	Scientific research and monitoring (groups, publications and institutions)	National
MAYOBS1-4	Scientific campaign MAYOBS 1-4	Scientific research and monitoring (groups, publications and institutions)	National
Mayor _undefined	Mayors in Mayotte	Elected local officials	Local
Mayor of Bandrélé	Mayor of Bandrélé	Elected local officials	Local
Mayor of Chirongui	Mayor of Chirongui	Elected local officials	Local
Mayor of Mamoudzou	Mayor of Mamoudzou	Elected local officials	Local
Mayor of Pamandzi	Mayor of Pamandzi	Elected local officials	Local
Mayor_undefined	Mayors in Mayotte	Elected local officials	Local
Mayors association	Mayors' association	Elected local officials	Local
Mayors in Mayotte	Mayors in Mayotte	Elected local officials	Local
Mayotte Hebdo	Mayotte Hebdo	Mass media and associated journalists	Local
Mayotte la 1ère	Mayotte la 1ère	Mass media and associated journalists	Local
Mayotte la 1ère radio	Mayotte la 1ère	Mass media and associated journalists	Local
Mayotte's deputy Mansour Kamardine	Mayotte's deputy Mansour Kamardine	Elected local officials	Local/National
Mayotte's deputy Thani Mohamed Soilihi	Mayotte's deputy Thani Mohamed Soilihi	Elected local officials	Local/National
Mdzadzé Mroivili in charge of the School Life mission at the vice-rectorate of Mayotte	Mdzadzé Mroivili in charge of the School Life mission at the vice-rectorate of Mayotte	Educational staff and institutions	Local
Medias	Medias_undefined	Mass media and associated journalists	International
Members of GEOFLAMME	Scientific campaign GEOFLAMME	Scientific research and monitoring (groups, publications and institutions)	National
Members of Parliament	French Parliament	French political institutions	National
Members of the scientific team of SISMAORE	Scientific campaign SISMAORE	Scientific research and monitoring (groups, publications and institutions)	National
MAYOBS 13-2	Scientific campaign MAYOBS 13	Scientific research and monitoring (groups, publications and institutions)	National
Mendy Bengoubou	Mendy Bengoubou	Risks and crisis management actors	National
Meretmarine website	Meretmarine website	Social medias/Internet	National
Météo France	Météo France	Scientific research and monitoring (groups, publications and institutions)	National
Michael Roudaut	Michael Roudaut	Scientific research and monitoring (named individuals)	National
Michon et al.	Scientific studies	Scientific research and monitoring (groups, publications and institutions)	Regional
Military	French military crisis units	Risks and crisis management actors	National
Minister for Territorial Cohesion and Relations with Territorial Communities	Minister for Territorial Cohesion and Relations with Territorial Communities	French political institutions	National
Minister of Armies	Minister of Armies	French political institutions	National
Minister of Ecological Transition and Solidarity	Minister of Ecological Transition and Solidarity	French political institutions	National
Minister of Higher Education Research and Innovation	Minister of Higher Education Research and Innovation	French political institutions	National
Minister of Interior	Minister of Interior	French political institutions	National
Minister of National Education	Minister of National Education	French political institutions	National
Minister of Overseas	Minister of Overseas	French political institutions	National
Ministerial authorities in IPGP	IPGP	Scientific research and monitoring (groups, publications and institutions)	National
Ministers	French ministers	French political institutions	National
Ministries	French ministries	French political institutions	National
Ministries' officials	French ministries	French political institutions	National
Ministry of Ecological Transition and Solidarity	Ministry of Ecological Transition and Solidarity	French political institutions	National
Ministry of Finances	Ministry of Finances	French political institutions	National
Ministry of Higher Education Research and Innovation	Ministry of Higher Education Research and Innovation	French political institutions	National
Ministry of Interior	Ministry of Interior	French political institutions	National
Ministry of Overseas	Ministry of Overseas	French political institutions	National
Mission for civil protection	Missions for civil protection	Risks and crisis management actors	National
Mission for civil protection in 2019	Mission for civil protection in 2019	Risks and crisis management actors	National
Mission for civil protection of GIM	Macroseismic Intervention Group	Risks and crisis management actors	National
Mission leaders for SISMAORE	SISMAORE leaders	Scientific research and monitoring (groups, publications and institutions)	National
Mission of BCSF-RENASS	Mission of BCSF-RENASS	Scientific research and monitoring (groups, publications and institutions)	National
Mission to support civil security planning	Mission to support civil security planning	Risks and crisis management actors	National
Missions for civil protection	Missions for civil protection	Risks and crisis management actors	National
Missions of seismologists	Scientific campaigns	Scientific research and monitoring (groups, publications and institutions)	National
Monique Gherardi	Monique Gherardi	Scientific research and monitoring (named individuals)	National
Monitoring and research campaign	Scientific campaigns	Scientific research and monitoring (groups, publications and institutions)	National
Mosquees	Religious leaders in Mayotte	Civil society, private sector and NGOs	Local
Most isolated people in Mayotte	Populations in Mayotte	At-risk populations in Mayotte	Local
Multiple research institutes	REVOSIMA	Scientific research and monitoring (groups, publications and institutions)	International
Municipal police	Municipal police	Public and para-public services to the population (institutions and members)	Local
Municipal policemen	Municipal police	Public and para-public services to the population (institutions and members)	Local
Municipalities	Communes of Mayotte	Public and para-public services to the population (institutions and members)	Local
Municipalities of Mayotte	Municipalities in Mayotte	Elected local officials	Local
Municipality of Bandraboua	Commune of Bandraboua	Public and para-public services to the population (institutions and members)	Local
Municipality of Bandrélé	Commune of Bandrélé	Public and para-public services to the population (institutions and members)	Local
Municipality of Chirongui	Commune of Chirongui	Public and para-public services to the population (institutions and members)	Local
Municipality of Sada	Commune of Sada	Public and para-public services to the population (institutions and members)	Local
Municipality services	Communes of Mayotte	Public and para-public services to the population (institutions and members)	Local
Museum of Mayotte	Museum of Mayotte	Public and para-public services to the population (institutions and members)	Local
Museum of Mayotte agents	Museum of Mayotte	Public and para-public services to the population (institutions and members)	Local
Museum of Mayotte direction	Museum of Mayotte	Public and para-public services to the population (institutions and members)	Local
Museum of Mayotte publics	Populations in Mayotte	At-risk populations in Mayotte	Local
Nathalie Feuillet	Nathalie Feuillet	Scientific research and monitoring (named individuals)	National
Nathalie Feuillet’s team	Associates of Nathalie Feuillet	Scientific research and monitoring (groups, publications and institutions)	National
National civil protection	National civil protection	Risks and crisis management actors	National
National Education staff in Mayotte	Educational staff members in Mayotte	Educational staff and institutions	Local
National Geographic	National Geographic	Mass media and associated journalists	International
National media	National media	Mass media and associated journalists	National
National press	National press	Mass media and associated journalists	National
Natural Marin Parc agents	Natural Marin Parc	Public and para-public services to the population (institutions and members)	Local
Nature Geoscience journal	Nature journals	Scientific research and monitoring (groups, publications and institutions)	International
Nature journal	Nature journals	Scientific research and monitoring (groups, publications and institutions)	International
New oceanographic campaigns	Scientific campaigns	Scientific research and monitoring (groups, publications and institutions)	National
New professionals in REVOSIMA	REVOSIMA	Scientific research and monitoring (groups, publications and institutions)	National
New scientific campaign	Scientific campaigns	Scientific research and monitoring (groups, publications and institutions)	National
New scientific mission at sea	Scientific campaigns	Scientific research and monitoring (groups, publications and institutions)	National
Next missions at sea	Scientific campaigns	Scientific research and monitoring (groups, publications and institutions)	National
Nicolas Taillefer	Nicolas Taillefer	Scientific research and monitoring (named individuals)	National
Non geoscientists	Non geoscientists	Other populations	Local
Non insured people in Mayotte	Populations in Mayotte	At-risk populations in Mayotte	Local
Numerous associations	Associations in Mayotte	Civil society, private sector and NGOs	Local
Numerous geologists worldwide	Geologists worldwide	Scientific research and monitoring (groups, publications and institutions)	International
Numerous inhabitants in Mayotte	Populations in Mayotte	At-risk populations in Mayotte	Local
Numerous mahorese	Populations in Mayotte	At-risk populations in Mayotte	Local
Numerous schools	Schools in Mayotte	Educational staff and institutions	Local
Oceanographic campaign	Scientific campaigns	Scientific research and monitoring (groups, publications and institutions)	National
Oceanographic campaigns	Scientific campaigns	Scientific research and monitoring (groups, publications and institutions)	National
Octopus	Octopus	Foreign states, communities and personalities	International
Official social medias	Official social medias	Social medias/Internet	National
Official websites	Official websites	Social medias/Internet	National
OGS Explora	OGS Explora	Scientific research and monitoring (groups, publications and institutions)	International
Older people in Mayotte	Populations in Mayotte	At-risk populations in Mayotte	Local
One of the agents of the departmental council	Agents of the departement	Public and para-public services to the population (institutions and members)	Local
Orange Telecom	Private enterprises in Mayotte	Civil society, private sector and NGOs	Local/National
Organizers of the symposium in IPGP	IPGP	Scientific research and monitoring (groups, publications and institutions)	National
Other actors involved	Other actors involved	Divers/Undefined	Undefined
Other institutes for seismic monitoring	Institutes for seismic monitoring	Scientific research and monitoring (groups, publications and institutions)	International
Other scientific explorations	Scientific campaigns	Scientific research and monitoring (groups, publications and institutions)	National
Other scientists_undefined	Scientists_undefined	Scientific research and monitoring (groups, publications and institutions)	Undefined
Other teachers in Mayotte	Teachers in Mayotte	Educational staff and institutions	Local
OVPF	OVPF	Scientific research and monitoring (groups, publications and institutions)	Regional
Panicked people in Mayotte	Populations in Mayotte	At-risk populations in Mayotte	Local
Parent representatives	Populations in Mayotte	At-risk populations in Mayotte	Local
Parents	Populations in Mayotte	At-risk populations in Mayotte	Local
Parents in Mayotte	Populations in Mayotte	At-risk populations in Mayotte	Local
Participants at the Science Festival in Mayotte	Populations in Mayotte	At-risk populations in Mayotte	Local
Participants in the Mathematics symposium	Populations in Mayotte	At-risk populations in Mayotte	Local
Pascal Pelleau	Pascal Pelleau	Scientific research and monitoring (named individuals)	National
Patrick Wassmer	Patrick Wassmer	Scientific research and monitoring (named individuals)	National
People eager to contribute	Populations in Mayotte	At-risk populations in Mayotte	Local
People historically injured in Mayotte	Populations in Mayotte	At-risk populations in Mayotte	Local
People in poor health in Mayotte	Populations in Mayotte	At-risk populations in Mayotte	Local
People onsite in Nosy Be	People in Nosy Be	Other populations	Regional
People who have seen their homes damaged by earthquakes	Populations in Mayotte	At-risk populations in Mayotte	Local
People wishing for a psychological support	Populations in Mayotte	At-risk populations in Mayotte	Local
People wishing to testify	Populations in Mayotte	At-risk populations in Mayotte	Local
Permanent commission in the departmental council	Department of Mayotte	Elected local officials	Local
Persons afraid of leaving their village	Populations in Mayotte	At-risk populations in Mayotte	Local
Persons already impacted	Populations in Mayotte	At-risk populations in Mayotte	Local
Persons with eating problems	Populations in Mayotte	At-risk populations in Mayotte	Local
Persons with heavy treatments or at risks	Populations in Mayotte	At-risk populations in Mayotte	Local
Persons with sleeping problems	Populations in Mayotte	At-risk populations in Mayotte	Local
Phil Ouzov	Phil Ouzov	Local identified personalities	Local
Philippe Blanc	Philippe Blanc	Risks and crisis management actors	National
Philippe Kowalski	Philippe Kowalski	Scientific research and monitoring (named individuals)	National
Pierre Briole	Pierre Briole	Scientific research and monitoring (named individuals)	National
Pierre Guyavarch	Pierre Guyavarch	Scientific research and monitoring (named individuals)	National
Pluridisciplinary scientific team	Scientific campaigns	Scientific research and monitoring (groups, publications and institutions)	National
Policemen in Mamoudzou	Municipal police in Mamoudzou	Public and para-public services to the population (institutions and members)	Local
Population	Populations in Mayotte	At-risk populations in Mayotte	Local
Populations at-risk in France	Populations at-risk in France	Other populations	National
Populations living in countries with high seismicity	Other populations	Foreign states, communities and personalities	International
Populations of Chirongui	Populations in Mayotte	At-risk populations in Mayotte	Local
Populations of Dembeni	Populations in Mayotte	At-risk populations in Mayotte	Local
Populations of La Reunion	Population of La Reunion	Other populations	Regional
Populations of Les Antilles	Populations of Les Antilles	Other populations	International
Populations of Comoros islands	Other populations	Other populations
Populations settled in the seaside	Populations in Mayotte	At-risk populations in Mayotte	Local
Pourquoi Pas from IFREMER	Le Pourquoi Pas from IFREMER	Scientific research and monitoring (groups, publications and institutions)	National
Préfecture in La Reunion	Préfecture in La Reunion	Risks and crisis management actors	Regional
Préfecture of Mayotte	Préfecture of Mayotte	Risks and crisis management actors	Local
Préfet of Mayotte	Préfet of Mayotte	Risks and crisis management actors	Local
Pregnant women in Mayotte	Populations in Mayotte	At-risk populations in Mayotte	Local
Preliminary report of REVOSIMA	REVOSIMA	Scientific research and monitoring (groups, publications and institutions)	National
Prem Saddul	Prem Saddul	Scientific research and monitoring (named individuals)	Regional
President of CCI	President of CCI	Civil society, private sector and NGOs	National
President of the association Shimé	Associations in Mayotte	Civil society, private sector and NGOs	Local
President of the departmental council	President of the Departmental Council	Elected local officials	Local
President of the French Republic	President of the French Republic	French political institutions	National
President of UDAF	President of UDAF	Public and para-public services to the population (institutions and members)	Local
Press	Press	Mass media and associated journalists	International
Press in Maurice	Press in Maurice	Mass media and associated journalists	Regional
Primary schools	Schools in Mayotte	Students and schoolers in Mayotte	Local
Prime Minister	Prime Minister	French political institutions	National
Governement state secretary	Governement state secretary	French political institutions	National
Prime minister's office	Prime Minister	French political institutions	National
Private enterprises	Private enterprises in Mayotte	Civil society, private sector and NGOs	Local
Professional fishermen	Village fishermen's committees COVIPEM	Civil society, private sector and NGOs	Local
Professionals from the CHM	CHM (Mayotte's hospital)	Public and para-public services to the population (institutions and members)	Local
Professionals from the Ministry of Ecological Transition and Solidarity	Professionals from the Ministry of Ecological Transition and Solidarity	Risks and crisis management actors	National
Psychological support cell	Cell of psychological support from CHM	Risks and crisis management actors	Local
Psychological support cell for inhabitants	Cell of psychological support from CHM	Risks and crisis management actors	Local
Psychological support cell in CHM	Cell of psychological support from CHM	Risks and crisis management actors	Local
Public authorities	Public authorities	Risks and crisis management actors	National
Qualified professionals in dynamite manipulation	Qualified professionals in dynamite manipulation	Civil society, private sector and NGOs	National
Quand la terre tremble CNRS Editions	CNRS	Scientific research and monitoring (groups, publications and institutions)	National
Radio	Radio	Mass media and associated journalists	Local
Readers of Journal of Mayotte	Readers of Journal of Mayotte	At-risk populations in Mayotte	Local
Rectorate of Mayotte	Rectorate of Mayotte	Educational staff and institutions	Local
REFMAORE	REFMAORE	Scientific research and monitoring (groups, publications and institutions)	National
Regional Delegate for Research and Technology	Regional Delegate for Research and Technology	Scientific research and monitoring (groups, publications and institutions)	Regional
Rémy Bossu	Rémy Bossu	Scientific research and monitoring (named individuals)	International
RENASS	RENASS	Scientific research and monitoring (groups, publications and institutions)	National
Renowned scientific journal	Scientific journals	Scientific research and monitoring (groups, publications and institutions)	International
Representatives of the Ministry of the Interior	Ministry of the Interior	French political institutions	National
Representatives of the various ministries	French ministries	French political institutions	National
Rescue services	Rescue services	Risks and crisis management actors	Local
Rescue teams from Paris and La Reunion	Rescue teams from Paris and La Reunion	Risks and crisis management actors	National
Research labs	Scientific institutes	Scientific research and monitoring (groups, publications and institutions)	National
Research team from University of La Reunion	University of La Reunion	Scientific research and monitoring (groups, publications and institutions)	Regional
Research teams around the volcano	Scientists studying this activity	Scientific research and monitoring (groups, publications and institutions)	National
Research teams from BRGM in Mayotte	BRGM	Scientific research and monitoring (groups, publications and institutions)	Local
Research teams from BRGM in Orleans	BRGM	Scientific research and monitoring (groups, publications and institutions)	National
Scientific teams in MAYOBS	Scientific campaigns MAYOBS	Scientific research and monitoring (groups, publications and institutions)	National
Researchers from IPGP	IPGP	Scientific research and monitoring (groups, publications and institutions)	National
Researchers from MAYOBS	Scientific campaigns MAYOBS	Scientific research and monitoring (groups, publications and institutions)	National
Researchers from OVPF	OVPF	Scientific research and monitoring (groups, publications and institutions)	Regional
Researchers in geophysics	Geoscientists_undefined	Scientific research and monitoring (groups, publications and institutions)	National
Researchers interested in this seismo-volcanic activity	Scientists studying this activity	Scientific research and monitoring (groups, publications and institutions)	International
Researchers working on Mayotte	Scientists studying this activity	Scientific research and monitoring (groups, publications and institutions)	Undefined
Residents in Acoua	Populations in Mayotte	At-risk populations in Mayotte	Local
Residents in Mamoudzou	Populations in Mayotte	At-risk populations in Mayotte	Local
Residents of Chirongui	Populations in Mayotte	At-risk populations in Mayotte	Local
RESIF	RESIF	Scientific research and monitoring (groups, publications and institutions)	National
REVOSIMA	REVOSIMA	Scientific research and monitoring (groups, publications and institutions)	National
Associates of REVOSIMA	Associates of REVOSIMA	Scientific research and monitoring (groups, publications and institutions)	National
REVOSIMA newsletter	REVOSIMA	Scientific research and monitoring (groups, publications and institutions)	National
REVOSIMA newsletter n4	REVOSIMA	Scientific research and monitoring (groups, publications and institutions)	National
REVOSIMA scientific institutions	REVOSIMA	Scientific research and monitoring (groups, publications and institutions)	National
Road management services	Road management services	Public and para-public services to the population (institutions and members)	Local
Robin Lacassin	Robin Lacassin	Scientific research and monitoring (named individuals)	National
Romuald Daniel	Romuald Daniel	Scientific research and monitoring (named individuals)	National
Rumor spreader	Rumor spreader	At-risk populations in Mayotte	Local
Saïd Hachim	Saïd Hachim	Local identified personalities	Local
Saïd Hachim scientists collegues	Saïd Hachim scientific collegues	Scientific research and monitoring (groups, publications and institutions)	National
Saïd Hachim’s supporters	Saïd Hachim’s supporters	At-risk populations in Mayotte	Local
Sailors on Le Pourquoi Pas	Le Pourquoi Pas from IFREMER	Scientific research and monitoring (groups, publications and institutions)	International
Salaries of REVOSIMA	REVOSIMA	Scientific research and monitoring (groups, publications and institutions)	National
SAMU	Emergency services	Public and para-public services to the population (institutions and members)	Local
School classes in Mayotte	Schoolers in Mayotte	Students and schoolers in Mayotte	Local
School of Pamandzi 2	Schools in Mayotte	Educational staff and institutions	Local
School staffs representatives	Schools administration in Mayotte	Educational staff and institutions	Local
Schoolers in Mayotte	Schoolers in Mayotte	Students and schoolers in Mayotte	Local
Schools	Schools in Mayotte	Educational staff and institutions	Local
Schools directors in Mayotte	Schools administration in Mayotte	Educational staff and institutions	Local
Schools in Japon	Schools in Japon	Other populations	International
Schools in Mayotte	Schools in Mayotte	Students and schoolers in Mayotte	Local
Schools in the Antilles	Schools in the Antilles	Other populations	International
Sciences et Vie newspaper	Sciences et Vie newspaper	Mass media and associated journalists	International
Scientific actors	Scientists studying this activity	Scientific research and monitoring (groups, publications and institutions)	Undefined
Scientific campaign	Scientific campaigns	Scientific research and monitoring (groups, publications and institutions)	National
Scientific campaign at sea	Scientific campaigns	Scientific research and monitoring (groups, publications and institutions)	National
Scientific campaign on land	Scientific campaigns	Scientific research and monitoring (groups, publications and institutions)	National
Scientific campaigns	Scientific campaigns	Scientific research and monitoring (groups, publications and institutions)	National
Scientific committee of REVOSIMA	REVOSIMA	Scientific research and monitoring (groups, publications and institutions)	National
Scientific community	Scientific community	Scientific research and monitoring (groups, publications and institutions)	International
Scientific experts	Scientists_undefined	Scientific research and monitoring (groups, publications and institutions)	National
Scientific experts on field	Scientists_undefined	Scientific research and monitoring (groups, publications and institutions)	National
Scientific high schoolers in Mayotte	Schoolers in Mayotte	Students and schoolers in Mayotte	Local
Scientific journals	Scientific journals	Scientific research and monitoring (groups, publications and institutions)	International
Scientific leaders	Scientific campaigns leaders	Scientific research and monitoring (groups, publications and institutions)	National
Scientific mission	Scientific campaigns	Scientific research and monitoring (groups, publications and institutions)	National
Scientific mission at sea	Scientific campaigns	Scientific research and monitoring (groups, publications and institutions)	National
Scientific mission leaders	Scientific campaigns leaders	Scientific research and monitoring (groups, publications and institutions)	National
Scientific mission on land	Scientific campaigns	Scientific research and monitoring (groups, publications and institutions)	National
Scientific mission on Marion Dufresne	Scientific campaigns	Scientific research and monitoring (groups, publications and institutions)	National
Scientific mission_MAYOBS 1	Scientific campaign MAYOBS 1	Scientific research and monitoring (groups, publications and institutions)	National
Scientific missions at sea	Scientific campaigns	Scientific research and monitoring (groups, publications and institutions)	National
Scientific publication	Scientific studies	Scientific research and monitoring (groups, publications and institutions)	International
Scientific publications worldwide	Scientific studies	Scientific research and monitoring (groups, publications and institutions)	International
Scientific schoolers in Lycée des Lumières	Schoolers in Mayotte	Students and schoolers in Mayotte	Local
Scientific schoolers in Mayotte	Schoolers in Mayotte	Students and schoolers in Mayotte	Local
Scientific team from BRGM	BRGM	Scientific research and monitoring (groups, publications and institutions)	National
Scientific team from IPGP	IPGP	Scientific research and monitoring (groups, publications and institutions)	National
Scientific team in SISMAORE	Scientific campaign SISMAORE	Scientific research and monitoring (groups, publications and institutions)	National
Scientific team in MAYOBS	Scientific campaigns MAYOBS	Scientific research and monitoring (groups, publications and institutions)	National
Scientific team in MAYOBS 1	Scientific campaign MAYOBS 1	Scientific research and monitoring (groups, publications and institutions)	National
Scientific team in MAYOBS 4	Scientific campaign MAYOBS 4	Scientific research and monitoring (groups, publications and institutions)	National
Scientific teams onboard	Scientific campaigns	Scientific research and monitoring (groups, publications and institutions)	National
Scientists and technicians from BRGM	BRGM	Scientific research and monitoring (groups, publications and institutions)	National
Scientists and technicians from CNRS	CNRS	Scientific research and monitoring (groups, publications and institutions)	National
Scientists and technicians from IFREMER	IFREMER	Scientific research and monitoring (groups, publications and institutions)	National
Scientists and technicians from IPGP	IPGP	Scientific research and monitoring (groups, publications and institutions)	National
Scientists from BRGM	BRGM	Scientific research and monitoring (groups, publications and institutions)	Undefined
Scientists from CNRS	CNRS	Scientific research and monitoring (groups, publications and institutions)	National
Scientists from GIM	Macroseismic Intervention Group	Scientific research and monitoring (groups, publications and institutions)	National
Scientists from IFREMER	IFREMER	Scientific research and monitoring (groups, publications and institutions)	National
Scientists from IPGP	IPGP	Scientific research and monitoring (groups, publications and institutions)	National
Scientists from mainland France	Scientists from mainland France	Scientific research and monitoring (groups, publications and institutions)	National
Scientists from REVOSIMA	REVOSIMA	Scientific research and monitoring (groups, publications and institutions)	National
Scientists from several countries	International scientists	Scientific research and monitoring (groups, publications and institutions)	International
Scientists in general	Scientific community	Scientific research and monitoring (groups, publications and institutions)	Undefined
Scientists in GEOFLAMME	Scientific campaign GEOFLAMME	Scientific research and monitoring (groups, publications and institutions)	National
Scientists in MAYOBS	Scientific campaigns MAYOBS	Scientific research and monitoring (groups, publications and institutions)	National
Scientists in MAYOBS 13	Scientists in MAYOBS 13	Scientific research and monitoring (groups, publications and institutions)	National
Scientists in MAYOBS 15	Scientific campaign MAYOBS 15	Scientific research and monitoring (groups, publications and institutions)	National
Scientists in MAYOBS 2	Scientific campaign MAYOBS 2	Scientific research and monitoring (groups, publications and institutions)	National
Scientists in MAYOBS 3	Scientific campaign MAYOBS 3	Scientific research and monitoring (groups, publications and institutions)	National
Scientists in MAYOBS 4	Scientific campaign MAYOBS 4	Scientific research and monitoring (groups, publications and institutions)	National
Scientists in MAYOBS campaigns	Scientific campaigns MAYOBS	Scientific research and monitoring (groups, publications and institutions)	National
Scientists in REFMAORE	Scientific campaign REFMAORE	Scientific research and monitoring (groups, publications and institutions)	National
Scientists in SISMAORE	Scientific campaign SISMAORE	Scientific research and monitoring (groups, publications and institutions)	National
Scientists in TelluS Mayotte	Scientific campaign TelluS Mayotte	Scientific research and monitoring (groups, publications and institutions)	National
Scientists in the Volcano Week	Scientists in the Volcano Week	Scientific research and monitoring (groups, publications and institutions)	National
Scientists involved	Scientists_undefined	Scientific research and monitoring (groups, publications and institutions)	Undefined
Scientists visiting a school in Mayotte	Scientists visiting a school in Mayotte	Scientific research and monitoring (groups, publications and institutions)
Scientists on Marion Dufresne	Scientific campaigns	Scientific research and monitoring (groups, publications and institutions)	National
Scientists onboard	Scientific campaigns	Scientific research and monitoring (groups, publications and institutions)	National
Scientists visiting a high school in Tsararano	Scientists visiting a school in Mayotte	Scientific research and monitoring (groups, publications and institutions)	National
Scientists visiting Lycée des Lumières	Scientists visiting a school in Mayotte	Scientific research and monitoring (groups, publications and institutions)	National
Scientists working on Mayotte	Scientists studying this activity	Scientific research and monitoring (groups, publications and institutions)	Undefined
Scientists involved in the campaigns	Scientists involved in the campaigns	Scientific research and monitoring (groups, publications and institutions)	Undefined
Scientists working on the warning process	Scientists working on the warning process	Scientific research and monitoring (groups, publications and institutions)	Undefined
Scientists involved in monitoring	Scientists involved in monitoring	Scientific research and monitoring (groups, publications and institutions)	National
Scientists_undefined	Scientists_undefined	Scientific research and monitoring (groups, publications and institutions)	Undefined
Screenwriter Bruno Sevaistre	Screenwriter Bruno Sevaistre	Mass media and associated journalists	National
Sea workers	Sea workers	At-risk populations in Mayotte	Local
Sébastien Jaffrot	Sébastien Jaffrot	Scientific research and monitoring (named individuals)	National
Secretary General for Investment	Secretary General for Investment	French political institutions	National
Seismologists	Geoscientists_undefined	Scientific research and monitoring (groups, publications and institutions)	Undefined
Seismologists from REVOSIMA	REVOSIMA	Scientific research and monitoring (groups, publications and institutions)	National
Seismologists in the interdepartmental expertise mission in June 2018	Interdepartmental mission in June 2018	Scientific research and monitoring (groups, publications and institutions)	National
Seismologists_undefined	Geoscientists_undefined	Scientific research and monitoring (groups, publications and institutions)	Undefined
Senate	French Senate	French political institutions	National
Several hundred of inhabitants in Mayotte	Populations in Mayotte	At-risk populations in Mayotte	Local
Several inhabitants in Mayotte	Populations in Mayotte	At-risk populations in Mayotte	Local
Several Internet users	Internet users	Other populations	Local
Several magnetotelluric studies	Scientific studies	Scientific research and monitoring (groups, publications and institutions)	International
Several ministries	French ministries	French political institutions	National
Several missions on land	Scientific campaigns	Scientific research and monitoring (groups, publications and institutions)	National
Several municipalities in Mayotte	Municipalities in Mayotte	Elected local officials	Local
Several scientific missions on land and offshore	Scientific campaigns	Scientific research and monitoring (groups, publications and institutions)	National
Several scientists	Scientists_undefined	Scientific research and monitoring (groups, publications and institutions)	National
Several scientists involved in multiple studies on the Mayotte volcano	REVOSIMA	Scientific research and monitoring (groups, publications and institutions)	Undefined
Several sociologists	Sociologists	Scientific research and monitoring (groups, publications and institutions)	International
Several STTM members	STTM members	Civil society, private sector and NGOs	Local
SGTM society	Private enterprises in Mayotte	Civil society, private sector and NGOs	Local
Shipowner of Marion Dufresne	Shipowner of Marion Dufresne	Civil society, private sector and NGOs	National
SHOM	French Navy Hydrographic and Oceanographic Service	Scientific research and monitoring (groups, publications and institutions)	National
SIDEVAM	SIDEVAM (inter-municipal union for the elimination and recovery of waste in Mayotte)	Public and para-public services to the population (institutions and members)	Local
Simon Besançon	Simon Besançon	Scientific research and monitoring (named individuals)	National
Singer and songwriter Diho	Singer and songwriter Diho	Local identified personalities	Local
SISMAORE	Scientific campaign SISMAORE	Scientific research and monitoring (groups, publications and institutions)	National
SISMAORE crew	Crew of SISMAORE	Scientific research and monitoring (groups, publications and institutions)	National
Social medias	Social medias	Social medias/Internet	International
Social medias of Government	Social medias of Government	Social medias/Internet	Local
Social medias of Ministry of Interior	Social medias of Ministry of Interior	Social medias/Internet	National
Sociological study	Scientific studies	Scientific research and monitoring (groups, publications and institutions)	International
Some agents of the departmental council	Agents of the departmental council	Public and para-public services to the population (institutions and members)	Local
Some campaigns such as those to be conducted by Antea	Scientific campaigns	Scientific research and monitoring (groups, publications and institutions)	National
Some inhabitants in Mayotte	Populations in Mayotte	At-risk populations in Mayotte	Local
Some of the National Education staff in Mayotte	Educational staff members in Mayotte	Educational staff and institutions	Local
Some physicians	Health services	Public and para-public services to the population (institutions and members)	Local
Some religious leaders in Mayotte	Religious leaders in Mayotte	Civil society, private sector and NGOs	Local
Some teachers in Mayotte	Teachers in Mayotte	Educational staff and institutions	Local
Speakers on River maintenance and restoration plan	Speakers on River maintenance and restoration plan	Public and para-public services to the population (institutions and members)	National
Special mission for civil protection	Missions for civil protection	Risks and crisis management actors	National
Staff educational members in psychological difficulty	Educational staff members in Mayotte	Educational staff and institutions	Local
Staff in Préfecture of Mayotte	Staff in Préfecture of Mayotte	Risks and crisis management actors	Local
Staff of the departmental council	Populations in Mayotte	At-risk populations in Mayotte	Local
Maritime transport service's staff	Maritime transport service's staff	At-risk populations in Mayotte	Local
State services	State services	Risks and crisis management actors	National
State services in Mayotte	State services in Mayotte	Risks and crisis management actors	Local
Statement from REVOSIMA	REVOSIMA	Scientific research and monitoring (groups, publications and institutions)	National
Stephan Jorry	Stephan Jorry	Scientific research and monitoring (named individuals)	National
Stephan Jorry's team	Associates of Stephan Jorry	Scientific research and monitoring (groups, publications and institutions)	National
Stéphane Ritter	Stéphane Ritter	Risks and crisis management actors	National
STTM	STTM members	Civil society, private sector and NGOs	Local
STTM administrators	STTM members	Civil society, private sector and NGOs	Local
STTM members	STTM members	Civil society, private sector and NGOs	Local
STTM spokeperson	STTM members	Civil society, private sector and NGOs	Local
STTM spokepersons	STTM members	Civil society, private sector and NGOs	Local
Students from the academy of Mayotte	Schoolers in Mayotte	Students and schoolers in Mayotte	Local
SUALA	SUALA	Mass media and associated journalists	Local
Sud-Ouest newspaper	Sud-Ouest newspaper	Mass media and associated journalists	National
SVT educational inspector at the rectorat de Mayotte	Educational staff members in Mayotte	Educational staff and institutions	Local
SVT teachers in Lycée des Lumières	SVT teachers in Mayotte	Educational staff and institutions	Local
SVT teachers on the island	SVT teachers in Mayotte	Educational staff and institutions	Local
Sylvain Bermell	Sylvain Bermell	Scientific research and monitoring (named individuals)	National
Sylvie Leroy	Sylvie Leroy	Scientific research and monitoring (named individuals)	National
Syndicats	Syndicats	Civil society, private sector and NGOs	Local
TAAF	TAAF	Scientific research and monitoring (groups, publications and institutions)	National
Tanafou political party	Tanafou political party	Elected local officials	Local
Task force for the air bridge with La Reunion	Task force for the air bridge with La Reunion	Risks and crisis management actors	Regional
Teacher onboard	Teachers in the SISMAORE campaign	Educational staff and institutions	Local
Teachers in Lycée des Lumières	Teachers in Mayotte	Educational staff and institutions	Local
Teachers in Mayotte	Teachers in Mayotte	Educational staff and institutions	Local
Teachers onboard	Teachers in the SISMAORE campaign	Educational staff and institutions	Local
Teaching staff in Mayotte	Teachers in Mayotte	Educational staff and institutions	Local
Team from OVPF	OVPF	Scientific research and monitoring (groups, publications and institutions)	Regional
Teams for civil protection	Teams for civil protection	Risks and crisis management actors	National
Teams from IFREMER	IFREMER	Scientific research and monitoring (groups, publications and institutions)	National
Scientific team in MAYOBS	Scientific campaigns MAYOBS	Scientific research and monitoring (groups, publications and institutions)	National
Teams from OVPF	OVPF	Scientific research and monitoring (groups, publications and institutions)	Regional
Technical control office	Technical control office	Civil society, private sector and NGOs	Local
Technical director of the company Titanobel	Technical director of the company Titanobel	Civil society, private sector and NGOs	National
Technical services in the commune of Acoua	Commune of Acoua	Public and para-public services to the population (institutions and members)	Local
Technician scientists onboard	Scientific campaigns	Scientific research and monitoring (groups, publications and institutions)	National
Technicians from IPGP	IPGP	Scientific research and monitoring (groups, publications and institutions)	National
TelluS Mayotte	Scientific campaign TelluS Mayotte	Scientific research and monitoring (groups, publications and institutions)	National
TelluS Mayotte campaign	Scientific campaign TelluS Mayotte	Scientific research and monitoring (groups, publications and institutions)	National
TelluS Mayotte volcanology campaign	Scientific campaign TelluS Mayotte	Scientific research and monitoring (groups, publications and institutions)	National
Territorial authorities	Territorial authorities	Risks and crisis management actors	Local
The 9-days scientific campaign	Scientific campaigns	Scientific research and monitoring (groups, publications and institutions)	National
The airborn assets	Airborn assets	Civil society, private sector and NGOs	Regional
The armed forces in the southern Indian Ocean zone	Armed forces in the southern Indian Ocean zone	Risks and crisis management actors	Regional
The Comorian community in La Reunion	Comorian community in La Reunion	Other populations	Regional
The confined of Mayotte	Populations in Mayotte	At-risk populations in Mayotte	Local
The demining unit	Demining unit	Risks and crisis management actors	Local
The departmental service of territorial intelligence	Departmental service of territorial intelligence	Public and para-public services to the population (institutions and members)	Local
The entire French oceanographic fleet	French oceanographic fleet	Scientific research and monitoring (groups, publications and institutions)	National
The Express newspaper in Maurice	Express newspaper in Maurice	Mass media and associated journalists	Regional
Firemen	Firemen	Risks and crisis management actors	Local
The first campaign named MAYOBS 13-1	Scientific campaign MAYOBS 13	Scientific research and monitoring (groups, publications and institutions)	National
The first scientists who came to the island	First scientists who came to the island	Scientific research and monitoring (groups, publications and institutions)	National
The French association of earthquake engineering	French association of earthquake engineering	Scientific research and monitoring (groups, publications and institutions)	National
The French Department in the Indian Ocean	Department and populations of Mayotte	Elected local officials	Regional
The French Navy	French army	Public and para-public services to the population (institutions and members)	National
The French oceanographic fleet	French oceanographic fleet	Scientific research and monitoring (groups, publications and institutions)	National
The French scientists	French scientific community	Scientific research and monitoring (groups, publications and institutions)	National
The inhabitants of the slums located in the mangrove of Iloni	Populations in Mayotte	At-risk populations in Mayotte	Local
The interim management of the departemental council	Department of Mayotte	Elected local officials	Local
The mission of seismologists	Scientific campaigns	Scientific research and monitoring (groups, publications and institutions)	National
The oceanographic campaign with the Marion Dufresne	Scientific campaigns	Scientific research and monitoring (groups, publications and institutions)	National
The participants in the mission	Scientific campaigns	Scientific research and monitoring (groups, publications and institutions)	National
The population in mosques	Populations in Mayotte	At-risk populations in Mayotte	Local
The prefecture's Frequently Asked Questions	Préfecture of Mayotte	Risks and crisis management actors	Local
The press release from the Ministries of Overseas Territories Ecological Transition Interior and Research	Interministerial statement	French political institutions	National
The public	Populations in Mayotte	At-risk populations in Mayotte	Local
The Red Cross	Red Cross	Civil society, private sector and NGOs	Regional
The Red Cross’ volunteers	Red Cross	Civil society, private sector and NGOs	Local
The relay village	Populations in Mayotte	At-risk populations in Mayotte	Local
Scientific teams in MAYOBS	Scientists in MAYOBS	Scientific research and monitoring (groups, publications and institutions)	National
The scholars	Scientists_undefined	Scientific research and monitoring (groups, publications and institutions)	Undefined
The scientific delegation	Scientists studying this activity	Scientific research and monitoring (groups, publications and institutions)	National
The SFR trade	Private enterprises in Mayotte	Civil society, private sector and NGOs	Local
The SFR trade staff	Private enterprises in Mayotte	Civil society, private sector and NGOs	Local
Scientific team in SISMAORE	Scientific campaign SISMAORE	Scientific research and monitoring (groups, publications and institutions)	National
Scientific teams in MAYOBS	Scientists in MAYOBS	Scientific research and monitoring (groups, publications and institutions)	National
The youngest	Children in Mayotte	At-risk populations in Mayotte	Local
The youngest department in France	Department and populations of Mayotte	At-risk populations in Mayotte	Local
The youth from Mayotte	Children in Mayotte	At-risk populations in Mayotte	Local
The Zone and Civil Protection Staff of the Indian Ocean	Zone and Civil Protection Staff of the Indian Ocean	Risks and crisis management actors	Regional
The Zone Staff of the Indian Ocean	Zone and Civil Protection Staff of the Indian Ocean	Risks and crisis management actors	Regional
This campaign in full containment	Scientific campaign MAYOBS 13	Scientific research and monitoring (groups, publications and institutions)	National
Those operations at sea	Scientific campaigns	Scientific research and monitoring (groups, publications and institutions)	National
Those researchers	Scientists_undefined	Scientific research and monitoring (groups, publications and institutions)	National
Those scientific missions	Scientific campaigns	Scientific research and monitoring (groups, publications and institutions)	National
Those scientists	Scientists_undefined	Scientific research and monitoring (groups, publications and institutions)	National
Those two scientific campaigns	Scientific campaigns	Scientific research and monitoring (groups, publications and institutions)	National
Thousands of children	Children in Mayotte	At-risk populations in Mayotte	Local
TV	TV	Mass media and associated journalists	Local
Twitter	Twitter	Social medias/Internet	International
Two families in Tsimkoura	Populations in Mayotte	At-risk populations in Mayotte	Local
Two ingeniors from IPGP	IPGP	Scientific research and monitoring (groups, publications and institutions)	National
Two monitoring campaigns at sea	Scientific campaigns	Scientific research and monitoring (groups, publications and institutions)	National
Two municipalities targeted to install Raspberry Shake stations	Two municipalities targeted to install Raspberry Shake stations	Elected local officials	Local
Two people denied from onboarding	STTM members	At-risk populations in Mayotte	Local
Two researchers in sociology	Sociologists	Scientific research and monitoring (groups, publications and institutions)	International
Two scientists in the TelluS Mayotte volcanology campaign	Scientific campaign TelluS Mayotte	Scientific research and monitoring (groups, publications and institutions)	National
Two teams of The Red Cross	Red Cross	Civil society, private sector and NGOs	Local
UCA	University of Clermont Auvergne	Scientific research and monitoring (groups, publications and institutions)	National
UDAF	UDAF (Departmental Union of Family Associations)	Public and para-public services to the population (institutions and members)	Local
UNAF	UNAF (National Union of Family Associations)	Public and para-public services to the population (institutions and members)	National
UNESCO	UNESCO	Foreign states, communities and personalities	International
Unidentified	Unidentified	Divers/Undefined	Undefined
Union CGT Educ’action	Union CGT Educ’action	Civil society, private sector and NGOs	Local
Union of Comoros	Union of Comoros	Foreign states, communities and personalities	Regional
Universities in Germany	Universities in Germany	Scientific research and monitoring (groups, publications and institutions)	International
Universities in Italia	Universities in Italia	Scientific research and monitoring (groups, publications and institutions)	International
Universities in Switzerland	Universities in Switzerland	Scientific research and monitoring (groups, publications and institutions)	International
University of Clermont Auvergne	University of Clermont Auvergne	Scientific research and monitoring (groups, publications and institutions)	National
University of La Reunion	University of La Reunion	Scientific research and monitoring (groups, publications and institutions)	Regional
University of La Rochelle	University of La Rochelle	Scientific research and monitoring (groups, publications and institutions)	National
University of Paris	University of Paris	Scientific research and monitoring (groups, publications and institutions)	National
University of Toulouse	University of Toulouse	Scientific research and monitoring (groups, publications and institutions)	National
Users of the maritime transport service	Populations in Mayotte	At-risk populations in Mayotte	Local
USGS	USGS	Scientific research and monitoring (groups, publications and institutions)	International
USGS catalog	USGS	Scientific research and monitoring (groups, publications and institutions)	International
Vice-President of the departmental council	Vice-President of the Departmental Council	Elected local officials	Local
Vice-President of the departmental council Issa Abdou	Vice-President of the Departmental Council	Elected local officials	Local
Vice-rector of Mayotte	Vice-rector of Mayotte	Educational staff and institutions	Local
Vice-rectorate of Mayotte	Rectorate of Mayotte	Educational staff and institutions	Local
Vice-rectorate's partners	Rectorate's partners	Educational staff and institutions	Local
Victims in Mayotte	Populations in Mayotte	At-risk populations in Mayotte	Local
Village fishermen's committees COVIPEM	Village fishermen's committees COVIPEM	Civil society, private sector and NGOs	Local
Villagers in Mayotte	Populations in Mayotte	At-risk populations in Mayotte	Local
Villagers of Iloni living on the coast	Populations in Mayotte	At-risk populations in Mayotte	Local
Villages in Mayotte	Populations in Mayotte	At-risk populations in Mayotte	Local
Virginie Duvat	Virginie Duvat	Scientific research and monitoring (named individuals)	National
Volunteer scientists in REVOSIMA	REVOSIMA	Scientific research and monitoring (groups, publications and institutions)	National
Wayne Crawford	Wayne Crawford	Scientific research and monitoring (named individuals)	National
Website of BCSF	Website of BCSF	Social medias/Internet	National
Website of BRGM	Website of BRGM	Social medias/Internet	National
Website of BRGM in Mayotte	Website of BRGM in Mayotte	Social medias/Internet	Local
Website of EMSC	Website of EMSC	Social medias/Internet	International
Website of France Seisme	Website of France Seisme	Social medias/Internet	National
Website of IFREMER	Website of IFREMER	Social medias/Internet	National
Website of international scientific institutes	Website of international scientific institutes	Social medias/Internet	International
Website of IPGP	Website of IPGP	Social medias/Internet	National
Website of Journal of Mayotte	Website of Journal of Mayotte	Social medias/Internet	Local
Website of maps4news	Website of maps4news	Social medias/Internet	International
Website of Ministry of Interior	Website of Ministry of the Interior	Social medias/Internet	National
Website of Préfecture of Mayotte	Website of Préfecture of Mayotte	Social medias/Internet	Local
Website of the Government	Website of the Government	Social medias/Internet	National
Website of the SISMAORE blog	Website of the SISMAORE blog	Social medias/Internet	National
Website of USGS	Website of USGS	Social medias/Internet	International
Website of Vice-rectorate of Mayotte	Website of Rectorate of Mayotte	Social medias/Internet	Local
Wikipedia	Internet	Social medias/Internet	International
William Gayout	William Gayout	Risks and crisis management actors	National
Witnesses in Mayotte	Populations in Mayotte	At-risk populations in Mayotte	Local
Witnesses in Nosy Be	Witnesses in Nosy Be	Other populations	Regional
Worldwide scientists	Scientific community	Scientific research and monitoring (groups, publications and institutions)	International
Worldwide scientists teams	Scientific community	Scientific research and monitoring (groups, publications and institutions)	International
Worried inhabitants	Populations in Mayotte	At-risk populations in Mayotte	Local
Writer Abdou Baco	Writer Abdou Baco	Local identified personalities	Local
Writer Ambass Ridjali	Writer Ambass Ridjali	Local identified personalities	Local
Ylang ship	Ylang ship from SGTM enterprise	Scientific research and monitoring (groups, publications and institutions)	Local
Young people in Dembéni	Populations in Mayotte	At-risk populations in Mayotte	Local
Zakweli	Zakweli	Mass media and associated journalists	Local
Zone and civil protection staff of the Indian Ocean	Zone and Civil Protection Staff of the Indian Ocean	Risks and crisis management actors	Regional
Communes of Mayotte	Communes of Mayotte	Public and para-public services to the population (institutions and members)	Local
Crisis unit in Prefecture	Crisis unit in Prefecture	Risks and crisis management actors	Local
