# Supplementary material for: Quantitative analysis of actors' mention in press coverage of a seismo-volcanic activity in the French overseas
Source: Copernicus journal article supplement (doi:10.5194/egusphere-2024-1358), 2024-06-14
Supplement: Supplementary file [file egusphere-2024-1358-AC3-supplement.pdf]

Dear Reviewer 1,

We would like to express our sincere thanks for your positive feedback and for the constructive comments you provided on our manuscript. We were pleased to read that you found the analysis both well-discussed and fair. We have carefully addressed all the editorial and technical points you raised.

In response to your comments, the entire manuscript has undergone thorough proofreading to improve English grammar and syntax. Furthermore, all the figures you mentioned (Figures 1, 5-11) have been remade in higher resolution with enlarged font sizes, wherever technically feasible, to enhance readability.

With regard to your specific comment on Figure 5, your observation aligned with a similar concern raised by Reviewer 2, and we have taken both sets of feedback into account in revising this Figure 5. The font size has been reduced slightly and label positions have been adjusted to minimise overlap. We agree that the network is visually dense. This visual complexity is intentional and constitutes a key finding of our analysis. The initial 'illegibility' of the figure is meant to reflect the multitude of actors and the unstructured, "hairball" nature of the communication network during the early stages of the crisis. This visual evidence supports our argument about the challenges of communication and coordination. This visual feature reinforces our argument concerning the difficulties in communication and coordination. To clarify this intention, we have added an explanatory sentence to the figure caption and have highlighted the main actors more clearly within the diagram.

Please find our detailed, point-by-point responses to your suggestions below.

Sincerely,

The Authors

### **Point-by-point response**

- Line 114, "eruptive activity at sea": please consider revising to "submarine eruptive activity". => [Done](#)
- Line 114, "a newly born": Please use a reference to confirm that it is indeed new and that it is not a preexisting that was simply discovered in 2019. => [Done \(Feuillet et al., 2021\)](#).
- Line 115, "uncertainties were really high": uncertainties with respect to what? The location of the volcano? The origin of the felt earthquakes? The duration of the crisis? Please specify if there is a size or a magnitude (and units of measurement or magnitude units) used to describe the uncertainty. => [Uncertainties were both instrumental and epistemic, as the geodynamics of this region were not well constrained and the sensor network was poor. It was therefore difficult to determine both the origin of this seismic activity and the duration of the crisis. We have added a few elements to the text to clarify this :](#)

“From a scientific perspective, uncertainties were exceptionally high, especially in the first months of the seismic crisis, due to scarce knowledge of the geodynamical context in the area and a poor monitoring network (Saurel et al., 2021; Bertil et al., 2021; Feuillet et al., 2021). The recorded signals were poorly constrained in terms of location and magnitude and remained difficult to explain in this region. The volcanic hypothesis to explain the origin of the seismic activity did not emerge until several months later, in October 2018, and was not confirmed until May 2019.”

- Line 117, “poor instrumental network”: Poor in what sense? Not dense enough? Bad resolution in time, bad bit rate, something else? => It mainly concerned the spatial distribution and density of the sensors. The type of sensor was also at issue, since there were no broadband frequency stations on site during the first few weeks of the seismic crisis. We have added a few details to characterise this situation in the main text of the article. See corrected paragraph above.
- Line 117, “instrumental network”: revise to “network of sensors” => Done
- Line 119, “to appraise the situation”: Please consider revising to “to have situational awareness”. => Done
- Line 126, “seisms”: replace with “earthquakes”. => Done
- Line 127, “km from the coast”: replace with “off the coast”. => Done
- Lines 128-129, “on Petite Terre island”: replace with “on the Petite Terre island, Mayotte's second-largest island, east of the largest island and closer to the Fani Maore volcano”. => Done
- Line 192, Figure 1: The image resolution is too low, which makes the text hard to read, which is already hard to read because of the small font size. Please consider improving the figure while taking into account any editorial requirements. => Resolution was improved, and font size was enlarged.
- Line 207, “a double-reading method”: Please give a short description of this method, perhaps a reference too. => Our formulation is actually not adequate here since this way of proceeding can not be labelled as a method. Thus, we propose a reformulation : “To study the press coverage of different categories of “actors”, a double-reading process was employed. Two researchers independently reviewed the articles to identify each actor or group of actors mentioned, even when they were identified by professional status, by nicknames, etc.”
- Line 214, “20190507\_JDM\_001”: It seems that this needs to be deleted. => This was an example among articles selected in our corpus. We have reworded the sentence to quote the reference correctly :  
  
“Nathalie Feuillet, a researcher, was wrongly affiliated with IFREMER in some articles, such as in an article published in the Journal de Mayotte on the 7th of May 2019”
- Line 216, “its exact denomination(s)”: Incorrect English; replace with “their exact denominations”.=> Done

- Line 225, Table 1; Line 438, Figure 5: “sismo-volcanic”: typos; replace with “seismo-volcanic” => Done

- Line 258, “Louvain clustering method”; Line 260, “network diagrams plotting citation links” : cite any code or software used to apply this method and to plot the diagrams or declare that you used an in-house code (specify the programming language you used in this case, and cite it). => We thank the reviewer for their careful reading and insightful comments. We would like to clarify that the mention of global network indicators and the Louvain clustering method, which may have appeared in earlier drafts, was already removed from the version submitted for review. However, we recognize that the wording of the paragraph may have caused confusion, and we sincerely apologize for that. Following the reviewer’s helpful suggestion, we have revised the paragraph to explicitly state the use of the igraph package in R for computing node-level centrality indices. The updated paragraph now reads:

“We study the system of actors depicted by the network of citations to better understand the relationships between individual actors, actor categories and their evolutions. This is accomplished using node-level centrality indices, including in-degree, out-degree, and betweenness centrality, computed with the igraph package in R. Network diagrams plot citation links with arrows, and the size of the nodes, as well as the font size of generic names, are weighted according to their degree, representing the number of direct connections each node has within the citation network. Unidentified actors are removed from the graphs to avoid generating false co-citation relationship structures.”

- Lines 253; 309, : replace “vs” with “versus” throughout the manuscript, e.g.: “speech vs simple” revise to “speech versus simple”; “mention vs indirect mention” to “mention versus indirect mention”, etc.. => Done
- Line 367, “achieving a PhD in geography at Paul Valéry Montpellier 3 University”: Incorrect English, revise to “holding a PhD in geography from the Paul Valéry Montpellier 3 University”. => He is actually a PhD candidate. We have made the correction :

“Saïd Hachim, a geographer from Mayotte (Mahoran) who works at the Departmental Council of Mayotte and is also a PhD candidate in geography at Paul Valéry Montpellier 3 University in mainland France”

- Line 374, “BRGM (French geological survey BRGM)”: revise to “BRGM (French geological survey)”. => Done
- Line 378, “representatives, ect)”: replace with “representatives, etc.)”.=> Done
- Lines 395-396, “oceanographic campaigns (MayObs 1 and 2)”: please add a reference. => Done
- Line 398, Figure 3: Please consider using colorblind friendly colors. => Thank you for this important remark. In response, we revised the color palette of Figure 3 using a pair of contrasting colors — #E66100 and #5D3A9B — which maintain their contrast for individuals with color vision deficiencies.

- Lines 402-403, “presented in green”, “presented in orange”: revise to “annotated with green/orange labels”. => [Done](#)
- Line 417, “Groupe d’Intervention Macrosismique”: please give a short description of what this is, and a reference as well. => [We reformulated as followed and moved this paragraph into the discussion :](#)

“The municipality of Chirongui stands out here, probably because it hosted the delegation of specialists in civil security and natural risks dispatched by two ministries (Ministry of Ecology and Ministry of the Interior) (Journal de Mayotte, the 6th of June 2018). This event served as an entry point for the presentation of the group in the local press. Furthermore, the mayor at the time remained in office from 2008 to 2020, and her team appears to have been particularly active and well integrated into the local community.”

- Line 436, Figure 5: Not very helpful, too dense network, hard to see the connections. => [We refer you to the introductory remarks in our response letter.](#)
- Line 454, “mainland France and”: add a serial comma “mainland France, and”. => [Done](#)
- Line 456, “Macroseismic Intervention Group”: Here it is mentioned in English; elsewhere the manuscript used its French name. Please use the same names consistently through the text. => [Done](#)
- Line 489, “VLP earthquake”: Please write it out in full: “very-long-period earthquake”. => [Done](#)
- Line 491, “Twitter network”: Delete the space: “Twitter network”. => [Done](#)
- Line 586, “several limitations in our study”: Please consider briefly discussing all the limitations of this study that you are aware of. => [Actually, we detailed those limitations in the same paragraph. We agree that this formulation is not appropriate as it suggests more limitations so we propose the following :](#)

“Despite the focus on newspaper representations rather than those among populations, and the use of articles from six non-specialist French-language newspapers, this study provides a comprehensive insight into media narratives during the seismic-volcanic crisis in Mayotte from May 2018 to May 2021.”

- Line 628, “relatively minimal material and human damage (only three lightly injured and cracked buildings in Mayotte)”: Please revise to “the light building damage (cracks), and the small number of people affected (three lightly injured).” => [Done](#)
- Line 636, “However, here despite”: please revise to “However, here, despite” => [Done](#)
