# Supplementary material for: Quantitative analysis of actors' mention in press coverage of a seismo-volcanic activity in the French overseas
Source: Copernicus journal article supplement (doi:10.5194/egusphere-2024-1358), 2024-06-14
Supplement: Supplementary file [file egusphere-2024-1358-RC2-supplement.pdf]

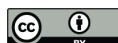

# Quantitative analysis of actors' mention in press coverage of a seismo-volcanic activity in the French overseas

Louise Le Vagueresse<sup>1</sup>, Marion Le Texier<sup>2</sup>, Maud H. Devès<sup>1,3</sup>

<sup>1</sup> Université Paris Cité, Institut de physique du globe de Paris, CNRS, F-75005 Paris, France

<sup>2</sup> Université Paris Cité, Centre de Recherche Psychanalyse Médecine et Société, CNRS, F-75006 Paris, France

<sup>3</sup> LAGAM, Laboratory for Geography and Territorial Planning in Montpellier, University Paul Valéry, Montpellier 3, France

Correspondence to: Louise Le Vagueresse ([levagueresse@ipgp.fr](mailto:levagueresse@ipgp.fr))

## Abstract

Media, especially the press, play a crucial role in shaping public understanding and representations during risk and crisis management, acting as intermediaries between various actors and the public. However, their framing of sources can introduce biases into representations. Limited analysis exists regarding how press coverage portrays relationships between crisis and risk management actors. Using Social Network Analysis, we map quotation networks in press coverage of a seismo-volcanic crisis in Mayotte, a French overseas department allowing us to: i) have an overview of the relationships between actors; ii) highlight unique aspects related to the context and media portrayal; iii) display underlying representations and levels of trust among interviewed actors and iv) visualises networks' dynamics over time. Analysis revealed variations in narrative approaches among newspapers, with some focusing on specific aspects. General results show that national authorities received more attention than local elected representatives, and scientific figures dominated reported speeches, while the population's perspective remained relatively passive despite their centrality to the quotation network. Identified individuals held significant positions, emphasising the importance of personal connection in communication and revealing a potential distrust toward political and scientific institutions. This underscores the need for proximity between sources and the community.

## 1. Introduction

Risk communication is a key component of disaster risk reduction (UNISDR, 2015). Implementing an efficient risk communication strategy is however not a trivial matter (e.g. Drabek, 1986; Mileti and Sorensen, 1990; Tierney, Lindell and Perry, 2001). There are many pitfalls: in the communication process between actors in charge of risk monitoring and management as well as in the process of public information sharing. It is particularly difficult when uncertainties are large, which is the case in crises related to volcanic hazards for instance (e.g. Barclay et al., 2008; Solana et al., 2017; Andreastuti et al., 2019). Mass media (newspapers, television, radio) play an important role with regards to public information (see Perry and Lindell 1989 p. 47-62 or Scanlon, 2007 for an overview). In crisis situations, they are identified as the main source of information for the public while searching for hazard-related information (Nazari et al., 2011; Poudel et al., 2015 ; Van Belle, 2015). It is especially the case for local and national media (Burkhart, 1991; Allan et al., 2000 ; Scanlon, 2007) and their participation is thus crucial for effective warning (Lindell et al., 2006). News reports are also closely followed by crisis management teams influencing official communication strategies (e.g.,

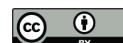

3

Lagadec, 1991; Lindell et al., 2006). They affect risk perception in the long term, notably by contributing to the circulation of “erroneous representations” about how individuals, groups or organisations behave during disasters (Coleman, 1993; Quarantelli, 2002; Wachinger et al., 2013; Van Belle, 2015).

As compared to other sources, newspapers, especially the daily press, are commonly seen as a more credible source of information because of their ability to provide in-depth analytic coverage (Quarantelli 2002, cited by Steelman et al. 2015). They are also widely relayed in other media or on social networks. The local press occupies a specific position to this respect, as local journalists are both interested parties and commentators of ongoing crises. The resulting coverage tends to be more regular and more detailed and it often provides the raw material for press agencies and, through them, for the other media (e.g. Nielsen, 2015 ~~on how local newspapers act as a “keystone media” despite having few readers~~ and Cagé, Hervé and Viard, 2017). Studies have also demonstrated the pivotal role played by local journalists as intermediaries between risk management authorities and populations while disseminating warning messages, conveying the community’s concerns and providing updates on the situation at the grassroots level (Scanlon, 2007). Newspapers’ coverage constitutes therefore an important issue for disaster research (see Harris et al. 2012; Camilleri et al., 2020; Calabrò et al., 2020; Le Texier et al., 2016 and Devès et al., 2019 ~~for application to seismic crises and~~ Devès et al., 2022b ~~for applications to volcanic crises~~).

However, the daily press, and the media in general, cannot be considered as simple vehicles for providing information. As recalled by Aylesworth-Spink (2017), they act as “a complex mediator with specific interests and motivations”. The way the media depict an event is neither exhaustive nor neutral. There are many factors influencing the final coverage: selection of topics (Pavelka, 2014), layout and design choices (e.g. Moirand, 2006; Schindler and Krämer, 2017; Billard and Moran, 2023), political ideology and editorial policy of the newspaper (e.g. Wang et al., 1992; Shoemaker and Reese, 1996), ~~access to sources and their respective social status~~ (Ploughman, 1997), ~~choices of contextualization~~ (Llasat et al., 2009; Cavaca et al., 2016; Carter et al. (2018) ~~in the context of Christchurch 2010 and 2011 and Kaikōura 2016 earthquakes~~). Day-to-day journalistic practices also play a role (e.g. Boykoff and Boykoff (2004) ~~about quoting sources on an equal footing on the example of global warming~~). The way journalists tend to cross the speeches of heterogeneous sources, whether important for depicting the variety of viewpoints, has been shown to “blur” messages (e.g. Lejeune, 2005, Léglise and Garric, 2012, and Devès et al., 2022a). These various factors can lead to conveying representations to the public that are sometimes very different from how authorities and scientists see the situation (Ploughman, 1995). They may also implicitly replicate common misconceptions (see Quarantelli, 1996) or reproduce asymmetrical power relationships between actors without really questioning them (~~local vs national authorities, experts vs lay public, etc., see~~ Valencio and Valencio (2018) ~~on the under-representation of at-risk communities’ vision about recovery solutions for their lives or~~ Devès et al. (2023) ~~on reproduction of asymmetrical power relationships in the media discourses in the context of a French over-sea seismo-volcanic crisis~~).

Examining press coverage provides insights into the pivotal moments and key actors perceived by journalists covering the event, who often serve as primary observers on the scene. The use of content and thematic analyses allows for the reconstruction of the sequence of events, mapping of actors’ networks (Hijmans, 1996), and identification of representations conveyed by the press toward at-risk communities. This is exemplified by studies like those conducted by Thistlethwaite & Henstra (2019) or Calabro et al. (2020). However, there is a limited number of studies analysing how



5

relationships between actors are portrayed in the press. Do these networks of interrelations, commonly connecting crisis management actors, experts, and populations, align with the envisaged distribution of roles during crisis management planning? If disparities exist, what insights do they provide?

Examining such interrelations can be accomplished by creating maps of quotation networks, representing how the actors themselves cite or reference each other in the press text (McLaren and Bruner, 2022). This method falls within Social Network Analysis (SNA), a widely employed approach in social and information sciences (Otte and Rousseau, 2002; Sapountzi et al., 2018). SNA utilises tools from network analysis and graph theory to investigate social structure and information circulation within networks of actors. Past studies utilising SNA or its derivatives in the realm of disaster risk research have shown interest in examining misinformation and the structuring of information networks in social media (e.g., Pourebrahim et al., 2015; Kim et al., 2018), or conducting a functional analysis of crisis management organisations (e.g., ~~refer to~~ Trias et al., 2019, ~~for governance~~, and Flecha et al., 2023, ~~for humanitarian aid~~). To our knowledge, there is a lack of studies utilising SNA on press data within the context of risk or crisis management. Yet, this is an important area of research, as this approach enables: i) gaining insights into the actual organisation of actors by providing a comprehensive view of all cited actors and their interactions, allowing the detection of communities (e.g. Park et al., 2015 and Williams et al., 2015); ii) identifying actors who are prominently featured, whether due to their perceived reliability, relevance in transmitting information on a subject, specific social role or accessibility to journalists, iii) examining the involvement of various actors and the evolution of this network over time (including the appearance and disappearance of actors and its effect on the structure of the network) and, iv) accessing a particular representation of actors, whether active or passive in media coverage. Here, we apply this method on a press coverage of a seismo-volcanic crisis in a French overseas department, Mayotte.

Before presenting our corpus (Section 3.1) and methods (Section 3.2), we briefly describe Mayotte geological and sociological contexts and explain why it is an interesting case study (Section 2). We then expose our findings (Section 4). Section 4.1 concentrates on the actors' mention frequency and form in varying newspapers (depending on publication rate). Section 4.2 focusses on whether actors' statements are displayed directly or through a third party, depending on the newspaper. Section 4.3 explores the positions of the actors mentioned in the chain of quotation. Section 4.4 is a comparison of the actor network structures during several specific "moments" of this media coverage. In sections 5.1 and 5.2, we discuss differences between the press representation of the actors network and the official organisation of risk and crisis management in France and its overseas territories. Eventually, we conclude on the interest and caveat of our approach and on future avenues of research.

## 2. Case study description

Devès et al. (2022a) provide a detailed description of Mayotte's geological context and the so-called "seismo-volcanic crisis" that began in Mayotte in May 2018. We settle here for reminding the main events and reviewing the latest scientific updates since knowledge evolves quite rapidly in the area due to ongoing significant research efforts.

The seismo-volcanic crisis began on the 10<sup>th</sup> of May 2018 with an unusual seismic activity (tens of felt earthquakes in the first month alone, with magnitude up to  $M_w$  5.9, see BSCF 2018). This seismic crisis turned out to be linked to a volcanic



7

eruptive activity at sea and a newly born volcanic edifice, named Fani Maore, was discovered one year later, in May 2019, at about 50 km off the eastern coast of Mayotte islands. From a scientific perspective, uncertainties were really high, especially in the first months of the seismic crisis due to scarce knowledge of the geodynamical context in the area and a poor instrumental network (Saurel et al., 2021; Bertil et al., 2021; Feuillet et al., 2021). This made public communication particularly difficult and led to the development of a “technicalist bias” with frequent, but technicalist and minimalist communication from institutions that did little to help the population to appraise the situation (Devès et al., 2022a). Indeed, there was an overall feeling of “lack of information” (Fallou et al., 2020) which led to the spread of numerous rumours to explain this phenomenon and to regular complaints from inhabitants and their representatives (see for instance the questions addressed to the government by a Member of Parliament for Mayotte Ali in 2018, as well as the opened letter sent to the authorities and scientists by a group of citizens in February 2019, Picard, 2019). At the time of writing, the eruption of the new submarine volcano Fani Maore has ceased and seismic activity is divided in two main clusters active since the end of June 2018 (according to Lemoine et al., 2020) at respectively 5 to 15 km and 30 to 40 km from coast (Feuillet et al., 2021; Saurel et al., 2021; Lavayssière et al., 2021). Most of them are volcano-tectonic seisms. Another sign of activity is the detection at 10 to 15 km from the coast of acoustic plumes associated with geochemical anomalies (22 sites observed in July 2022, MAYOBS 23) and possibly linked to the gas emissions monitored onland on Petite Terre island since prior to 2018. Hence, magmatic processes related to these observables are still pretty close to the island. As their uncertain evolution presents a significant hazard, it is currently being monitored by REVOSIMA (Mayotte Volcanological and Seismological Monitoring Network).

In addition to scientific uncertainties and the already mentioned ensuing difficulties in public information, other factors could also have undermined the relationship between actors. For instance, there is both a geographical and a cultural gap between scientists involved and the local populations since most of the former ones are based either in mainland France or in La Réunion island and do not have lots of occasions to exchange with Mayotte inhabitants. As detailed in Devès et al. (2022a), Mayotte is a multicultural archipelago with a dominant oral culture where about 37% of the population do not speak French (INSEE, 2017), which complicates risk prevention-communication from scientific institutions and authorities in charge. It is also a particularly vulnerable territory marked by poverty and important social inequality (Roinsard, 2014; INSEE, 2021). Since its recent departmentalization in 2011, it has been regularly shaken by social crisis, one ending just as the seismic swarm began (Roinsard, 2019; Mori, 2021). Finally, there seemed to be no living memory of seismic and volcanic phenomena in Mayotte implanted in the population. The last important earthquake was a magnitude  $M_L$  5.3 in 1993 (Bertil et al., 2021). This added to the underwater nature of this activity brought people to confusion, some of them going so far as to doubt the scientific explanations and the very existence of a volcano, even today (see testimonials in Devès et al., 2023). In this context, which brings together strong scientific uncertainties, social tensions and a multitude of players, we are seeking to identify in greater detail the obstacles and mechanisms that have hampered the information at each link of the communication chain.

~~To sum up,~~ Mayotte’s seismo-volcanic activity is an interesting case for this study because: i) although the seismic-volcanic phenomenon itself has been associated with moderate impacts, in the first years of activity, it triggered a social crisis that the risks managers themselves qualified as a “communication crisis” (see questions to the government, Ali (2018) where the deputy Ramlati Ali expresses in national assembly a need for information and an open letter sent by a citizens' group (Picard, 2019) and I which state services, elected officials and scientists were taken to task on this subject.

8

4

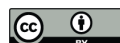

9

More details are exposed in Devès et al. 2022a and b, Fallou et al. 2020, Mori 2021 and 2022); ii) despite a large quantity of public information documents issued by scientists and the authorities (Devès et al., 2022a), the significant feeling of “lack of information” within the exposed population documented by Fallou et al., 2020 raises questions about the transmission chain of this information to the public; iii) risks are perceived mostly indirectly by at-risk populations, which poses specific challenges for public information (Skotnes, Hansen and Krovel, 2021); iv) there are large uncertainties, some of them still ongoing as we write; and eventually v) the activity is long-lasting allowing to study the evolution of a large coverage over time.

### 3. Method

#### 3.1 Corpus

We build on ~~from~~ two previous studies (Devès et al., 2022a ~~which focuses on public information processes and showed caveats in both scientific and state institutions communication~~ and Devès et al., 2023 ~~which illustrate how newspapers implicitly reproduce asymmetrical power relationships between actors without really questioning them (local vs national authorities, experts vs lay public, etc.)~~) to identify and compare occurrences of actors according to their role in the risk reduction network, the geographical scope of newspapers (local vs regional vs national) and whether there are significant differences between newspapers. We use the same corpus as Devès et al. (2022b) and Devès et al. (2023) that contain articles from six French-written daily newspapers published between the 10th of May 2018 and the 10th of May 2021. The methodology for creating this corpus is inspired by Le Texier et al. (2016) and Devès et al. (2019). We selected newspapers based on four criterias: 1) number of articles published on our case study, 2) broadness of readership, 3) spatial distribution of the readership along with the structural and cultural links existing between this zone and the study case area and 4) a targeted language (French in this study). Six French language daily newspapers were selected among 56 sources mentioning these events, addressing national (*Le Monde*, *Le Figaro*), regional (*L'Express de Madagascar*, *Le Journal de l'île de La Réunion*) and local readerships (*Le Journal de Mayotte* and *Mayotte la 1ère*); see Figure 1 and Part 1 in Supplementary Information. Articles were then collected with two types of sources : 1) Factiva and Europresse, two full-text press databases offering a selection of general and specialised of both paywalled or freely accessible newspapers with regional, national and international readerships, and 2) web archives, especially for local press articles which can not be found in those two databases. Factiva and Europresse databases are often used by scholars to study media coverage (Severo et al., 2015, Reboul-Touré 2021, Bernier et al. 2013).

The resulting database is composed of 358 articles published between May 10th 2018 and May 10st 202 thus covering the first three years of Mayotte's seismic-volcanic crisis. ~~We chose to limit this~~ database to May 2021, after the pictures taken underwater and graphical representations of the phenomenon began to be regularly broadcasted by these media ~~thus involving possible changes in the perception of the phenomenon by the readership~~. It is also when articles in the local press become less frequent. Within this database, 15 articles were excluded (see Supplementary Information) in this particular study as we wanted to work only on news items whose main subject is the seismo-volcanic activity. Therefore, the final database includes 343 articles and covers the first three years of the recent seismo-volcanic unrest near the archipelago of Mayotte.

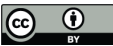

11

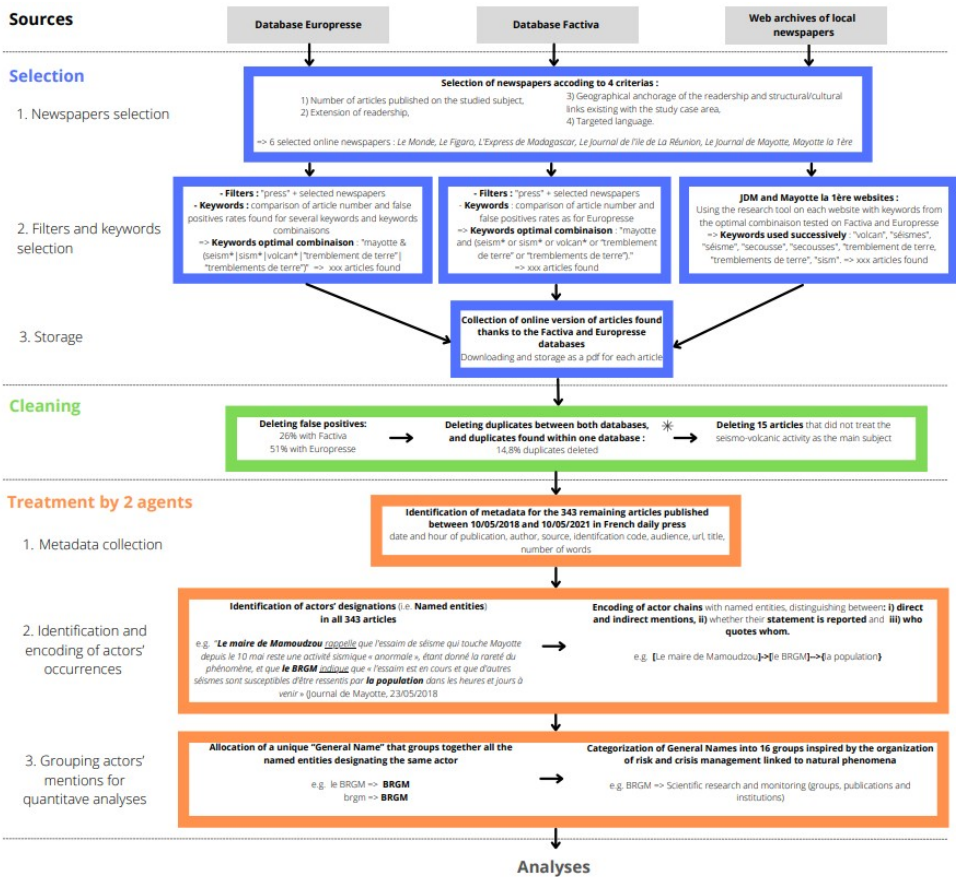

\* Analysis on a representative sample of articles (74,2% of the articles in our database)

**Figure 1: Schematic view of the process of newspapers' articles collection in treatment before analyses.** The articles are selected from 3 main sources using a combination of keywords (see Supplementary Information for more details on the keyword analysis). Articles are all read a first time in order to identify and delete false positives and duplicates. False positive and negative rates are determined on representative samples (see Supplementary Information). Each article is eventually read independently by 2 to 3 researchers who complete a data table with metadata and treatment variables. Disagreements were discussed and solved collectively.

### 3.2 Indicators

#### 3.2.1 Actors and categories of actors

We use a broad definition of the term “actor” which encompasses both individual and legal entities, groups of individuals sharing a common character or purpose such as a scientific mission or being impacted in the same way by the crisis, but also media agencies who play an active role in communicating about the event (Agence France Presse, Twitter, scientific journals, etc.). Places or buildings (mobile like a boat or immobile like a school) may be described in the media as actors when they are named as synonymous for the individuals they host and are then also selected.

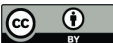

13

To study the press coverage of different categories of “actors” in our corpus, we first followed a double-reading method by human operators enabling us to select and identify each actor or group of actors mentioned in articles, even when they were identified by professional status, by nicknames, etc. This qualitative analysis of the texts in the corpus made it possible to disambiguate the majority of references to actors in the texts. For example, the terminology “experts” can be used to refer to scientists specialising in the hazard as well as to technicians from the Bureau Veritas in charge of assessing the damage and some actors have different affiliations depending the articles due to errors or evolutions in his/her career (e.g. Nathalie Feuillet, a researcher, has been wrongly affiliated to IFREMER in some articles like for instance 20190507\_JDM\_001). A careful reading of the articles is thus needed and generally allows the actors to be categorised. Remaining actors are labelled as “unidentified” in the category Divers/Unidentified (see Part 2 in the Supplementary Information). When an actor is identified in the press article, we note its exact denomination(s) (i.e. named entities) and we build two correspondence tables allowing to : i) identify the different ways of naming the same actor and grouping them under a chosen “general name” (TABLE NamedEntitiesToGeneralName in TABLE SA) and ii) group these actors in categories (see TABLE GeneralNamesToCategories in TABLE SB for a correspondence table between “general names” and “categories”) in order to build a structural analysis.

**TABLE 1: Denominations and definitions of categories used to group actors identified by two human operators in a database of 343 daily press articles published between 10/05/2018 and 10/05/2021 covering the first three years of the recent seismo-volcanic unrest in Mayotte archipelago. Categories are determined according to the organisation of risks and crisis management in France (see Fearnley et al. (2018) and Section 2 in Part 2 of the Supplementary Information).**

| Level 1 of categorization: Usual categories considered in risks and crisis management studies |                                                                                                                                                       |
|-----------------------------------------------------------------------------------------------|-------------------------------------------------------------------------------------------------------------------------------------------------------|
| Name of categories                                                                            | Definition of categories                                                                                                                              |
| Scientific research and monitoring (groups, publications and institutions)                    | Scientific groups, publications, institutions and all groups of people involved in monitoring and research on the sismo-volcanic activity in Mayotte. |
| Scientific research and monitoring (named individuals)                                        | Namely identified scientists involved in monitoring and research on the sismo-volcanic activity in Mayotte.                                           |
| Risks and crisis management actors                                                            | Administrative authorities involved in risk and crisis management activities                                                                          |
| French political institutions                                                                 | French political institutions involving members of the government, the French Parliament and the Senate                                               |
| Public and para-public services to the population (institutions and members)                  | French public or parapublic services to the population                                                                                                |
| Elected local officials                                                                       | Locally elected executive representatives                                                                                                             |
| Mass media and associated journalists                                                         | Includes TV, radio, magazines, newspapers and associated journalists                                                                                  |
| Social media/Internet                                                                         | Social media or websites                                                                                                                              |
| Civil society, private sector and NGOs                                                        | Civil society, private sector and NGOs                                                                                                                |





15

|                                               |                                                                                                                                  |
|-----------------------------------------------|----------------------------------------------------------------------------------------------------------------------------------|
| Local identified personalities                | Influential figures in Mayotte                                                                                                   |
| At-risk populations in Mayotte                | Populations living in Mayotte and exposed to natural hazards                                                                     |
| Educational staff and institutions            | Educational staff and institutions in Mayotte and mainland France                                                                |
| Students and schoolers in Mayotte             | Children living in Mayotte when mentioned in school contexts                                                                     |
| Other populations                             | Populations living outside of Mayotte                                                                                            |
| Foreign states, communities and personalities | Foreign state actors, personalities or communities that are not involved in scientific or risk and crisis management activities  |
| Divers/Unidentified                           | All actors that could not be categorised in the previous categories because unidentified, or belonging to more than one category |

226

227 **3.2.2 Direct vs indirect mentions and reported speech vs simple mention**

228 A direct mention is when an actor is cited in the text body by the author of the article without being introduced by another  
229 actor. Indirect mention corresponds to the case when an actor is mentioned through a third party in the article. For  
230 example, in the sentence “An earthquake with a magnitude of 4.0 was recorded by the Bureau of Geological and Mining  
231 Research (BRGM) informs the prefecture”, the citation of the prefecture is declared as direct and that from the BRGM as  
232 indirect. This distinction allows us to measure the interactions between categories of actors in the press, and in particular  
233 the most frequent citation links, the direction of these relationships (and therefore their potential asymmetry) and finally  
234 the more or less central position of actors and categories of actors within the citation network.  
235 We also draw a distinction between reported speech and simple mentions of actors (see TABLE 2). Reported speech can  
236 be direct or indirect. ~~What we identify as~~ reported speech includes everything that the journalist presents as being the  
237 word or opinion of this actor, whether it appears to be reported directly (with the use of quotation marks for example) or  
238 indirectly, or even distorted. For e.g. in the sentence : “In May 2018, when the swarm of earthquakes began to shake  
239 Mayotte, the first scientists rushing to the island did not believe in volcanic activity”, we consider that a voice is given to  
240 the scientists since the news item is supposed to convey their beliefs. On the contrary, in the sentence “End of mission:  
241 French prefect Dominique Sorain leaves Mayotte”, we consider that Dominique Sorain is “simply mentioned”.

242  
243  
244  
245  
246  
247  
248  
249  
250  
251  
252





17

253 **TABLE 2 : Illustration of the distinctions direct mention vs indirect mention and reported speech vs simple mention using the**  
254 **actor “prefecture”.**

|                 | Direct mention                                                                                                             | Indirect mention                                                                                                                                                                                                     |
|-----------------|----------------------------------------------------------------------------------------------------------------------------|----------------------------------------------------------------------------------------------------------------------------------------------------------------------------------------------------------------------|
| Reported speech | <p>“The <u>prefecture</u> confirms that no fewer than 13 tremors were recorded.”</p> <p>Journal de Mayotte, 05/12/2018</p> | <p>“On Tuesday evening, <u>they [prefecture]</u> had to deny on Twitter a rumor indicating that a strong magnitude earthquake could occur soon ‘This rumor is totally unfounded’. ”</p> <p>Le Figaro, 05/16/2018</p> |
| Simple mention  | <p>“The Mayotte <u>prefecture</u> activated its crisis unit this morning.”</p> <p>Le Figaro, 05/16/2018</p>                | <p>“They [STTM members] criticized the <u>prefecture’s</u> poor communication.”</p> <p>Mayotte la 1ère, 08/08/2019</p>                                                                                               |

255

256 **3.2.3 Actor network analysis**

257 ~~We describe~~ the system of actors in the Mayotte seismo-volcanic activity reported in the press using two global network  
258 analysis indicators and further detect the presence of small communities using the Louvain clustering method. We study  
259 the system of actors depicted by the network of citations in order to better understand the relationships between people  
260 and categories of actors and their evolutions using network centrality indices and network diagrams plotting citation links  
261 with arrows and weighting the size of the nodes and of the fonts of the generic names by their number of connections  
262 (degree). Unidentified actors are removed from the graph plot to avoid false co-citation relationship structures.  
263 ~~In order~~ to study the position of the actors in the citation networks (source and destination of a citation) derived from the  
264 corpus, we use two indicators from network analysis at the node level: degree centrality and betweenness centrality.  
265 Degree centrality measures the number of links held by a node. It captures the amplitude of the network with which an  
266 actor is connected in the media, through the citation process. We distinguish in- and out-degree centrality, i.e. the number  
267 of actors by which an actor has been mentioned and the number of actors that he/she has mentioned. The actors with the  
268 highest out-degree index values are those with the strongest activity in transmitting and communicating the experiences,  
269 opinions, speeches and actions of other stakeholders (including Mayotte’s population). On the contrary, a high in-degree  
270 index demonstrates a central position in the network linked to strong interest from third parties. The study of the ratio  
271 between in and out-degree centrality makes it possible to study the level of reciprocity of these two states. Betweenness  
272 centrality measures the number of times a node lies on the shortest path between two other nodes. The values are  
273 normalised by the number of node pairs in the graph (direction of citations are not accounted for). A high betweenness  
274 index indicates that an actor plays an important role in connecting the network of actors depicted in the media, and in  
275 particular the subgroups that the citation relationships update, either because he/she positions himself/herself at the centre  
276 of the network, or because he/she is positioned on the periphery of several clusters. Actors with high betweenness are key  
277 bridges between different parts of a network.

278 Here, we provide 8 different graphs matching the 8 major periods subdivision of the seismo-volcanic activity press  
279 coverage proposed by Devès et al. (2022b). This allows us to examine the evolution of the network at different periods,  
280 each characterised by the occurrence of a new external disturbance (first earthquakes, first discussions regarding the  
281 hypothesis of a volcanic origin, discovery of the volcano, public conference, etc).



19

282

283 **4. Results**

284 **4.1 Actors' mentions in the corpus**

285 TABLE 3 presents a set of descriptive statistics on the frequency and form of actors' mentions in ~~our~~ corpus. The  
286 newspapers under study have not all published with the same frequency on the events: the national daily *Le Monde*  
287 devoted 10 articles to the subject, while 190 articles were published by the local daily *Journal de Mayotte*. Differing  
288 publication rates result in differing actors' mentions rates depending on newspapers: *Le Monde* names 310 actors (often  
289 repeatedly), while this number peaks at 2,541 for the *Journal de Mayotte*. Beyond this rate effect, we also find differences  
290 in the diversity of the actors that are mentioned: *Le Monde*, the national daily *Le Figaro* and the regional daily *Le Journal*  
291 *de l'Île de la Réunion* respectively mentioned on average 31, 20 and 20 actors per news item, while this mean value only  
292 reached 13 for *Le Journal de Mayotte*, 12 for the local daily *Mayotte la 1ère* and fell to 10 for the regional daily  
293 *L'Express de Madagascar*. An inverse relationship emerges between publication rates and the average number of actors'  
294 mentions per article. Ultimately, the position of actors in the citation network will be driven by the most prolific media,  
295 which we control by building our analyses on relative indicators.

296

297 Another source of variability in the media coverage of the actors lies in the space left by each newspaper to the direct or  
298 indirect mention of actors, and the reported speech of these actors versus their simple mention. If the trend is +/-80% for  
299 direct mentions per article (compared to +/-20% for indirect mentions), this proportion drops to 66.7% for the national  
300 daily *Le Figaro*. However, this newspaper is distinguished by the highest frequency of reported speech (68.6%) as  
301 opposed to simple mentions, whether they appear directly (70.2% of reported speech) or indirectly (65.3% of reported  
302 speech). The regional daily *L'Express de Madagascar* also has high proportions of reported speech (66.8%, as compared  
303 to simple mention), but this is mainly the case for the actors mentioned directly (74% of reported speech) and does not  
304 concern as much those mentioned indirectly (40% of reported speech). The local daily *Mayotte la 1ère* has the lowest  
305 rates of reported speech, with 33.6% on average, followed by the regional daily *Journal de l'Île de la Réunion* (42.7%)  
306 and the national daily *Le Monde* (45.5%). Again, the proportion of reported speech is invariably lower among actors  
307 indirectly mentioned by a third party than for actors appearing directly.

308

309 **TABLE 3: Reported speech vs simple mention in each of the 6 newspapers selected. In a database of 343 press articles**  
310 **published from 10/05/2018 to 10/05/2021, we identified actors that played a part in the information chain regarding the seismo-**  
311 **volcanic activity off the coast of Mayotte. Indirect mention refers to when an actor is introduced in the press discourse by a**  
312 **third party as opposed to direct mention. A distinction is drawn between actors whose speech or opinion is reported, when**  
313 **anything presented as their word or opinion is reported, even distorted, and actors that are simply mentioned.**

|            | Number of news items | Number of actors mentioned | Average number of actors mentioned per news item | Direct mention  |                |       | Indirect mention |                |       | Share of direct mentions in total | Share of reported speeches in total |
|------------|----------------------|----------------------------|--------------------------------------------------|-----------------|----------------|-------|------------------|----------------|-------|-----------------------------------|-------------------------------------|
|            |                      |                            |                                                  | Reported speech | Simple mention | Total | Reported speech  | Simple mention | Total |                                   |                                     |
| Journal de | 190                  | 2541                       | 13                                               | 1112            | 825            | 1937  | 185 (30.6%)      | 419            | 604   | 76.2%                             | 51.0%                               |

20



21

|                                |    |     |    |             |             |     |            |             |     |       |       |
|--------------------------------|----|-----|----|-------------|-------------|-----|------------|-------------|-----|-------|-------|
| Mayotte                        |    |     |    | (57.4%)     | (42.6%)     |     |            | (69.4%)     |     |       |       |
| Mayotte la lère                | 82 | 999 | 12 | 292 (36.4%) | 511 (63.6%) | 803 | 44 (22.4%) | 152 (77.6%) | 196 | 80.4% | 33.6% |
| L'Express de Madagascar        | 25 | 259 | 10 | 151 (74.0%) | 53 26.0%    | 204 | 22 (40.0%) | 33 (60.0%)  | 55  | 78.8% | 66.8% |
| Journal de l'Île de la Réunion | 21 | 422 | 20 | 160 (44.9%) | 196 (55.1%) | 356 | 20 (30.3%) | 46 (69.7%)  | 66  | 84.4% | 42.7% |
| Le Figaro                      | 15 | 296 | 20 | 139 (70.2%) | 59 (29.8%)  | 198 | 64 (65.3%) | 34 (34.7%)  | 98  | 66.9% | 68.6% |
| Le Monde                       | 10 | 310 | 31 | 132 (51.8%) | 123 (48.2%) | 255 | 9 (16.4%)  | 46 (83.6%)  | 55  | 82.3% | 45.5% |

314

315

316

317

318

319

320

321

322

323

324

325

326

327

328

Beyond these structural characteristics, the media are distinguished by the place given to different categories of actors (Fig. 2), revealing specialisations in the event narration. If the actors linked to scientific research and monitoring (groups, publications and institutions) are the most present in all the newspapers, this proportion varies from one media to another: they are prevalent within the regional daily *Journal de l'Île de la Réunion*, and, to a lesser extent, within *Le Monde*, while they only represents less than a quarter of the actors mentioned by the national daily *Le Figaro*. This trend is reinforced if we add up the scientific and monitoring actors whose names are explicitly mentioned. The second category of actors most represented in the different media is that of risk and crisis management actors. Again, this proportion varies from one media to another (the highest rates are observed in the regional daily *L'Express de Madagascar* and in the national daily *Le Figaro*). Interestingly, the populations at risk in Mayotte do not exceed **the** quarter (or even the tenth in certain newspapers such as the local daily *Journal de Mayotte*, the regional daily *Journal de l'Île de la Réunion* or *Le Monde*) of the shares of actors mentioned in the media. The relative presence of other groups of actors is more variable from one media to another: for example, citations of social networks are more common in *Le Figaro* than in other newspapers, and we observe a smaller frequency of actors from the French political institutions category in local newspapers than in national and regional newspapers (with the clear exception of *Le Figaro*).



23

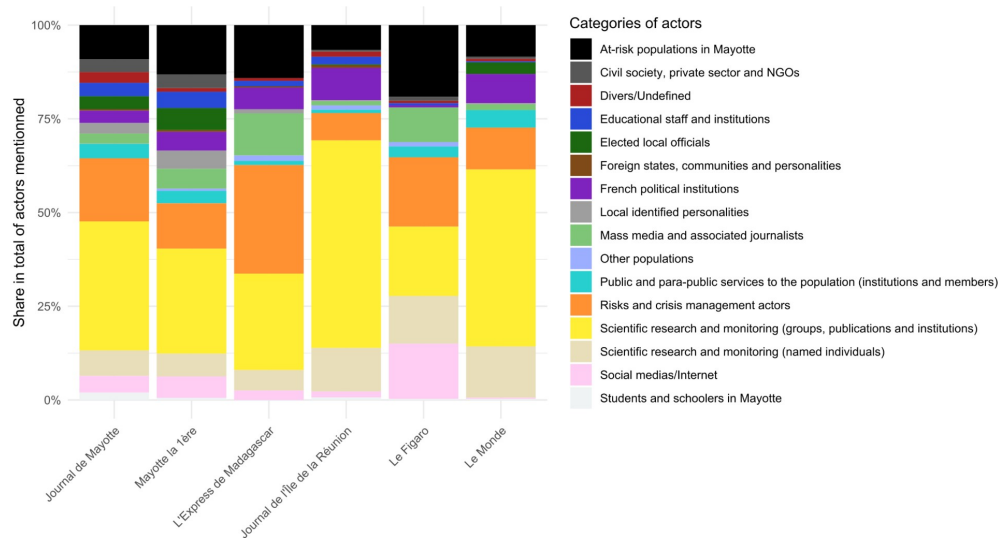

**Figure 2: Variations in relative share of crisis actor categories in all publications by media. Categories were inspired from the organisation of risks and crisis management in France (see Fearnley et al., 2018 and Section 2 in Part 2).**

**4.2 Direct speech opportunity vs framing of speech / reported speech**

TABLE 4 reports the volume and share of direct or indirect mentions, and of reported speech or simple mentions, by category of actors in the entire corpus. Each category stands out as being mainly named in the news without an intermediary (i.e. through a direct mention), but for certain groups, their mentions in an article consecutive to a third party (i.e. indirect mention) are more common than for others. This is particularly the case for Mayotte’s populations, which, in more than 4 cases out of 10, are indirectly mentioned in the articles. The share of direct mentions is also relatively lower (to a lesser extent) for public and para-public services to the population (institutions and members) and for the students and schoolers in Mayotte (more than 3 cases out of 10) than for other groups. Named scientific and monitoring actors and local identified personalities groups are the ones that are the most frequently directly mentioned in the corpus.

There are large variations between categories of actors in terms of relative importance of reported speech compared to simple mentions. The analysis shows that scientific, media and institutional actors benefit from more frequent reported speech than lay people. For instance, the total proportion of reported speech for students and schoolers in Mayotte is only 10.8% and 32.4% for the at-risk populations in Mayotte, while it reaches 62.9% for local personalities, 77.2% for scientific research and monitoring named individuals, 78.8 % for mass media and associated journalists and 83.3% for the social media/Internet. Among the categories identified, only named scientific actors and foreign states, communities and personalities have a higher share of reported speech when mentioned indirectly by a third party than by a direct mention in the article, which seems to illustrate the importance of these external points of view on the perception of the crisis by the various local actors.



25

**TABLE 4: Key figures on the mentions of categories of actors in all the news items of the corpus. In a database of 343 press articles published from 10/05/2018 to 10/05/2021, we identified categories of actors that could play a part in the information chain regarding the seismo-volcanic activity off the coast of Mayotte. Indirect mention refers to when an actor is introduced in the press discourse by a third party as opposed to direct mention. A distinction is drawn between actors whose speech or opinion is reported (anything presented as their word or opinion, even distorted) and actors that are simply mentioned.**

|                                                                              | Number of mentions | Direct mention  |                |             | Indirect mention |                |            | Share of direct mentions in total | Share of reported speeches in total |
|------------------------------------------------------------------------------|--------------------|-----------------|----------------|-------------|------------------|----------------|------------|-----------------------------------|-------------------------------------|
|                                                                              |                    | Reported speech | Simple mention | Total       | Reported speech  | Simple mention | Total      |                                   |                                     |
| Scientific research and monitoring (groups, publications and institutions)   | <b>1762</b>        | 633 (43.7%)     | 815 (56.3%)    | <b>1448</b> | 100 (31.8%)      | 214 (68.2%)    | <b>314</b> | <b>82.2%</b>                      | <b>41.6%</b>                        |
| Risks and crisis management actors                                           | <b>683</b>         | 334 (63.9%)     | 189 (36.1%)    | <b>523</b>  | 58 (36.3%)       | 102 (63.7%)    | <b>160</b> | <b>76.6%</b>                      | <b>57.4%</b>                        |
| At-risk populations in Mayotte                                               | <b>549</b>         | 122 (37.7%)     | 202 (62.3%)    | <b>324</b>  | 56 (24.9%)       | 169 (75.1%)    | <b>225</b> | <b>59.0%</b>                      | <b>32.4%</b>                        |
| Scientific research and monitoring (named individuals)                       | <b>355</b>         | 237 (76.0%)     | 75 (24%)       | <b>312</b>  | 37 (86.0%)       | 6 (14.0%)      | <b>43</b>  | <b>87.9%</b>                      | <b>77.2%</b>                        |
| French political institutions                                                | <b>208</b>         | 85 (53.1%)      | 75 (46.9%)     | <b>160</b>  | 11 (22.9%)       | 37 (77.1%)     | <b>48</b>  | <b>76.9%</b>                      | <b>46.2%</b>                        |
| Social media/Internet                                                        | <b>186</b>         | 134 (90.5%)     | 14 (9.5%)      | <b>148</b>  | 21 (55.3%)       | 17 (44.7%)     | <b>38</b>  | <b>79.6%</b>                      | <b>83.3%</b>                        |
| Mass media and associated journalists                                        | <b>179</b>         | 120 (81.6%)     | 27 (18.4%)     | <b>147</b>  | 21 (65.6%)       | 11 (34.4%)     | <b>32</b>  | <b>82.1%</b>                      | <b>78.8%</b>                        |
| Public and para-public services to the population (institutions and members) | <b>148</b>         | 31 (34.1%)      | 60 (65.9%)     | <b>91</b>   | 7 (12.3%)        | 50 (87.7%)     | <b>57</b>  | <b>61.5%</b>                      | <b>25.7%</b>                        |
| Educational staff and institutions                                           | <b>135</b>         | 29 (31.5%)      | 63 (68.5%)     | <b>92</b>   | 11 (25.6%)       | 32 (74.4%)     | <b>43</b>  | <b>68.1%</b>                      | <b>29.6%</b>                        |
| Civil society, private sector and NGOs                                       | <b>129</b>         | 39 (39.8%)      | 59 (60.2%)     | <b>98</b>   | 4 (12.9%)        | 27 (87.1%)     | <b>31</b>  | <b>76.0%</b>                      | <b>33.3%</b>                        |
| Local identified personalities                                               | <b>116</b>         | 66 (66.0%)      | 34 (34.0%)     | <b>100</b>  | 7 (43.7%)        | 9 (56.3%)      | <b>16</b>  | <b>86.2%</b>                      | <b>62.9%</b>                        |
| Elected local officials                                                      | <b>111</b>         | 47              | 38             | <b>85</b>   | 5 (19.2%)        | 21             | <b>26</b>  | <b>76.6%</b>                      | <b>46.8%</b>                        |

26

13



27

|                                               | Number of mentions | Direct mention  |                |       | Indirect mention |                |       | Share of direct mentions in total | Share of reported speeches in total |
|-----------------------------------------------|--------------------|-----------------|----------------|-------|------------------|----------------|-------|-----------------------------------|-------------------------------------|
|                                               |                    | Reported speech | Simple mention | Total | Reported speech  | Simple mention | Total |                                   |                                     |
|                                               |                    | (55.3%)         | (44.7%)        |       |                  | (80.8%)        |       |                                   |                                     |
| Students and schoolers in Mayotte             | 65                 | 6 (13.3%)       | 39 (86.7%)     | 45    | 1 (5.0%)         | 19 (95.0%)     | 20    | 69.2%                             | 10.8%                               |
| Divers/Unidentified                           | 64                 | 56 (98.2%)      | 1 (1.8%)       | 57    | 1 (14.3%)        | 6 (85.7%)      | 7     | 89.1%                             | 89.1%                               |
| Other populations                             | 20                 | 7 (63.6%)       | 4 (36.4%)      | 11    | 1 (11.1%)        | 8 (88.9%)      | 9     | 55.0%                             | 40.0%                               |
| Foreign states, communities and personalities | 20                 | 5 (33.3%)       | 10 (66.7%)     | 15    | 3 (60.0%)        | 2 (40.0%)      | 5     | 75.0%                             | 40.0%                               |

359

360 4.3 Position of actors in the citation network

361 The cross-analysis of the identification frequencies of actors as source or recipient of a quotation in the corpus (Figure 3)  
362 indicates that the role played by the prefecture of Mayotte and its main representatives in communicating about the event  
363 is central, since their appearances in the media largely lead to the mention of other actors. Many mentions of actors in the  
364 event also come from the **Twitter** network, which appears to be an essential primary source in the media story. A few  
365 local personalities also emerge as central nodes of the network, and make it possible to relay information concerning a  
366 large number of actors. This is the case of: i) Saïd Saïd Hachim, a Mahorese geographer working at the Departmental  
367 Council of Mayotte ~~also achieving a PhD in geography at Paul Valéry Montpellier 3 University in mainland France~~; ii)  
368 Lieutenant-Colonel Philippe Blanc, a member of the Directorate-General for Civil Protection and Crisis Management  
369 (part of the Bureau for Exercise Planning, Feedback and Coordination of the Beauvau Crisis Centre in the Directorate-  
370 General for Civil Protection and Crisis Management.) **who exercises** at a national level and was sent **in** Mayotte in June  
371 2018 as a member of an interministerial delegation for civil protection in the context of the seismic crisis; iii) Eric  
372 Humler, scientific director of REVOSIMA (volcanological and seismological monitoring network in Mayotte) from 2019  
373 to 2022 and **in** charge of the coordination of the TelluS-Mayotte mission, and iv) Frédéric Tronel, the regional director of  
374 BRGM (French geological survey ~~BRGM~~) in Mayotte from 2017 to 2020. **The UDAF (Departmental Union of Family**  
375 **Associations)** interestingly emerges as a key player in the chains of citation of the actors within the corpus. This can be  
376 explained by the meeting they organised on the 5<sup>th</sup> of June 2018 to relay people's experiences and promote dialogue  
377 between local actors (among them, state institutions, public and para-public services to the population, local elected  
378 representatives, ect) regarding the measures to be taken at the start of the seismic crisis (*Le Monde*, 14/06/2018 and  
379 *Journal de Mayotte*, 01/06/2018) and which was relayed by both local and national press. On the contrary, the Mahorese  
380 population and, to a lesser extent, the schoolchildren, **highly** cited but not often at the origin of the citation of a third  
381 actor, **1** indicate a relatively passive position within the citation network extracted from the corpus. This is also the case for

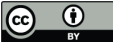

29

the ~~French geological survey~~ BRGM, the REVOSIMA (Volcanological and seismological monitoring network in Mayotte) and the scientific community (in general), which are regularly used as a source of information by third party actors whose words are reported (directly or indirectly) in the articles.

Figure 4 shows an exponential relationship between the normalised values of the betweenness indices and the ranks, indicating a hierarchical structure of the network through the concentration of citation interactions by a small proportion of actors. The Mahorese population emerges as the key connection element of the network of actors constructed from citation links in the media, a role also highly played by the local expert Saïd Saïd Hachim. The central role of the prefect and the prefecture, representing the French State in the department, is also depicted. The scientific community as a whole, the ~~French geological survey~~ (BRGM) and the REVOSIMA also appear to be essential elements in the structuring of the network, so is the online social media Twitter allowing media visibility for individuals and institutions, and promoting citation chains via re-tweets and identifications. Expectedly, individuals with many connections also have high degrees of betweenness: Philippe Blanc, Eric Humler, Frédéric Tronel mentioned above as well as Nathalie Feuillet, observatory physicist at IPGP (Institut de physique du globe in Paris) and mission leader of the first oceanographic campaigns (MayObs 1 and 2), who, despite lower in-degree and out-degree values, contributes to concentrating a relatively large number of shortest paths in the network.

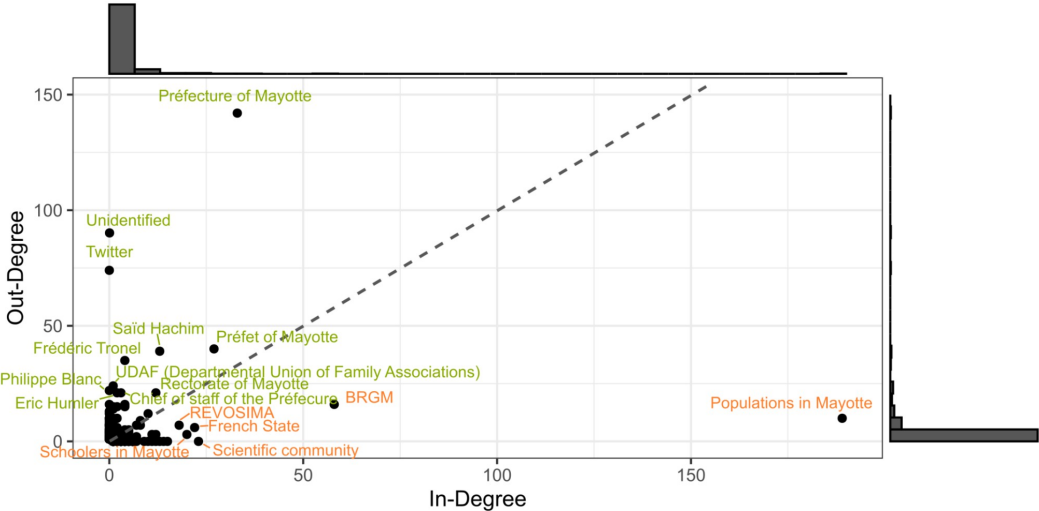

Figure 3: In- and out-degree distributions per category of actors in all the news items of the corpus. Scatterplot of the number of times an actor is mentioned at the start of a quoting chain (out-degree) over the number of times he or she is mentioned as a recipient of a quoting chain (in-degree). The actors who are most often the source of the quote (and who are more often the source than the one cited) are presented in green, while the actors who are most often the subject of the quote (and who are more often the one cited than the source of a quote) are presented in orange.





31

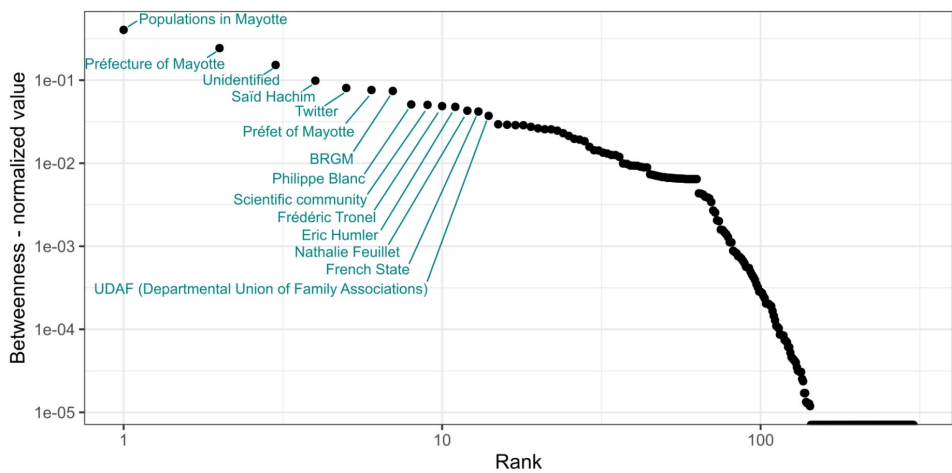

**Figure 4: Rank size distribution of betweenness centrality values. The plot shows the relationship between betweenness normalized values of actors and ranks (in logarithmic scales).**

#### 4.4 Actor network structure

The 126 articles published during the first months of the crisis (~~period 1~~, from 05/10/18 to 07/26/18) reflect a network of highly interconnected actors structured around actors polarising a certain number of citations (Figure 5): these are the Mayotte population as a whole, the prefecture of Mayotte and the prefect, the Departmental union of family affairs, actors of the educational system (rectorate, teachers), but also mayors (association of mayors, mayor of Mamoudzou-the capital city, mayor of Chirongui, or other municipalities) and the social network Twitter. The municipality of Chirongui stands out here, probably because its hosting of the Groupe d'Intervention Macrosismique served as an entry point for the presentation of the group in the local press, what's more, the mayor at the time remained in office from 2008 to 2020 and her team seems to have been particularly active and well integrated into the local community. The citation network is extensive, and all categories of actors are present with the exception of local personalities (although many groups made up of members from civil society, associations and businesses appear in the network). Interestingly, if the citation chains from the entire corpus show paths between actors belonging to the same category, the network itself presents a certain heterogeneity. The prefecture of Mayotte relayed information from local and other national risks and crisis management actors, but also from scientific research and monitoring institutions, groups and publication, and was cited by and communicated through a variety of mass media and social media. The articles in the corpus also make it possible to link the prefecture of Mayotte to the Mahorese population, as well as to various public and parapublic services such as hospitals. Thus the prefecture emerges as the central actor in the management of this first period of the seismo-volcanic activity, which is in accordance with the missions of security of people and property and representation of the State which are conferred. It is interesting to note that the prefect's interventions and mentions in the press do not link him to the same actors as the institution he represents. His communications aimed at the civilian population and representatives of civil society and associations, stakeholders in the educational world, and mayors. Actors from the delegation of specialists in civil security and natural risks like Mendy Bengoubou appear as intermediate nodes between the prefecture and the



33

433 prefect, with whom they share a large number of co-cited actors. Conversely, in these first months of the crisis, the  
434 citation networks between scientific actors appear fragmented and local elected officials relatively peripheral.  
435

**Period 1: 05-10-2018 to 07-26-2018**  
*First months of the sismo-volcanic crisis*

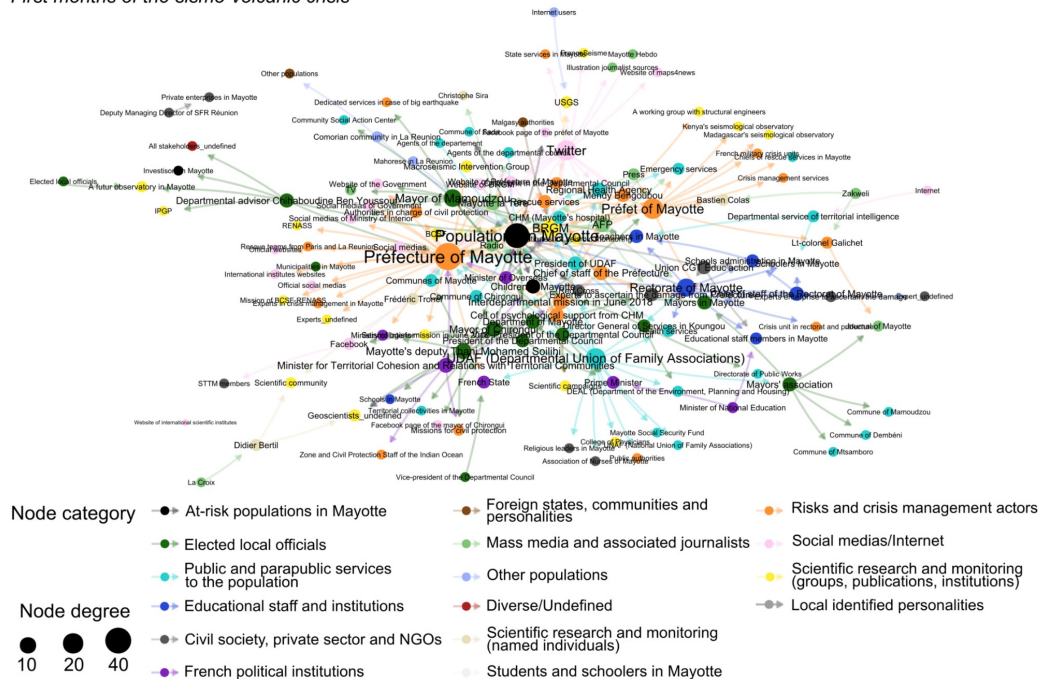

**Figure 5: The citations network of actors in the press during the first months of the sismo-volcanic crisis**

The network of citations (Figure 6) for the second period (selection of 29 articles mentioning and discussing the volcanic hypothesis and the first subsidence data between October 05th, 2018 and July, 26th 2018). Just as for the first period of the crisis, the population (cited by numerous actors, but never at the origin of a single quote) finds itself at the centre of the network. The prefecture and the prefect (and to a lesser extent the chief of staff of the prefect) still emerge as central nodes of the network, as the origin of numerous citations. Only the prefecture, as an institution, receives a significant number of quotes in return, from various categories of actors. Once again, the institution is separated from its two key figures (prefect and chief of staff) within the citation network, with the exception of common citations to the population and the BRGM. The BRGM is also the destination of numerous citations from scientific actors, which it allows to partially aggregate within the network. Two scientific personalities stand out for the plurality of co-citation links they create: Laure Fallou and Frédéric Tronel. The first is a sociologist research officer at EMSC (Euro-Mediterranean Seismological Centre) who wrote an academic paper calling attention to the emergence of a mistrusting atmosphere and circulation of misinformation due to a lack of scientific information linked with the scarcity of seismic data. Fallou et al. (2020) was published in 2020, but it has also been the subject of a public communication at the General Assembly of the European Geosciences Union in April 2019. The second was the regional director of BRGM in Mayotte between 2017 to

2020. In contrast, Nathalie Feuillet as an observatory physicist, the University of La Rochelle in mainland France and Tellus Mayotte oceanographic mission from IPGP are isolated. Christophe Sira, a macroseismic surveyor member of the Macroseismic Intervention Group, and Laurent Michon, a research professor at University on La Réunion island, are also separated from other scientific actors. Likewise, Bastien Colas and Mendy Bengoubou, 2 out of the 3 members of the delegation of specialists in civil security and natural risks dispatched by two ministries (Ministry of Ecology and Ministry of the Interior) to assess the seismo-volcanic activity on site in June 2018, are cited separately (and are separated from mentions of the interdepartmental mission they belonged to), while the third expert, Lieutenant-Colonel Olivier Galichet is not mentioned in the selected articles. Once again, the actors in the medico-social world, at the origin of citations to various actors, have intermediate positions in the network, while the actors in the educational world find themselves more isolated than during the previous period. Another important distinctive element is the introduction of a first identified local personality, Saïd Saïd Hachim, in the network, which only cites the prefecture in this sub-corpus of the article as he relayed and detailed a note from the prefecture mentioning the volcanic origin hypothesis derived from the latest GPS data. Local fishermen also appear in the network of actors via citations from IFREMER and the chief of staff of the prefecture, following the discovery of deep-sea dead fishes about 50 km eastward from coast.

### Period 2: 05-24-2018 to 05-10-20

#### Volcanic hypothesis and subsidence data

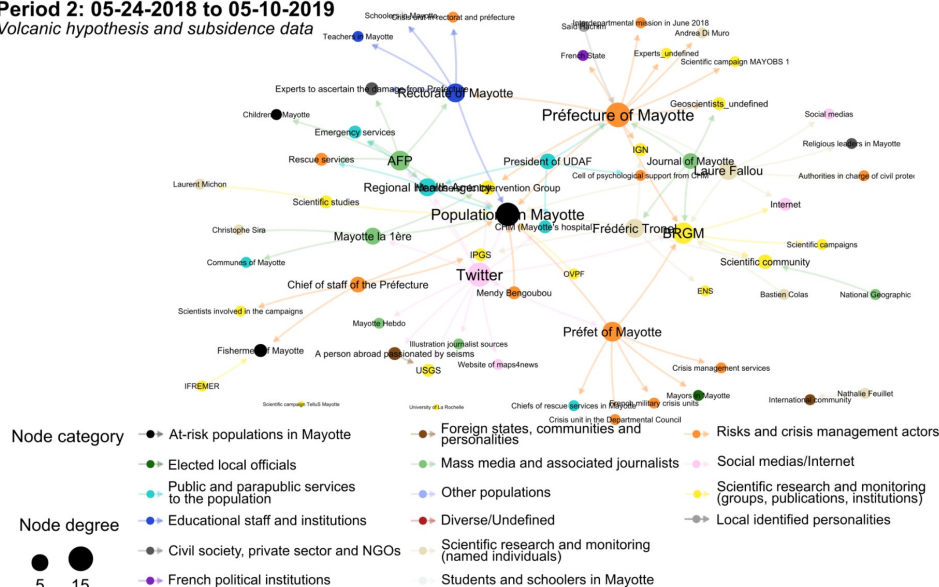

473

477



37

reports in Mayotte” which was created after the first earthquakes of 2018) or as relays for scientific voices such as Saïd Saïd Hachim is strengthened. Philippe Blanc, as a member of a Civil Security mission on volcano-related risks, also appears as an important source of citations in the network, mainly for other risks and crisis management actors, without benefiting from any quote from a third party in return. This is also the case of Jean-Michel Audibert, who was part of the same mission for civil security, without the two actors sharing any other common citation than that of the Mahorese population. The various ministries involved in crisis management and the French state are only indirectly connected to each other, reflecting segmented cooperation networks even within the framework of inter-ministerial actions. The Ministry of Overseas Territories introduces numerous actors into the citation network, including REVOSIMA (~~Mayotte’s volcanological and seismological monitoring network~~) which was just created on the 18<sup>th</sup> of June 2019 and a hypothetical future observatory in Mayotte which is still in the planning stage at the time of writing. The network of scientific actors is more structured and includes more numerous, diverse and international actors than in the previous periods. Indeed, the recording of the waves of a VLP earthquake all over the world on 11/11/2018 has attracted the attention of international institutions and media in addition to that of scientific and political authorities at national level (Hossein and Sadaomi, 2021). It is however interesting to note that the scientific actors named by Eric Humler or via the Twitter network differ from those named by Saïd Saïd Hachim, which mainly relays the names of scientists with whom he had published an atlas of natural risks and vulnerabilities of Mayotte in 2014 and discusses MayObs’ campaigns. Several social networks, the Facebook group S.T.T.M and two local newspapers appear as important nodes of the citation network, mainly citing other media, the Mahorese population, scientists (despite for the STTM Facebook group), public institutions, and the actors of the MayObs oceanographic campaigns carried out from the Ifremer ship Marion Dufresne. Interestingly, the member of the MayObs oceanographic campaigns are not cited by the same actors, reflecting a sequencing of the actors mentioned in the media as the oceanographic campaigns progress (the Prefecture, the Préfet and Twitter for the 1st campaign, the Ministry of Overseas and Saïd Saïd Hachim for the 4th, while interministerial communiqués do not distinguish between the different missions).

501



39

**Period 3: 05-16-2019 to 08-30-2019**  
*Discovery of the volcano*

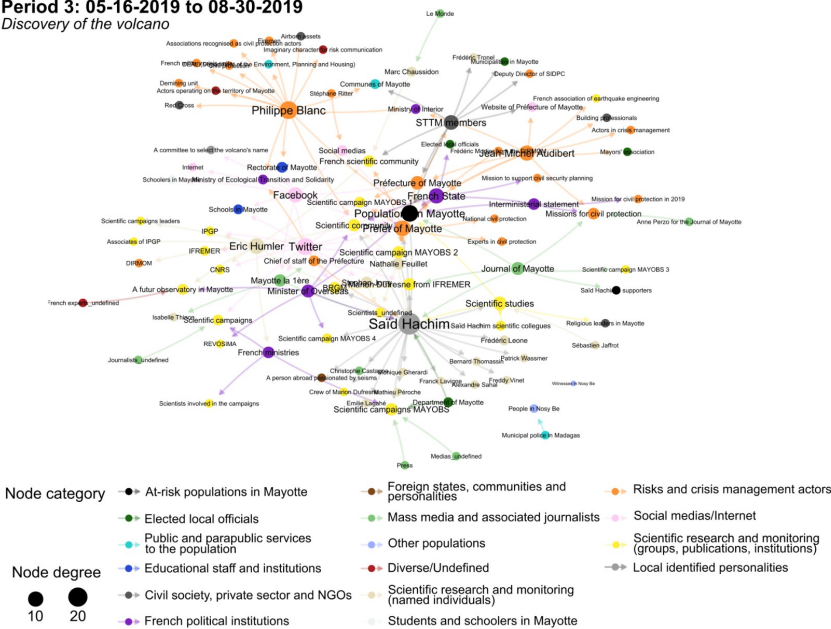

**Figure 7 : Citations network of actors in the press after the discovery of the volcano.**

Period 4 focuses on a particular moment intersecting period 3: the organisation of a conference for local elected officials and the press organised by the prefecture and led by scientists who participated in the discovery of the volcano. It includes 6 articles published between July 31, 2019 and August 9, 2019. As shown in the network of actors represented in Figure 8, Nathalie Feuillet plays the role of intermediary between, on the one hand, the part of the network structured around Saïd Saïd Hachim and that structured around the STTM Facebook group with which she is indirectly linked via his quote of the prefecture. Without this, the network of actors appears fragmented, even between actors at the heart of the event: the scientists, the representation of the French State via the prefecture, the prefect and his chief of staff, but also via the Interministerial Defense and Civil Protection Service (SIDPC), just like the Ministry of Overseas Territories and the Ministry of Ecological and Inclusive Transition. Frédéric Tronel and Isabelle Thinon are the only scientists named by a third party, the STTM Facebook group for the first and the local news broadcast Mayotte la 1ère for the second. Added to this low presence of named scientific actors is the absence of a mention of specific scientific institutions, in favour of abstract mentions of the community.



41

**Period 4: 07-31-2019 to 08-09-2019**

*Conference for local elected officials and the press*

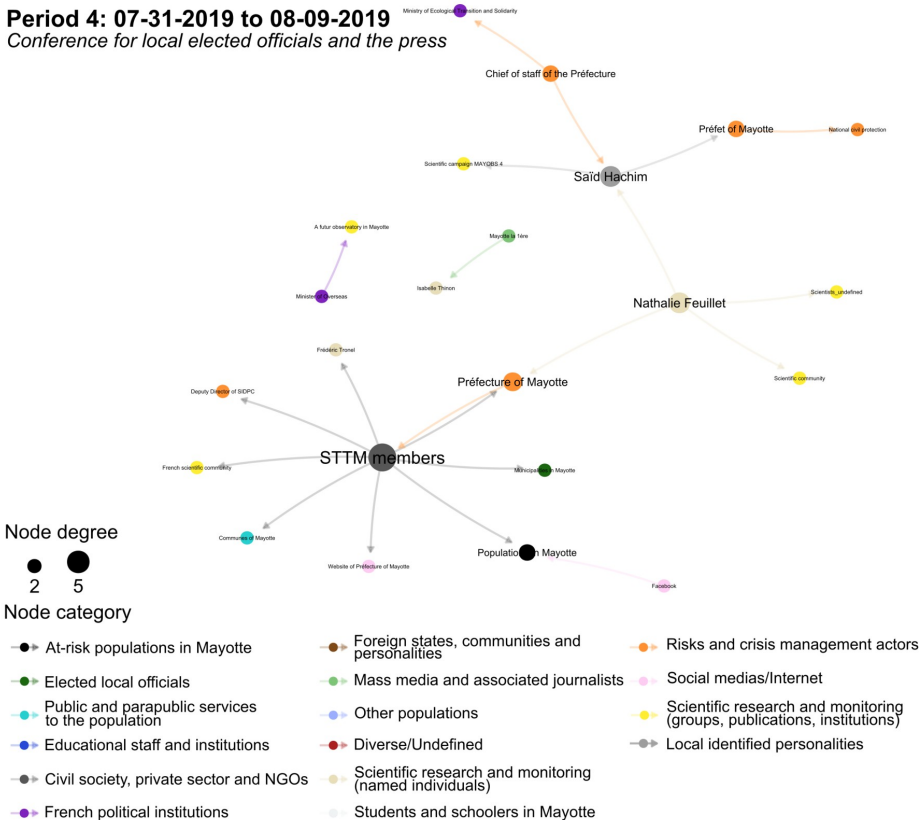

**Figure 8: Citations network of actors in the press following the conference for local elected officials and the press organised by the prefecture.**

Period 5 focuses on a second particular moment intersecting period 3: the visit of the Overseas minister in Mayotte. It includes 3 articles published between August 27, 2019 and August 30, 2019. As depicted in Figure 9, the number of cited actors is low. The Minister of Overseas occupies a central place in the network since it mentions 5 other actors: the scientific actors in charge of studying the phenomenon (REVOSIMA and the observation campaign underwater MayObs 4), and the scientific community more generally, as well as the local expert Saïd Saïd Hachim and the Mahorese population, also cited by the prefect. We also note the isolated mention of the French State by Frédéric Mortier (from the interministerial delegation for major overseas risks - DIRMOM) and the unrelated mention of local elected officials.



43

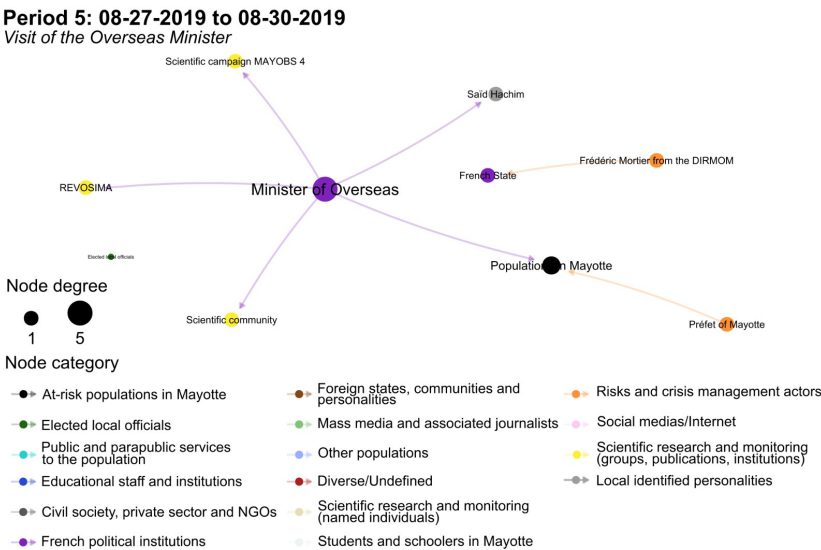

**Figure 9: Citations network of actors in the press following the visit of the Overseas Minister in Mayotte.**

8 articles in the corpus cover the period from September 4, 2019 to October 26, 2019, during which a scientific conference is held at IPGP headquarters in Paris and immediately followed by a public conference operated by scientists and ministerial officials. Interestingly, REVOSIMA (once again solely cited by the Ministry of Overseas Territories) is isolated from the rest of the citation network (Figure 10), even though it brings together the actors in charge of volcanological and seismological monitoring of Mayotte. It is nevertheless the only scientific institute explicitly named, the citation network giving a more central place to individual scientists than to institutions. The network of actors is more fragmented than previously, and its subparts are respectively organised around Nathalie Feuillet (who received citations from various media), Eric Humler (quoting populations from other French overseas departments), the chief of staff of the Préfecture (citing the communes of Mayotte and territorial authorities in general), and the journal *Sciences et vie* (citing Nathalie Feuillet and encompassing the scientific community and French research institutes). Several isolated citations point again to the Mahorese populations (from scientists Virginie Duvat and Frédéric Tronel, but also from the Préfecture of Mayotte and from a local elected official from the capital city Mamoudzou). Once again, the prefecture of Mayotte is separated from the prefect and his chief of staff within the citation network. For the first time, the Prime Minister is cited by an actor, namely the deputy in charge of development in Mamoudzou, regarding a letter the latter sent to the Prime Minister to point out the effects of subsidence on urban development.





45

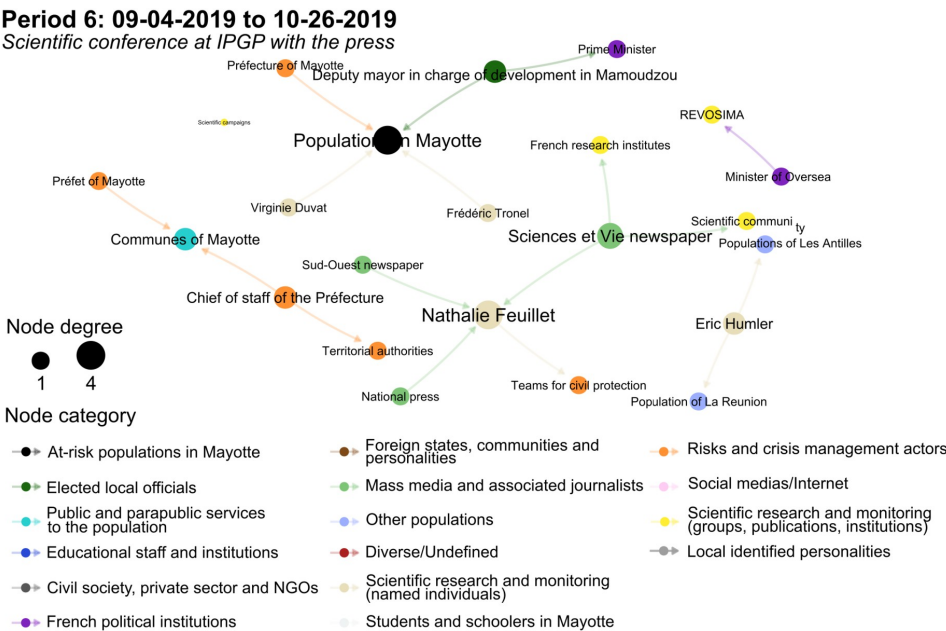

548

549 **Figure 10: Citations network of actors in the press following the scientific conference at IPGP followed by a public conference**  
550 **by scientists and ministerial officials and attended by journalists.**

551

552

553 Period 7, which extends from May 4, 2020 to September 28, 2020 and covers the missions MayObs 13-1 and MayObs  
554 13-2, includes 7 articles from the corpus. Its citation network is shown in Figure 12. For the first time, **REVOSIMA**  
555 appears as a central node of the network, although the number of nodes and links is moderated by the small number of  
556 articles. The REVOSIMA is cited by local expert Saïd Saïd Hachim and by the Prime Minister, but also by the BRGM,  
557 one of its membering institutions. The Prime Minister also cites the IPGP separately from REVOSIMA, even though the  
558 institute is in charge of it. The network of scientific actors appears generally fragmented during these two missions. It  
559 should also be noted that the documentary "Birth of a volcano" produced by *Crestar Productions* and *L'éolienne* and  
560 broadcasted on *Mayotte la 1ère* is not relayed by any actor other than the channel.

561

562 The last period extends from October 28, 2020 to November 3, 2020 and deals with two events recounted in 6 articles:  
563 the "Volcano week" and the first siren alerts in the municipality of Dombéni. The network of actors (Figure 12) is  
564 structured around two parts. The first is organised around Mahorese schoolchildren, and includes quotes from the **chief of**  
565 **staff of the Rectorat** of Mayotte, from the chief of staff of the Préfecture and from the Préfecture itself. The teachers in  
566 Mayotte are part of the citation chain, as they are also quoted by the chief of staff of the Préfecture. Interestingly, schools  
567 in Mayotte (mentioned as actors) belong to the second citation subnetwork, of which they form the periphery thanks to a  
568 citation by Charlotte Mucig, herself cited by the TV and radio show Zakweli broadcasted by **Mayotte la 1ère**. The show  
569 Zakweli also makes the link with Eric Humler and Frédéric Mortier, both citing the Mahorese population. The latter is  
570 also cited by Mahorese associations not identified in the articles, as well as by scientists visiting Mahoran schools during



47

571 the volcano week, who will also mention the MayObs missions on the ship Marion Dufresne more or less explicitly.  
572 Finally, REVOSIMA appears fully isolated from the other actors.  
573

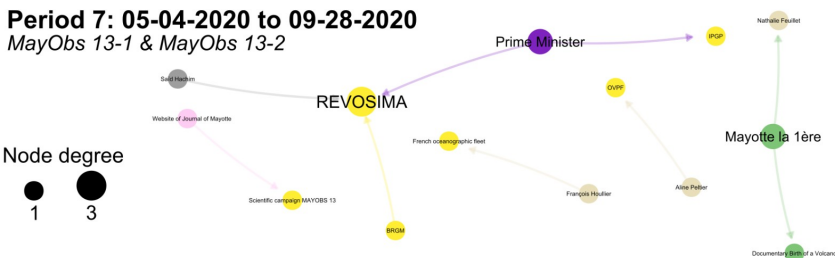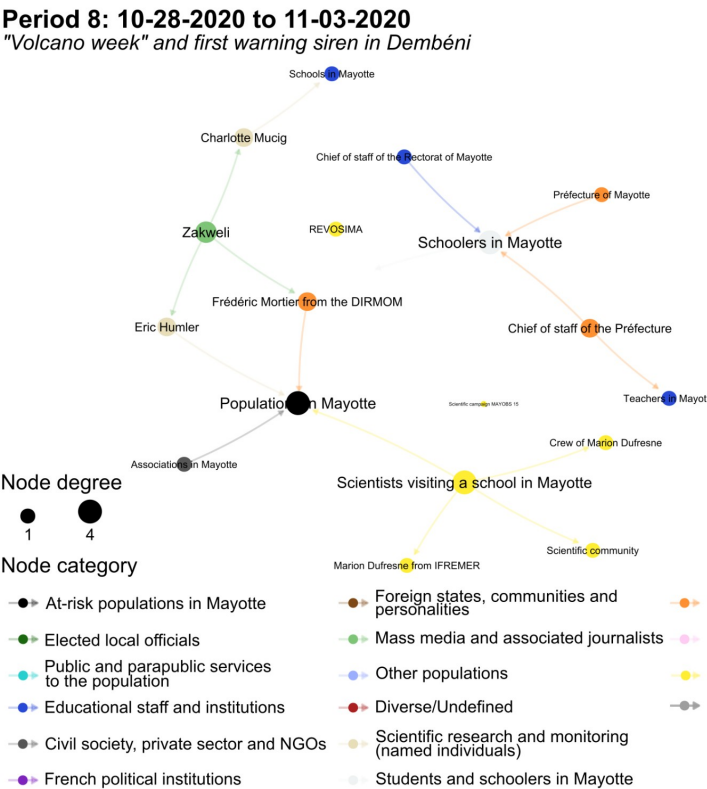

574  
575 **Figure 11: Citation networks of actors during two press-covered events :** In Period 7, the focus lies on the organisation and  
576 execution of two complementary campaigns at sea, MayObs 13-1 and MayObs 13-2. In Period 8, attention shifts to two  
577 communication initiatives from the Mayotte prefecture, namely the “Volcano week” a serie of conferences and activities  
578 related to the discovery of a new volcano designed for schoolers, and the installation of a first siren alert on the territory,  
579 widely relayed by the media.  
580

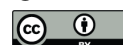

49

## 581 5. Discussion

582 Mass media play a key role in risk and crisis communication, serving as the main information source for millions of  
583 people regarding natural, political and social events (e.g. Gamson and Modigliani, 1989; Allan et al., 2000; Dixon et al.,  
584 2008 ; Aday, 2010). They influence people's perceptions of various actors involved in understanding, monitoring hazards,  
585 and managing their effects, as well as their performance during events (Harris et al., 2012). Despite several limitations in  
586 our study, such as the focus on newspaper representations rather than those among populations, and the use of articles  
587 from six non-specialist French-language newspapers, it provides a comprehensive insight into media narratives during the  
588 seismic-volcanic "crisis" in Mayotte from spring 2018 to spring 2021. The inclusion of additional local, regional, and  
589 national daily papers in different languages and other media forms could enhance the depth of the dataset. However, the  
590 chosen corpus, primarily non-specialist daily press (including *Mayotte la 1ère*, which displays a TV, radio, a written  
591 website, and produces content in both French and Shimaore thus widely followed by inhabitants in Mayotte), remains a  
592 strong candidate for studying representations conveyed by the media as a whole (Cagé et al., 2017), especially  
593 considering the dynamics and complementarity of quantitative and qualitative analyses facilitated by written press data.

594  
595 When examining the results, it is crucial to acknowledge the influence of journalistic writing. Newspapers, acting as  
596 mediators in the broadest sense, have their own practices and priorities in collecting and disseminating information. Daily  
597 newspaper journalists, often generalists with diverse profiles and working methods (Ruellan, 1992), are commonly bound  
598 by the shared constraint of tight deadlines. This limitation may affect their ability to access multiple sources or delve  
599 deeply into the context. Consequently, they tend to prioritise information that is deemed reliable, easily accessible, and of  
600 interest to their readership (van Belle, 2015). Geographic proximity to events influences coverage (e.g. Cavacas et al.,  
601 2016), with local journalists having easier access to the field and local actors. This is evident in the composition of the  
602 selected articles, with a predominant 78% (and 54% in *Journal de Mayotte* alone) being published in local newspapers.  
603 These local articles typically take the form of concise press releases offering updates on the latest developments.  
604 Contrastingly, national newspapers, faced with the challenge of engaging a readership distant from about 8,700 km and  
605 not directly impacted by events, tend to favour less frequent but more extensive publications providing summaries or in-  
606 depth analyses (see section 4.1: an average of 20-31 actors are mentioned per article in national newspapers, compared to  
607 around ten in local newspapers). This also influences the selection of quoted sources, with local journalists relying more  
608 on local actors and national journalists adopting alternative strategies like using social networks (here Twitter and  
609 Facebook for the national dailies *Le Figaro* and *Le Monde*) or relying on news agencies like AFP (France-press Agency)  
610 or their local counterparts (Lecheler and Kruike-meier, 2016). This is illustrated here by *Le Figaro* and *Le Monde* which  
611 can present a comprehensive view of the involved actors, albeit with less ease in reporting their statements. Given their  
612 limited time constraints, journalists typically favour sources they consider legitimate and relatively easy to access. The  
613 choice of sources may vary based on editorial stance (Wang et al., 1992; Shoemaker and Reese, 1996). For example, in  
614 this context, local newspapers, which are seemingly inclined to emphasise the local context in comparison to national and  
615 regional newspapers exhibit a lower rate of reported speech from French political institutions. As observed in our findings  
616 and reinforced by Ploughman (1997), journalists tend to have more accessible and regular contact with certain types of  
617 sources, including public institutions, officials, or high-profile personalities, which are more echoed in the news.

618  
619 Having acknowledged the influence of journalistic writing, we show that using this method to scrutinise press coverage  
620 also allows the identification of actor groups typically present in a crisis context related to a natural phenomenon (e.g.

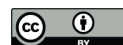

51

Fearnley et al., 2018; Trias et al., 2019, ~~using network analysis on disaster risk reduction ecosystem in the Asia-Pacific region~~; Gonzalez, 2022, ~~using assemblage theory and mapping relationships following the 1985 San Antonio Earthquake~~). First of all, the main trio in crisis management emerges as the most mentioned and quoted actors in this network: scientists overseeing monitoring, authorities responsible for civil protection, and at-risk populations (Fearnley et al., 2018; Devès et al., 2023). Other categories, such as mass media, social networks, civil society, public and para-public services, and even humanitarian aid associations (e.g. the Red Cross), are also well-represented. However, the latter are less prevalent than in other crises, likely due to relatively minimal material and human damage (only three lightly injured and cracked buildings in Mayotte). Notably, international actors, including personalities, newspapers, communities and states, are also present, which is highlighted in previous studies as indicative of a growing interconnection between actors in disaster risk reduction context on an international scale (e.g. Trias et al., 2019). In the case of this very local, small-scale crisis, the mere presence of international reactions becomes an event worth reporting by others. The actors involved in crisis management, organised by the **ORSEC (Civil Security Response organisation)** in France, are also represented. ~~As a reminder~~, according to ORSEC framework, mayors coordinate emergency services and public facility management (hospitals, schools, etc.) if the event is local. If **damages extend** department-wide and surpass the capacity of town halls, the prefecture assumes control. Ultimately, the crisis is managed by the regional headquarters (EMZCOI for Mayotte), then by the French government if the lower levels are overwhelmed. However, ~~here~~ despite the limited physical impact of this crisis, it ~~is~~ mainly the prefecture and national civil protection services (under the responsibility of ministries) that are mentioned and whose speech is reported. Local elected representatives, including mayors, are surprisingly less present than other actors who theoretically play a lesser role (such as civil society, local personalities, and public and semi-public services, including education staff), while the regional headquarters is rarely mentioned. These asymmetries in representation partly reflect Mayotte's unique situation as a French overseas department, with part of its administration, including the regional headquarters, based more than 1,400 km away in Reunion Island. This region, while distant from the mainland, poses specific challenges requiring a substantial response from the national authorities responsible for crisis management (Cottureau, 2021; Roinsard, 2022; Duchesne, 2023). Another specific feature also observed in several overseas departments is a lesser degree of cooperation between local elected representatives and national representatives located in these departments (Lemercier et al., 2014; Gillet et al., 2023). Additionally, our results highlight the emergence of different actors or groups of actors within the population, a facet not treated in the press as homogenous, as seen in official/legal texts. Particularly, several local personalities are identifiable, as observed in other cases (e.g. Devès et al., 2019). Overall, we obtain an overview of the diverse actors involved in this crisis management and communication, aligning with findings from other studies using similar (e.g. Rajput et al., 2020) or different methodologies (e.g. Villodre and Criado, 2020; Calabro et al., 2020).

Upon examining who can express themselves through media coverage, several observations emerge. Firstly, primary sources of information (often introduced or relayed by other actors quoted in the article), do not necessarily align with journalists' sources. This discrepancy may arise due to limited access to primary source, as elaborated earlier, either due to geographical distance, time constraints, **ect**, or the preference for another source deemed as more legitimate, more accessible ~~or~~ because of implicit or explicit issues of representation (see Carlson, 2009 and Grassau et al. (2021) ~~for an analysis of journalists' sources in an emergency situation~~). This opens a window into the newspaper's networks, the hierarchy of its trust, and the perceived legitimacy of interviewed sources. As identified in a qualitative analysis (Devès, Moirand and Le Vagueresse, 2023), scientific actors notably dominate reported speeches, both from the article authors

52

26



53

and third-party actors. Consequently, they are considered the most reliable or, at the very least, the most legitimate to express themselves, even surpassing the authorities responsible for crisis management and civil protection. While other studies have recognized scientists as "bridges" and "focal points" among various actors (Trias et al., 2019), the notable overrepresentation of scientific figures and institutions is noteworthy here. This could be attributed to journalists focusing on short-term issues like hazard descriptions, impacts, and emergency operations (Devès et al., 2019) or the complexities arising from scientific uncertainties requiring focused attention (Valencio and Valencio, 2018). Scientific actors, being perceived as those with the knowledge, are considered closest to understanding the phenomenon and thus are positioned to make recommendations (Oreskes, 2019). Apart from scientific personalities and institutions, the analysis indicates that media and institutional actors also benefit from greater media reach for their statements compared to actors from civil society. This proximity of journalists to institutions, as highlighted in other case studies (e.g. Ploughman, 1997; Winterlin, 2020), and their reliance on the publications of their counterparts when direct sources are unavailable (Coddington and Molyneux, 2023) are usual practices. On another other hand, social media sources exceed other mass media in reported speech share, reflecting the increasing use of social media as information sources due to their detailed coverage of current events (e.g. Lindsay, 2011; Lecheler and Kruike-meier, 2016), potentially facilitating two-way communication between institutions and the public (Feldman et al., 2016; Kim and Hastak, 2018b). However, Pourebrahim et al. (2019) argue that this potential is largely underused, showing that Twitter is dominated by authorities primarily engaged in one-way communication rather than interacting with their audiences (see also Watters and Williams, 2011). A more focused analysis would be needed to explore this in the present case. Throughout the coverage, populations in Mayotte and, to a lesser extent, schoolchildren are frequently cited, but as discussed in our qualitative analysis, they are not often the origin of citations, indicating a relatively passive position within the citation network extracted from this dataset. Despite this, the population is central to the network and is cited by numerous actors. In the general imagination, its protection is the reason for the organisation of this network, but its opinion is seldom expressed, even in local media which tend to apply pre-constructed news templates (Jemphrey and Berrington, 2000). This perpetuates an asymmetrical and hierarchical representation favouring those perceived to hold knowledge (scientists, institutions in charge of civil protection) at the expense of the inhabitants' perspective, who find themselves in the position of undergoing and being protected (Valencio and Valencio, 2018; Gonzalez et al., 2022). Journalists' common practices make it challenging for them to distance themselves from this representation (Cavaca et al., 2016). This result is explored and assessed for this case study by Devès et al. (2023), who also demonstrate that these representations are integrated by various actors in crisis management, particularly within at-risk populations.

~~That being said,~~ it is worth underscoring that identified individuals hold a significant position in this network. Despite the context where crisis and risk management, as well as communication, are organised and framed by established institutions (ministries, prefectures, town halls, scientific institutions responsible for monitoring), individual sources with clear identities tend to contribute more in reported speeches compared to institutions. Specifically, named scientists take the lead over their institutions when we examine whose speeches these articles mostly report. Moreover, local personalities are mainly quoted when directly mentioned, while the reverse is true when they are indirectly mentioned. Even in the case of crisis managers, individuals such as the prefect, cabinet director or ministries envoys clearly stand out from their respective institutions within the network (see section 4.4.). Admittedly, these personalities are often associated with an institution. Oreskes (2019) highlights this aspect in her essay "Why trust science?", using scientists as an example. She contends that trust in an individual is primarily conferred as a member of a professional community with

54

27



55

a shared body of knowledge. Butts et al. (2007) also found that coordinating roles, which include information flow, are influenced by the formal institutional status or position within an organisation. Added to this is the journalistic practice of conducting interviews, which involves collecting an institution's stance through the discourse of one of its representatives. Individuals act as entry points to information for journalists, relaying the messages of their institutions, colleagues, or, in all cases, a community. Hence, they play the role of hubs, or "guardian nodes" as mentioned by Flecha et al. (2023). However, this interpretation needs qualification based on interviews with inhabitants, analysed in Devès et al. (2023). On one hand, these interviews highlight the importance, according to Mayotte's inhabitants, of embodying information or words with a name or a face. On the other hand, they reveal a significant distrust towards political and even scientific institutions. In this study, we observed that featuring the director of the local BRGM branch over the national director was prioritised, and even the prefect over representatives of the ministries, although the latter have visited the area. Also, the local geographer, Saïd Hachim, is given prominence over members of the scientific monitoring network, even in situations where they are present during campaigns at sea or interventions with schoolchildren. Similar observations were made in two other independent studies (Cripps and Souffrin, 2020, which emphasises a general distrust towards official discourse, and Bedessem et al., 2023, which found confidence in scientists without being able to determine if this extends to trust in their institutions). In such circumstances, one might question whether there exists a gap between the representation of journalists and that of local populations, accentuated by a journalistic bias towards institutions identified as reliable and easily accessible by journalists. In any case, there is a clear need for proximity - geographical, if not cultural - between sources, given the evident dominance of cited personalities when they are on-site. With regard to local personalities in particular, their emergence in press coverage occurs later than for others, perhaps attributable to a search for new sources to compensate for the perceived lack of information on the spot (Fallou et al., 2019). In any case, the over-representation of individuals compared to institutions raises questions and warrants further investigation.

This approach offers: i) an overview of the interrelationships between all actors involved in managing this crisis, ii) highlights specificities linked to the context and media coverage; iii) reflects implicit representations and bonds of trust between actors, and iv) visualises the network's dynamics over time and how it is disrupted and reorganised after the occurrence of new events. It aligns with a theoretical background discussed in recent studies, proving relevant for studying risk and crisis management and governance: Post-ANT (Actor-Network Theory) (e.g. Beck and Kropp, 2011; Neisser et al., 2014; Bielenia-Grajewska, 2020) and Assemblage Theory (McGowran and Donovan, 2021). This study aligns with this theoretical background in several ways. First, it involves an empirical examination of interrelations and associations among actors operating in a simultaneously complex, uncertain, and ambiguous context. Our perspective on these actors is both relationalist and functionalist: it is the flow of discourse, itself structured by the roles these actors play in relation to one another, which creates and shapes this network. Moreover, these various actors are networks themselves and we consider them on an equal footing, including the media used to constitute the dataset. We also manage to depict the dynamic nature of this network and how it can be affected by the emergence of new actors, relationships, arrangements, or any other disruptive element, including non-human factors (see section 4.4). Finally this study illustrates and enhances our understanding of the patterns of ordering. Its originality lies in the fact that we apply this method not only to study the network of actors in the context of crisis management or governance but also to explore the representation that certain actors (the media) have of information circulation in this crisis management context. ~~The use of Actor-Network Theory (ANT) and Assemblage Theory is relevant in this approach, considering their application to~~

56

28



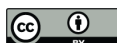

57

741 ~~discuss the role of mobilisation in communication (Bielenia-Grajewska, 2020) and the compatibility of ANT with media~~  
742 ~~theory (Couldry, 2008, and Belliger and Krieger, 2015).~~  
743

## 744 **6. Conclusion et perspectives**

745 This study proposes mapping citation and reference networks of actors identified in 6 daily newspapers as involved in  
746 information circulation during a seismo-volcanic crisis management on Mayotte island from 2018 to 2021. In addition to  
747 providing an overview of the interrelationships between these actors, it offers a dynamic representation of how these  
748 networks evolve over time and how they can be disrupted and reorganised after the occurrence of new events. It also  
749 allows us to identify the common organisation of crisis management as well as some specificities linked to the particular  
750 context of Mayotte or its treatment in the media. This method also reveals implicit representations and trust bonds among  
751 these actors and aligns with results from more detailed analyses. Key findings include an overrepresentation of scientific  
752 actors, both among actors cited in the articles and among actors introduced by a third party, which emphasise the  
753 centrality of scientific discourse in a context where the manifestations of the hazard are mainly visible through their  
754 instruments. It also calls for further research to explain the feeling of “information vacuum” highlighted by Fallou et al.  
755 (2019) among inhabitants despite the abundant communication from scientists and authorities exposed by Devès et al.  
756 (2022a) and their overrepresentation in the mediatic discourse evidenced here. Another important result is the central  
757 representation of individuals, beyond institutions, which suggests varying trust placed in individual versus institutional  
758 discourse. The tension between national and local is evident as also observed in similar contexts in other overseas  
759 departments. From an operational point of view, these results provide keys to identify profiles that have proved decisive  
760 to the flow of information. The fact that these networks are not always interconnected, especially around REVOSIMA  
761 (Mayotte volcanological and seismological monitoring network) which is sometimes completely isolated, also  
762 emphasises the need for diversified information channels to make its circulation more efficient.

764 Here, we use this method to study both networks of actors in a crisis management context and media  
765 representations of the information circulation. However, this method can have numerous other applications, such as  
766 comparing representations between different groups of actors by applying it to several different text corpuses (scientific  
767 or official press releases, media articles, experience reports, etc.) or studying the morphogenesis and the evolution of a  
768 specific actor, by focusing on a particular actor and/or a given period (for instance, to study the scientific cooperations  
769 from the point of view of the media). It is also a first step towards other explorations. For example, it could be refined to  
770 identify the actors cited in support of or in opposition to a given statement. Ultimately, it could also generate datasets for  
771 Artificial Intelligence training to automate the mapping of actors’ organisation and information circulation according to a  
772 heterogenous corpus of texts. Finally, this reproducible method can be used for other case studies around the world. It can  
773 also be analysed in other ways to study how scientific information flows from where it is produced to media, explore  
774 tensions between information and entertainment in mediatic discourses and compare mediatic covers of the same events  
775 at different geographical scales (national, regional, local).





59

## 776 **Author contributions**

777 MHD and MLT were responsible for the conceptualization of the study and project administration. MHD and MLT  
778 provided a methodology for data collection. MHD conducted the keywords selection and analysis. LLV was responsible  
779 for data collection, stockage and investigation. MLT and LLV designed the method used for actors' citation chains  
780 identification and encoding. MLT was responsible for the figures and produced the scripts for the analyses reported.  
781 MLT, MHD and LLV conducted all analyses. LLV and MLT wrote the original draft of the paper, MD undertook the  
782 revision and editing of the final paper. All authors discussed the results and the method.

## 783 **Acknowledgements**

784 This study was carried out within the framework of the MAY'VOLCANO project supported by the IdEx Université  
785 Paris Cité, Centre des Politiques de la Terre, ANR-18-IDEX-0001. The authors would like to thank Hugo Pierrot and  
786 Geoffrey Robert, whose internship work contributed to verify the completeness of the article database. This publication  
787 was financed by the V-CARE project (ANR-18-CE03-0010) and the May'science II project supported by INSU-CNRS.

## 788 **Data availability**

789 As we can not disseminate articles' content because of copyright, an attribute table is made available online on the IPGP  
790 dataverse platform (<https://dataverse.ipgp.fr/privateurl.xhtml?token=7269cab5-784a-4e85-9653-64b2784f9f48>) with : 1)  
791 a link to articles' URLs on newspaper websites, 2) key features such as newspaper name, publication date, authorship,  
792 readership and title (see Supplementary Information available on the same IPGP platform for further details). Feel free to  
793 contact the authors for more information or access to the whole database. The code used and all appendices are accessible  
794 on the same dataverse platform and a valid DOI will be provided for the publication of this article.

795

## 796 **Competing interests**

797 The authors declare that they have no conflict of interest.

798

## 799 **References**

- 800 Aday, S. (2010), Chasing the bad news: An analysis of 2005 Iraq and Afghanistan war coverage on NBC and Fox News  
801 Channel, J. Commun., 60, 144–164, doi:10.1111/j.1460-2466.2009.01472.x.
- 802 Ali, R. (2018). Question écrite à M. le ministre d'État, ministre de l'intérieur sur la crise sismique à Mayotte, Pub. L. No.  
803 8992, 23AN Journal Officiel Assemblée Nationale 4665, 2018. Retrieved from  
804 <https://www2.assemblee-nationale.fr/questions/detail/15/QE/8992>
- 805 Allan, S., Adam, B., & Carter, C. (Eds.). (2000). Environmental risks and the media. Psychology Press.
- 806 Andreastuti, S., Paripurno, E., Gunawan, H., Budianto, A., Syahbana, D., & Pallister, J. (2019). Character of community  
807 response to volcanic crises at Sinabung and Kelud volcanoes. Journal of Volcanology and Geothermal Research, 382, 298-  
808 310. DOI: 10.1016/j.jvolgeores.2017.01.022
- 809 Aylesworth-Spink, S. (2017). The failure of public relations during a pandemic outbreak: Using actor-network theory to  
810 highlight the news media as a complex mediator. Public Relations Journal, 11(2), 1-17.
- 811 Barclay, J., Haynes, K., Mitchell, T., Solana, C., Teeuw, R., Darnell, A., ... & Kelman, I. (2008). Framing volcanic risk  
812 communication within disaster risk reduction: finding ways for the social and physical sciences to work together.  
813 Geological Society, London, Special Publications, 305(1), 163-177. DOI: 10.1144/SP305.14.



61

- 814 Beck, U. 2001. *La société du risque : sur la voie d'une autre modernité*, Paris, Flammarion, 2006.
- 815 Beck, G., & Kropp, C. (2011). Infrastructures of risk: a mapping approach towards controversies on risks. *Journal of risk*  
816 *research*, 14(1), 1-16.
- 817 Belliger, A., & Krieger, D. J. (2017). The end of media: Reconstructing media studies on the basis of actor-network theory.  
818 In *Applying the actor-network theory in media studies* (pp. 20-37). IGI Global.
- 819 Bertil, D., Mercury, N., Doubre, C., Lemoine, A., & Van der Woerd, J. (2021). The unexpected Mayotte 2018–2020  
820 seismic sequence: a reappraisal of the regional seismicity of the Comoros. *Comptes Rendus. Géoscience*, 353(S1), 1-25.
- 821 Bernier, A., Ligier, C., Guillemot, D., & Watier, L. (2013). Did media attention of the 2009 A (H1N1) influenza epidemic  
822 increase outpatient antibiotic use in France?: A time-series analysis. *PloS one*, 8(7), e69075. DOI:  
823 10.1371/journal.pone.006907
- 824 Bielenia-Grajewska, M. (2020). Communicative Approaches to Risk Management in Complex Systems Through the Prism  
825 of Actor-Network Theory. *Contemporary Applications of Actor Network Theory*, 15-32.
- 826 Billard, T. J., & Moran, R. E. (2023). Designing Trust: Design Style, Political Ideology, and Trust in “Fake” News  
827 Websites. *Digital Journalism*, 11(3), 519-546.
- 828 Bour, M., & Sedan, O. (2002). Note sur le positionnement de Mayotte en matière de règles parasismiques. Rapport  
829 BRGM/RP-51841-FR, 12 p., 2 fig., 2 tabl.
- 830 Boykoff, M. T., & Boykoff, J. M. (2004). Balance as bias: Global warming and the US prestige press. *Global*  
831 *environmental change*, 14(2), 125-136.
- 832 Burkhart, F. N. (1991). Journalists as bureaucrats: perceptions of ‘social responsibility’ media roles in local emergency  
833 planning. *International Journal of Mass Emergencies and Disasters*, 9(1), 75-87.
- 834 Butts, C. T., Petrescu-Prahova, M., & Cross, B. R. (2007). Responder communication networks in the world trade center  
835 disaster: Implications for modeling of communication within emergency settings. *The Journal of Mathematical Sociology*,  
836 31(2), 121 — 147. doi: 10.1080/00222500601188056
- 837 Cagé, J., Hervé, N., and Viard, M.-L. (2017). *L’information à tout prix*. Ina éditions, Paris, [https://halsciencespo.archives-](https://halsciencespo.archives-ouvertes.fr/hal01521888)  
838 [ouvertes.fr/hal01521888](https://halsciencespo.archives-ouvertes.fr/hal01521888).
- 839 Calabrò, L., Harris, A. J., & Thouret, J. C. (2020). Media views of the Stromboli 2002–2003 eruption and evacuation: a  
840 content analysis to understand framing of risk communication during a volcanic crisis. *Journal of Applied Volcanology*,  
841 9(1), 1-23. DOI: 10.1186/s13617-020-00094-0.
- 842 Callon, M. (2006). Sociologie de l’acteur réseau. *Sociologie de la traduction. Textes fondateurs*, 267-276.
- 843 Camilleri, Stephen, Matthew R. Agius, and Joel Azzopardi. "Analysis of online news coverage on earthquakes through text  
844 mining." *Frontiers in Earth Science* 8 (2020): 141. DOI: 10.3389/feart.2020.00141.
- 845 Carlson, M. (2009). Dueling, dancing, or dominating? Journalists and their sources. *Sociology Compass*, 3(4), 526-542.
- 846 Carter, L. H., & Kenney, C. M. (2018). A tale of two communities: B-race-ing disaster responses in the media following  
847 the Canterbury and Kaikōura earthquakes. *International journal of disaster risk reduction*, 28, 731-738.
- 848 Cavaca, A. G., Emerich, T. B., Vasconcellos-Silva, P. R., Santos-Neto, E. T. D., & Oliveira, A. E. (2016). Diseases  
849 neglected by the media in Espírito Santo, Brazil in 2011–2012. *PLoS neglected tropical diseases*, 10(4), e0004662.
- 850 Center, A. D. R. (2015). Sendai framework for disaster risk reduction 2015–2030. *United Nations Office for Disaster Risk*  
851 *Reduction: Geneva, Switzerland*.
- 852 Coddington, M., & Molyneux, L. (2023). Making sources visible: Representation of evidence in news texts, 2007–2019.  
853 *Journalism Practice*, 17(4), 664-682.)
- 854 Coleman, C. L. (1993). The influence of mass media and interpersonal communication on societal and personal risk  
855 judgments. *Communication Research*, 20(4), 611-628. DOI: 10.1177/009365093020004006.

62

31



63

- 856 Cottureau, V. (2021). Mayotte, vers une île «forteresse»? Histoire et conséquences d'une frontière controversée.  
857 *L'Information géographique*, 85(1), 8-30.
- 858 Couldry, Nick (2008) *Actor network theory and media: do they connect and on what terms?* In: Hepp, Andreas, Krotz,  
859 Friedrich, Moores, Shaun and Winter, Carsten, (eds.) *Connectivity, Networks and Flows: Conceptualizing Contemporary*  
860 *Communications*. Hampton Publishing, Cresskill, NJ, USA, pp. 93-110. ISBN 9781572738577
- 861 Courant, F., Biscay, J-F., Boutillet, D., Rizza, C., Vinet, F. & Weiss, K. (2021). Rapport de la mission sur la transparence,  
862 l'information et la participation de tous à la gestion des risques majeurs, technologiques ou naturels. Juin 2021. Ministère de  
863 la transition écologique, France.
- 864 Cripps A., Souffrin E., 2020. *Étude socio-anthropologique sur la perception des risques naturels à Mayotte. Rapport Final.*  
865 *Étude déterminants socioculturels risques naturels Mayotte par le cabinet ESOI pour la CRF/PIROI*, 131 p.
- 866 Devès, M. H., Moirand, S., & Le Vagueresse, L. (2023). De l'évènement «naturel» aux discours et pratiques langagières...  
867 dans le champ de la réduction des risques (Mayotte, 2018-2022). *Nouvelle revue de psychosociologie*, 36(2), 163-179.
- 868 Devès, M., Lacassin, R., Pécout, H., & Robert, G. (2022a). Risk communication during seismo-volcanic crises: the  
869 example of Mayotte, France. *Natural Hazards and Earth System Sciences*, 22(6), 2001-2029.
- 870 Devès, M. H., Moirand, S., Le Vagueresse, L., & Robert, G. (2022b). Mayotte's seismo-volcanic "crisis" in news accounts  
871 (2018–2021). *Comptes Rendus. Géoscience*, 354(S2), 391-415.
- 872 Devès, M. H., Le Texier, M., Pécout, H., & Grasland, C. (2019). Seismic risk: the biases of earthquake media coverage.  
873 *Geoscience Communication*, 2(2), 125-141. DOI: 10.5194/gc-2-125-201.
- 874 Dixon, T. L. (2008a), Crime news and racialized beliefs: Understanding the relationship between local news viewing and  
875 perceptions of African Americans and crime, *J. Commun.*, 58, 106–125, doi:10.1111/j.1460- 2466.2007.00376.x
- 876 Drabek, T. E. (1986). *Human system responses to disaster: An inventory of sociological findings*. New York: Springer-  
877 Verlag. DOI: 10.1007/978-1-4612-4960-3
- 878 Duchesne, A. (2023). Mayotte: mutations démographiques et multiples enjeux politiques. *Population Avenir*, 763(3), 14-  
879 16.
- 880 Fallou, L., Bossu, R., Landès, M., Roch, J., Roussel, F., Steed, R., & Julien-Laferrrière, S. (2020). Citizen seismology  
881 without seismologists? Lessons learned from Mayotte leading to improved collaboration. *Frontiers in Communication*, 5,  
882 49. DOI: 10.3389/fcomm.2020.00049
- 883 Feldman, D., Contreras, S., Karlin, B., Basolo, V., Matthew, R., Sanders, B., ... Luke, A. (2016). Communicating flood  
884 risk: Looking back and forward at traditional and social media outlets. *International Journal of Disaster Risk Reduction*, 15,  
885 43–51. [http://dx. doi.org/10.1016/j.ijdr.2015.12.004](http://dx.doi.org/10.1016/j.ijdr.2015.12.004).
- 886 Feuillet, N., Jorry, S., Crawford, W., Deplus, C., Thinon, I., Jacques, E., ... & Van der Woerd, J. (2021). Birth of a large  
887 volcanic edifice through lithosphere-scale dyking offshore Mayotte (Indian Ocean). DOI: 10.1038/s41561-021-00809-x.
- 888 Flecha, A. C., Bandeira, R. A., Campos, V. B. G., Silva, A. V. C., & Leiras, A. (2023). Social Network Analysis in disaster  
889 management. *Production*, 33, e20220046.
- 890 Gamson, W. A., and A. Modigliani (1989), Media discourse and public opinion on nuclear power: A constructionist  
891 approach, *Am. J. Sociol.*, 95(1), 1–37, doi:10.1086/229213
- 892 Gillet, O., Daudé, É., Gherardi, M., Leone, F., & Komorowski, J. C. (2023). La Soufrière de Guadeloupe: Assessing public  
893 preparedness for a new volcanic crisis. *EchoGéo*, (64).
- 894 Grassau, D., Valenzuela, S., & Puente, S. (2021). What "emergency sources" expect from journalists: Applying the  
895 hierarchy of influences Model to disaster news coverage. *International Journal of Communication*, 15, 23.
- 896 Harris, Andrew JL, et al. "Impact of the Eyjafjallajökull ash cloud: a newspaper perspective." *Journal of Geophysical*  
897 *Research: Solid Earth* 117.B9 (2012). DOI: 10.1029/2011JB008735
- 898 Hijmans, E. (1996). Logic for qualitative media content analysis: A typology. *Communications-Sankt Augustin Then*  
899 *Berlin-*, 21, 93-108.

64

32



65

- 900 Hossein, S., & Sadaomi, S. (2021). Observation of the long-period monotonic seismic waves of the November 11, 2018,  
901 Mayotte event by Iranian broadband seismic stations. *Earth, Planets and Space (Online)*, 73(1).
- 902 INSEE. 2017. « Les chiffres clés de Mayotte », <https://www.insee.fr/fr/statistiques/4632225>.
- 903 Jemphrey, A. and E. Berrington (2000) ‘Surviving the media: Hillsborough, Dunblane and the press’. *Journalism Studies*.  
904 1(3). pp. 469–483.
- 905 Kim, J., Bae, J., & Hastak, M. (2018). Emergency information diffusion on online social media during storm Cindy in US.  
906 *International Journal of Information Management*, 40, 153-165.
- 907 Kim, J., & Hastak, M. (2018b). Social network analysis: Characteristics of online social networks after a disaster.  
908 *International Journal of Information Management*, 38(1), 86–96. <http://dx.doi.org/10.1016/j.ijinfomgt.2017.08.003>.
- 909 Lachlan, K. A., Spence, P. R., Lin, X., & Del Greco, M. (2014). Screaming into the wind: Examining the volume and  
910 content of tweets associated with Hurricane Sandy. *Communication Studies*, 65(5), 500-518.
- 911 Lavayssière, A., & Retailleau, L. (2021, April). Short-and long-term evolution of the seismicity associated with the New  
912 Volcanic Edifice offshore Mayotte island. In *EGU General Assembly Conference Abstracts* (pp. EGU21-2769).
- 913 Lecheler, S., & Kruikemeier, S. (2016). Re-evaluating journalistic routines in a digital age: A review of research on the use  
914 of online sources. *New media & society*, 18(1), 156-171.
- 915 Léglise, I. & Garric N. (2012), *Discours d’experts et d’expertise*. Berne, Peter Lang, 226 p.
- 916 Lejeune, P., (2005), « Le brouillage énonciatif dans le compte-rendu de documents techniques » : le cas du Monde et des  
917 Notes de conjoncture de de l’Insee » In *Dans la jungle des discours. Genres de discours et discours rapporté*. Universidad  
918 de Cadiz, Servicio de Pulicaciones, 237-248.
- 919 Lemerrier, É., Muni Toke, V., & Palomares, É. (2014). Les Outre-mer français: Regards ethnographiques sur une catégorie  
920 politique. *Terrains & travaux*, (1), 5-38.
- 921 Lemoine, A, et al. 2020. The 2018–2019 seismo-volcanic crisis east of Mayotte, Comoros islands: seismicity and ground  
922 deformation markers of an exceptional submarine eruption. *Geophysical Journal International*, 223(1): 22–44. DOI:  
923 <https://doi.org/10.1093/gji/ggaa273>
- 924 Le Texier, M., Devès, M. H., Grasland, C., & De Chabaliér, J. B. (2016). Earthquakes media coverage in the digital age.  
925 *L’Espace géographique*, 45(1), 5-24.
- 926 Lindell, M. K., Prater, C., Perry, R. W., & Nicholson, W. C. (2006). *Fundamentals of emergency management*. FEMA  
927 Washington, DC, USA. DOI: 10.1111/j.0361-3666.2003.00237.x
- 928 Lindsay, B. R. (2011). Social media and disasters: Current uses, future options and policy considerations. congressional  
929 research service reports, 13. [Retrieved from] <http://fas.org/sgp/crs/homesec/R41987.pdf>. Liu, B. F., Fraustino, J. D., &  
930 Jin, Y. (2014
- 931 Llasat, M. C., Llasat-Botija, M., Barnolas, M., López, L., & Altava-Ortiz, V. (2009). An analysis of the evolution of  
932 hydrometeorological extremes in newspapers: the case of Catalonia, 1982–2006. *Natural Hazards and Earth System*  
933 *Sciences*, 9(4), 1201-1212.
- 934 McGowran, P., and A. Donovan. 2021. Assemblage theory and disaster risk management. *Progress in Human Geography*  
935 45(6): 1601–1624.
- 936 McLaren, C. D., & Bruner, M. W. (2022). Citation network analysis. *International Review of Sport and Exercise*  
937 *Psychology*, 15(1), 179-198.
- 938 Milet, D. S., & Sorensen, J. H. (1990). Communication of emergency public warnings: A social science perspective and  
939 state-of-the-art assessment, ORNL. Oak Ridge National Lab., TN: Oak Ridge National Laboratory, Department of Energy,  
940 USA. DOI: 10.2172/6137387
- 941 Moirand, S. (2006). De l’aire de la page à l’hyperstructure et à l’écran: comment lire et analyser la presse quotidienne  
942 ordinaire. *Cauce, Revista Internacional de Filología y su Didáctica*, (29), 295-320.

66

33



67

- 943 Mori, M. 2021. « Crisis narratives and (dis) placement: Space, time and earthquakes in Mayotte » . Ampersand, 8: 100078.  
944 DOI: /10.1016/j.amper.2021.100078
- 945 Mori, M. 2022. « Storytelling, language, and the earthquake swarm of May 2018: Insights into Shimaore and Kibushi from  
946 narrative analysis ». Comptes Rendus Géoscience, 354, S2, 417-437. DOI: 10.5802/crgeos.131.
- 947 Nazari, M. R. (2011). The Role of Broadcasting in Management of Natural Disasters\*\* Mohammad Reza Nazari,\*\* Md  
948 Salleh Bin Hj Hassan,“Saadat Parhizkar;” Mohd Nizam Osman" Department of Communication, Faculty of Modern  
949 Languages and Communication. *World Applied Sciences Journal*, 14(2), 334-340.
- 950 Neisser, F. M. (2014). ‘Riskscapes’ and risk management–Review and synthesis of an actor-network theory approach. *Risk*  
951 *Management*, 16, 88-120.
- 952 Nielsen, R. K. (2015). Local newspapers as keystone media: The increased importance of diminished newspapers for local  
953 political information. *Local Journalism: the decline of newspapers and the rise of digital media*, 1-30.
- 954 Oreskes, N. (2019). Why trust science? Princeton University Press.
- 955 Otte, E., & Rousseau, R. (2002). Social network analysis: a powerful strategy, also for the information sciences. *Journal of*  
956 *information Science*, 28(6), 441-453.
- 957 Park, S. J., Lim, Y. S., & Park, H. W. (2015). Comparing Twitter and YouTube networks in information diffusion: The  
958 case of the “Occupy Wall Street” movement. *Technological forecasting and social change*, 95, 208-217.
- 959 Pavelka, J. (2014). The factors affecting the presentation of events and the media coverage of topics in the mass media.  
960 *Procedia-Social and Behavioral Sciences*, 140, 623-629.
- 961 Perry, R. W., & Lindell, M. K. (1989). Communicating threat information for volcanic hazards. I Pp. 47–62 in LM Walters,  
962 L. Wilkins, and T. Walters (Eds. eds.) Bad Tidings: Communication and Catastrophe. DOI: 10.4324/9781315044767-4
- 963 Picard, Y. (2019, February 8). Plus d’informations et de communication sur les séismes à Mayotte. Retrieved January 7,  
964 2021, from [https://www.change.org/p/m-le-préfet-de-mayotte-plus-dinformations-et-de-communication-sur-les-séismes-à-](https://www.change.org/p/m-le-préfet-de-mayotte-plus-dinformations-et-de-communication-sur-les-séismes-à-mayotte)  
965 [mayotte](https://www.change.org/p/m-le-préfet-de-mayotte-plus-dinformations-et-de-communication-sur-les-séismes-à-mayotte)
- 966 Ploughman, P. (1995). Local newspaper roles in the Love Canal disaster. *Newspaper Research Journal*, 16(2), 56-75.
- 967 Ploughman, P. (1997). Disasters, the media and social structures: A typology of credibility hierarchy persistence based on  
968 newspaper coverage of the Love Canal and six other disasters. *Disasters*, 21(2), 118-137.
- 969 Poudel, B. R., Fitzgerald, G., Clark, M., Mehta, A., & Poudyal, M. (2015). Disaster management in Nepal: media  
970 engagement in the post-2015 framework for disaster risk reduction. *Planet@ risk*, 3(2), 209-221.
- 971 Pourebrahim, N., Sultana, S., Edwards, J., Gochanour, A., & Mohanty, S. (2019). Understanding communication dynamics  
972 on Twitter during natural disasters: A case study of Hurricane Sandy. *International journal of disaster risk reduction*, 37,  
973 101176.
- 974 Quarantelli, E. L. (2002). The role of the mass communication system in natural and technological disasters and possible  
975 extrapolation to terrorism situations. *Risk Management*, 4(4), 7-21. DOI: 10.1057/palgrave.rm.8240130 Rebol-Touré, S.  
976 (2021). The Crisis in Discourse: As an Event, a Discursive Semantics, and a Culture. *Zeitschrift für Literaturwissenschaft*  
977 *und Linguistik*, 51(3), 399-420. DOI:10.1007/s41244-021-00211-5
- 978 Quarantelli, E. L. (1996). Local mass media operations in disasters in the USA. *Disaster Prevention and Management: An*  
979 *International Journal*, 5(5), 5-10.
- 980 Rajput, A. A., Li, Q., Zhang, C., & Mostafavi, A. (2020). Temporal network analysis of inter-organizational  
981 communications on social media during disasters: A study of Hurricane Harvey in Houston. *International journal of*  
982 *disaster risk reduction*, 46, 101622.
- 983 Rebol-Touré, S. (2021). The Crisis in Discourse: As an Event, a Discursive Semantics, and a Culture. *Zeitschrift für*  
984 *Literaturwissenschaft und Linguistik*, 51(3), 399.
- 985 Roinsard, N. 2014. « Conditions de vie, pauvreté et protection sociale à Mayotte : une approche pluridimensionnelle des  
986 inégalités », *Revue française des affaires sociales*, 4, 28-49

68

34



69

- 987 Roinsard, N. (2019). Une jeunesse en insécurité. *Plein droit*, (1), 32-35.
- 988 Roinsard, N. (2022). *Une situation postcoloniale-Mayotte ou le gouvernement des marges*. CNRS éditions.
- 989 Ruellan, D. (1992). Le professionnalisme du flou. *Réseaux. Communication-Technologie-Société*, 10(51), 25-37.
- 990 Sapountzi, A., & Psannis, K. E. (2018). Social networking data analysis tools & challenges. *Future Generation Computer*  
991 *Systems*, 86, 893-913.
- 992 Saurel, J. M., Jacques, E., Aiken, C., Lemoine, A., Retailleau, L., Lavayssière, A., ... & Feuillet, N. (2021). Mayotte  
993 seismic crisis: building knowledge in near real-time by combining land and ocean-bottom seismometers, first results.  
994 *Geophysical Journal International*, 228(2), 1281-1293.
- 995 Scanlon, J. (2007). Unwelcome irritant or useful ally? The mass media in emergencies. In *Handbook of disaster research*  
996 (pp. 413-429). Springer, New York, NY. DOI: 10.1007/978-0-387-32353-4\_24.
- 997 Schindler, J., Krämer, B., & Müller, P. (2017). Looking left or looking right? Effects of newspaper layout style on the  
998 perception of political news. *European Journal of Communication*, 32(4), 348-366.
- 999 Skotnes, R. Ø., Hansen, K., & Krøvel, A. V. (2021). Risk and Crisis Communication about Invisible Hazards. DOI:  
1000 10.30658/jicrcr.4.2.9
- 1001 Severo, M., Beauguitte, L., & Pecout, H. (2015, June). Archiving news on the Web through RSS flows. A new tool for  
1002 studying international events. In *RESAW 2015. Web Archives as Scholarly Sources: Issues, Practices and Perspectives*.
- 1003 Shoemaker, P. J., & Reese, S. D. (1996). *Mediating the message* (pp. 781-795). White Plains, NY: Longman.
- 1004 Skotnes, R. Ø., Hansen, K., & Krøvel, A. V. (2021). Risk and Crisis Communication about Invisible Hazards. DOI:  
1005 10.30658/jicrcr.4.2.9
- 1006 Solana, M. C., et al. "Supporting the development of Procedures for Communications during volcanic Emergencies:  
1007 Lessons Learnt from the canary Islands (Spain) and Etna and Stromboli (Italy)." *Observing the Volcano World*. Springer,  
1008 Cham, 2017. 289-305. DOI: 10.1007/11157\_2016\_48
- 1009 Steelman, T. A., McCaffrey, S. M., Velez, A. L. K., & Briefel, J. A. (2015). What information do people use, trust, and find  
1010 useful during a disaster? Evidence from five large wildfires. *Natural Hazards*, 76(1), 615-634. DOI: 10.1007/s11069-014-  
1011 1512-x.
- 1012 Thistlethwaite, J., & Henstra, D. (2019). Leveraging media coverage of disasters to support disaster risk reduction.
- 1013 Tierney, K. J., Lindell, M. K., & Perry, R. W. (2001). *Facing the unexpected: Disaster preparedness and response in the*  
1014 *United States*. Washington DC: Joseph Henry Press. DOI: 10.1108/dpm.2002.11.3.222.1
- 1015 Trias, A. P. L., Lassa, J., & Surjan, A. (2019). Connecting the actors, discovering the ties: Exploring disaster risk  
1016 governance network in Asia and the Pacific. *International Journal of Disaster Risk Reduction*, 33, 217-228.
- 1017 UNISDR. (2015). *Sendai Framework for Disaster Risk Reduction 2015-2030*. Geneva: United Nations Office for Disaster  
1018 Risk Reduction. Retrieved from: <https://www.preventionweb.net/publications/view/43291>
- 1019 Valencio, N., & Valencio, A. (2018). Media coverage of the 'UK flooding crisis': a social panorama. *Disasters*, 42(3), 407-  
1020 431.
- 1021 Van Belle, D. A. (2015). Media's role in disaster risk reduction: The third-person effect. *International journal of disaster*  
1022 *risk reduction*, 13, 390-399.
- 1023 Villodre, J., & Criado, J. I. (2020). User roles for emergency management in social media: Understanding actors' behavior  
1024 during the 2018 Majorca Island flash floods. *Government Information Quarterly*, 37(4), 101521.
- 1025 Wachinger, G., Renn, O., Begg, C., and Kuhlicke, C. (2013). The risk perception paradox—implications for governance  
1026 and communication of natural hazards. *Risk Anal.*, 33(6), 1049–1065. DOI: 10.1111/j.1539- 6924.2012.01942.x
- 1027 Wang, S. (1992). Factors influencing cross-national news treatment of a critical national event: A comparative study of six  
1028 countries' media coverage of the 1989 Chinese student demonstrations. *Gazette (Leiden, Netherlands)*, 49(3), 193-214.

70

35



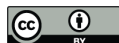

71

- 1029 Williams, H. T., McMurray, J. R., Kurz, T., & Lambert, F. H. (2015). Network analysis reveals open forums and echo  
1030 chambers in social media discussions of climate change. *Global environmental change*, 32, 126-138.
- 1031 Wintterlin, F. (2020). Trust in distant sources: An analytical model capturing antecedents of risk and trustworthiness as  
1032 perceived by journalists. *Journalism*, 21(1), 130-145.
